# Supplementary material for: Genome-Wide Identification of Genes Conferring Energy Related Resistance to a Synthetic Antimicrobial Peptide (Bac8c)
Source: PLoS One. 2013 Jan 31;8(1):e55052. doi: 10.1371/journal.pone.0055052 (PMC3561415; doi:10.1371/journal.pone.0055052)
Supplement: Table S2 — Raw fitness data for Bac8c selections. (XLSX) [file pone.0055052.s002.xlsx]

## Sheet: 6_0
Clone Start	Clone Stop	Fitness	ln(Fitness)	Gene Start	Gene Stop	Gene	COG	COG Name	Function
3829750	3831000	48.3157	3.87776	3828480	3830189	yicH	-	not classify	hypothetical protein
3829750	3831000	48.3157	3.87776	3830242	3832560	yicI	G	Carbohydrate transport and metabolism	predicted alpha-glucosidase
4462375	4462875	45.2648	3.81253	4461077	4462732	treC	-	not classify	trehalose-6-P hydrolase
4462375	4462875	45.2648	3.81253	4462782	4464203	treB	G	Carbohydrate transport and metabolism	fused trehalose(maltose)-specific PTS enzyme: IIB component/IIC component
1094500	1095000	28.2402	3.34075	1094361	1094669	insE-4	-	not classify	IS3 element protein InsE
1094500	1095000	28.2402	3.34075	1094767	1095069	ymdE	I	Lipid metabolism	hypothetical protein
4257375	4259375	25.717	3.24715	4257260	4257469	yjbJ	S	Function unknown	predicted stress response protein
4257375	4259375	25.717	3.24715	4257511	4258026	zur	P	Inorganic ion transport and metabolism	DNA-binding transcriptional repressor, Zn(II)-binding
4257375	4259375	25.717	3.24715	4258344	4258598	yjbL	-	not classify	hypothetical protein
4257375	4259375	25.717	3.24715	4258622	4259329	yjbM	-	not classify	hypothetical protein
368125	368625	22.2877	3.10403	367835	369499	mhpA	C	Energy production and conversion	3-(3-hydroxyphenyl)propionate hydroxylase
179125	179875	19.519	2.97139	178455	179153	pfs	F	Nucleotide transport and metabolism	5'-methylthioadenosine/S-adenosylhomocysteine nucleosidase
179125	179875	19.519	2.97139	179237	180754	dgt	F	Nucleotide transport and metabolism	deoxyguanosinetriphosphate triphosphohydrolase
3829875	3830375	19.4541	2.96806	3828480	3830189	yicH	-	not classify	hypothetical protein
3829875	3830375	19.4541	2.96806	3830242	3832560	yicI	G	Carbohydrate transport and metabolism	predicted alpha-glucosidase
3829750	3830500	18.6202	2.92425	3828480	3830189	yicH	-	not classify	hypothetical protein
3829750	3830500	18.6202	2.92425	3830242	3832560	yicI	G	Carbohydrate transport and metabolism	predicted alpha-glucosidase
2756375	2757125	16.1378	2.78116	2755666	2756622	yfjH	-	not classify	CP4-57 prophage; predicted protein
2756375	2757125	16.1378	2.78116	2756666	2756878	alpA	K	Transcription	CP4-57 prophage; DNA-binding transcriptional activator
2756375	2757125	16.1378	2.78116	2757007	2758416	yfjI	-	not classify	CP4-57 prophage; predicted protein
4257375	4258125	15.3937	2.73396	4257260	4257469	yjbJ	S	Function unknown	predicted stress response protein
4257375	4258125	15.3937	2.73396	4257511	4258026	zur	P	Inorganic ion transport and metabolism	DNA-binding transcriptional repressor, Zn(II)-binding
4257375	4257875	15.2649	2.72555	4257260	4257469	yjbJ	S	Function unknown	predicted stress response protein
4257375	4257875	15.2649	2.72555	4257511	4258026	zur	P	Inorganic ion transport and metabolism	DNA-binding transcriptional repressor, Zn(II)-binding
368000	368750	14.9197	2.70268	367835	369499	mhpA	C	Energy production and conversion	3-(3-hydroxyphenyl)propionate hydroxylase
266000	267500	14.3339	2.66263	265334	266191	yafY	K	Transcription	CP4-6 prophage; predicted DNA-binding transcriptional regulator
266000	267500	14.3339	2.66263	266408	267229	yafZ	-	not classify	CP4-6 prophage; conserved protein
266000	267500	14.3339	2.66263	267321	268184	ykfA	R	General function prediction only	CP4-6 prophage; predicted GTP-binding protein
128125	129125	13.8912	2.63125	127912	129336	lpdA	C	Energy production and conversion	dihydrolipoamide dehydrogenase
1247500	1248750	13.2215	2.58185	1246919	1248337	dhaH	S	Function unknown	fused predicted dihydroxyacetone-specific PTS enzymes: HPr component/EI component
1247500	1248750	13.2215	2.58185	1248348	1248980	dhaL	G	Carbohydrate transport and metabolism	dihydroxyacetone kinase, C-terminal domain
1671500	1672500	12.3789	2.51599	1671160	1671525	mdtJ	P	Inorganic ion transport and metabolism	multidrug efflux system transporter
1671500	1672500	12.3789	2.51599	1671937	1672971	ydgG	R	General function prediction only	predicted inner membrane protein
3470250	3472250	11.4923	2.44168	3469422	3471536	fusA	J	Translation, ribosomal structure and biogenesis	elongation factor EF-2
3470250	3472250	11.4923	2.44168	3471564	3472103	rpsG	J	Translation, ribosomal structure and biogenesis	30S ribosomal protein S7
3470250	3472250	11.4923	2.44168	3472200	3472574	rpsL	-	not classify	30S ribosomal protein S12
2004500	2005500	11.4429	2.43737	2004180	2005667	amyA	-	not classify	cytoplasmic alpha-amylase
1012625	1014375	11.0742	2.40462	1012482	1014122	pqiB	R	General function prediction only	paraquat-inducible protein B
1012625	1014375	11.0742	2.40462	1014134	1014682	ymbA	S	Function unknown	hypothetical protein
3915625	3917375	10.5029	2.35165	3915425	3916288	atpG	C	Energy production and conversion	F0F1 ATP synthase subunit gamma
3915625	3917375	10.5029	2.35165	3916339	3917880	atpA	C	Energy production and conversion	F0F1 ATP synthase subunit alpha
2767125	2767875	10.4889	2.35032	2766687	2767508	yfjQ	-	not classify	CP4-57 prophage; predicted protein
2767125	2767875	10.4889	2.35032	2767725	2768426	yfjR	K	Transcription	CP4-57 prophage; predicted DNA-binding transcriptional regulator
4496125	4497375	10.3755	2.33945	4496618	4497523	insD-6	L	DNA replication, recombination and repair	KpLE2 phage-like element; IS2 insertion element transposase InsAB'
1058625	1060375	10.3715	2.33906	1058479	1061025	torA	C	Energy production and conversion	trimethylamine N-oxide (TMAO) reductase I, catalytic subunit
884125	884875	10.3431	2.33632	882896	884128	cmr	-	not classify	multidrug efflux system protein
884125	884875	10.3431	2.33632	884169	884453	ybjH	-	not classify	hypothetical protein
884125	884875	10.3431	2.33632	884539	885354	ybjI	R	General function prediction only	hypothetical protein
3460750	3461500	9.72937	2.27515	3460366	3460953	gspJ	U	Intracellular trafficking, secretion,and vesicular transport	predicted general secretory pathway component, cryptic
3460750	3461500	9.72937	2.27515	3460946	3461929	gspK	U	Intracellular trafficking, secretion,and vesicular transport	general secretory pathway component, cryptic
827125	828625	9.28313	2.2282	826468	828204	ybhF	V	Defense mechanisms	fused predicted transporter subunits of ABC superfamily: ATP-binding components
827125	828625	9.28313	2.2282	828197	829195	ybhG	M	Cell envelope biogenesis, outer membrane	hypothetical protein
827125	828875	9.05759	2.2036	826468	828204	ybhF	V	Defense mechanisms	fused predicted transporter subunits of ABC superfamily: ATP-binding components
827125	828875	9.05759	2.2036	828197	829195	ybhG	M	Cell envelope biogenesis, outer membrane	hypothetical protein
4441875	4443375	8.66088	2.15882	4440405	4442138	ytfM	M	Cell envelope biogenesis, outer membrane	predicted outer membrane protein and surface antigen
4441875	4443375	8.66088	2.15882	4442135	4445914	ytfN	S	Function unknown	hypothetical protein
4000000	4001000	8.64902	2.15745	3999449	4000399	corA	P	Inorganic ion transport and metabolism	magnesium/nickel/cobalt transporter
4000000	4001000	8.64902	2.15745	4000442	4000822	yigF	-	not classify	conserved inner membrane protein
4000000	4001000	8.64902	2.15745	4000836	4001216	yigG	-	not classify	predicted inner membrane protein
266000	267250	8.5534	2.14633	265334	266191	yafY	K	Transcription	CP4-6 prophage; predicted DNA-binding transcriptional regulator
266000	267250	8.5534	2.14633	266408	267229	yafZ	-	not classify	CP4-6 prophage; conserved protein
260000	260750	8.5516	2.14612	259612	260715	proB	E	Amino acid transport and metabolism	gamma-glutamyl kinase
260000	260750	8.5516	2.14612	260727	261980	proA	E	Amino acid transport and metabolism	gamma-glutamyl phosphate reductase
1241875	1243125	8.38973	2.12701	1241389	1242303	ldcA	V	Defense mechanisms	L,D-carboxypeptidase A
1241875	1243125	8.38973	2.12701	1242403	1243014	emtA	M	Cell envelope biogenesis, outer membrane	lytic murein endotransglycosylase E
1241875	1243125	8.38973	2.12701	1243016	1243750	ycgR	M	Cell envelope biogenesis, outer membrane	protein involved in flagellar function
2024125	2024875	8.02149	2.08212	2023535	2024350	yedP	R	General function prediction only	hypothetical protein
2024125	2024875	8.02149	2.08212	2024347	2026041	yedQ	-	not classify	predicted diguanylate cyclase
1412750	1413500	7.90463	2.06745	1412008	1412817	recT	-	not classify	Rac prophage; recombination and repair protein
1412750	1413500	7.90463	2.06745	1412810	1415410	recE	-	not classify	Rac prophage; exonuclease VIII, 5' -> 3' specific dsDNA exonuclease
2061000	2061750	7.87246	2.06337	2060415	2061347	erfK	S	Function unknown	conserved protein with NAD(P)-binding Rossmann-fold domain
2061000	2061750	7.87246	2.06337	2061412	2062491	cobT	H	Coenzyme metabolism	nicotinate-nucleotide--dimethylbenzimidazole phosphoribosyltransferase
3829625	3831125	7.68189	2.03887	3828480	3830189	yicH	-	not classify	hypothetical protein
3829625	3831125	7.68189	2.03887	3830242	3832560	yicI	G	Carbohydrate transport and metabolism	predicted alpha-glucosidase
3925125	3926125	7.61042	2.02952	3925178	3926170	asnA	E	Amino acid transport and metabolism	asparagine synthetase AsnA
2131125	2131875	7.5115	2.01643	2130582	2131421	wcaA	M	Cell envelope biogenesis, outer membrane	predicted glycosyl transferase
2131125	2131875	7.5115	2.01643	2131514	2133676	wzc	M	Cell envelope biogenesis, outer membrane	protein-tyrosine kinase
1327500	1328250	7.34624	1.99419	1327356	1328405	sohB	U	Intracellular trafficking, secretion,and vesicular transport	predicted inner membrane peptidase
4293250	4294250	7.29134	1.98669	4292504	4293817	gltP	C	Energy production and conversion	glutamate/aspartate:proton symporter
2209500	2210500	7.27715	1.98474	2209247	2209708	yehR	-	not classify	hypothetical protein
2209500	2210500	7.27715	1.98474	2209748	2210218	yehS	-	not classify	hypothetical protein
2209500	2210500	7.27715	1.98474	2210265	2210984	yehT	T	Signal transduction mechanism	predicted response regulator in two-component system withYehU
2088375	2089125	7.13628	1.96519	2088216	2089115	hisG	E	Amino acid transport and metabolism	ATP phosphoribosyltransferase
2088375	2089125	7.13628	1.96519	2089121	2090425	hisD	-	not classify	histidinol dehydrogenase
1300750	1302000	7.05539	1.95379	1299206	1300837	oppA	E	Amino acid transport and metabolism	oligopeptide transporter subunit
1300750	1302000	7.05539	1.95379	1300923	1301843	oppB	P	Inorganic ion transport and metabolism	oligopeptide permease ABC transporter membrane protein
1300750	1302000	7.05539	1.95379	1301858	1302766	oppC	P	Inorganic ion transport and metabolism	oligopeptide transporter subunit
4426375	4427125	7.05042	1.95309	4426102	4426740	ytfB	M	Cell envelope biogenesis, outer membrane	predicted cell envelope opacity-associated protein
4426375	4427125	7.05042	1.95309	4426958	4427578	fklB	O	Posttranslational modification, protein turnover, chaperones	FKBP-type peptidyl-prolyl cis-trans isomerase (rotamase)
899750	901000	6.90388	1.93208	899067	899798	artJ	T	Signal transduction mechanism	arginine transporter subunit
899750	901000	6.90388	1.93208	900089	900757	artM	E	Amino acid transport and metabolism	arginine transporter subunit
899750	901000	6.90388	1.93208	900757	901473	artQ	E	Amino acid transport and metabolism	arginine transporter subunit
3033625	3034375	6.81473	1.91909	3033206	3034304	prfB	J	Translation, ribosomal structure and biogenesis	peptide chain release factor 2
3033750	3034250	6.81473	1.91909	3033206	3034304	prfB	J	Translation, ribosomal structure and biogenesis	peptide chain release factor 2
1502875	1503625	6.77022	1.91253	1501681	1502889	ydcM	L	DNA replication, recombination and repair	predicted transposase
1502875	1503625	6.77022	1.91253	1502929	1504104	ydcO	Q	Secondary metabolites biosynthesis, transport and catabolism	predicted benzoate transporter
542875	543375	6.746	1.90895	542485	543270	ylbA	R	General function prediction only	hypothetical protein
542875	543375	6.746	1.90895	543281	544516	allC	E	Amino acid transport and metabolism	N-carbamoyl-L-amino acid amidohydrolase
964000	965000	6.73983	1.90803	963543	965807	ycaI	R	General function prediction only	conserved inner membrane protein
4241625	4243125	6.73573	1.90743	4241554	4243098	malF	G	Carbohydrate transport and metabolism	maltose transporter subunit
4456250	4456750	6.6651	1.89689	4455982	4457334	pmbA	R	General function prediction only	predicted peptidase required for the maturation and secretion of the antibiotic peptide MccB17
2088375	2089375	6.58023	1.88407	2088216	2089115	hisG	E	Amino acid transport and metabolism	ATP phosphoribosyltransferase
2088375	2089375	6.58023	1.88407	2089121	2090425	hisD	-	not classify	histidinol dehydrogenase
305000	306500	6.46116	1.86581	304398	306041	yagW	-	not classify	predicted receptor
305000	306500	6.46116	1.86581	306031	308556	yagX	-	not classify	predicted aromatic compound dioxygenase
2209375	2210625	6.42368	1.85999	2209247	2209708	yehR	-	not classify	hypothetical protein
2209375	2210625	6.42368	1.85999	2209748	2210218	yehS	-	not classify	hypothetical protein
2209375	2210625	6.42368	1.85999	2210265	2210984	yehT	T	Signal transduction mechanism	predicted response regulator in two-component system withYehU
1300875	1301875	6.3266	1.84476	1301858	1302766	oppC	P	Inorganic ion transport and metabolism	oligopeptide transporter subunit
3854625	3855375	6.28232	1.83774	3854438	3854887	yidI	-	not classify	predicted inner membrane protein
3854625	3855375	6.28232	1.83774	3854934	3856427	yidJ	P	Inorganic ion transport and metabolism	predicted sulfatase/phosphatase
2686125	2686625	6.17341	1.82025	2685491	2686825	yfhA	T	Signal transduction mechanism	predicted DNA-binding response regulator in two-component system
1753875	1755125	6.16677	1.81917	1753722	1755134	pykF	-	not classify	pyruvate kinase
2833625	2834375	6.11847	1.81131	2833195	2835447	hypF	O	Posttranslational modification, protein turnover, chaperones	carbamoyl phosphate phosphatase and maturation protein for [NiFe] hydrogenases
1796000	1797000	5.96634	1.78613	1795983	1796966	pheS	J	Translation, ribosomal structure and biogenesis	phenylalanyl-tRNA synthetase alpha subunit
2858500	2859750	5.90593	1.77596	2858489	2859286	ygbI	G	Carbohydrate transport and metabolism	predicted DNA-binding transcriptional regulator
2858500	2859750	5.90593	1.77596	2859452	2860360	ygbJ	I	Lipid metabolism	predicted dehydrogenase, with NAD(P)-binding Rossmann-fold domain
2949750	2950250	5.86191	1.76847	2948657	2950483	recD	L	DNA replication, recombination and repair	exonuclease V (RecBCD complex), alpha chain
2756250	2757250	5.76184	1.75126	2755666	2756622	yfjH	-	not classify	CP4-57 prophage; predicted protein
2756250	2757250	5.76184	1.75126	2756666	2756878	alpA	K	Transcription	CP4-57 prophage; DNA-binding transcriptional activator
2756250	2757250	5.76184	1.75126	2757007	2758416	yfjI	-	not classify	CP4-57 prophage; predicted protein
1454625	1456375	5.67219	1.73558	1454454	1455524	paaE	C	Energy production and conversion	predicted multicomponent oxygenase/reductase subunit for phenylacetic acid degradation
1454625	1456375	5.67219	1.73558	1455521	1456288	paaF	I	Lipid metabolism	enoyl-CoA hydratase-isomerase
1454625	1456375	5.67219	1.73558	1456288	1457076	paaG	I	Lipid metabolism	enoyl-CoA hydratase
4625000	4626000	5.66954	1.73511	4623935	4625317	radA	O	Posttranslational modification, protein turnover, chaperones	predicted repair protein
4625000	4626000	5.66954	1.73511	4625338	4626570	nadR	H	Coenzyme metabolism	nicotinamide-nucleotide adenylyltransferase
3762000	3765250	5.63046	1.72819	3760206	3764339	rhsA	M	Cell envelope biogenesis, outer membrane	rhsA element core protein RshA
3762000	3765250	5.63046	1.72819	3764360	3765202	yibA	C	Energy production and conversion	lyase containing HEAT-repeat
3762000	3765250	5.63046	1.72819	3765244	3765945	yibJ	M	Cell envelope biogenesis, outer membrane	predicted Rhs-family protein
3712250	3714500	5.52608	1.70948	3712084	3714363	bisC	C	Energy production and conversion	biotin sulfoxide reductase
1567625	1568625	5.42847	1.69166	1566978	1568513	gadC	E	Amino acid transport and metabolism	predicted glutamate:gamma-aminobutyric acid antiporter
1555500	1556000	5.39419	1.68532	1555136	1556062	ddpF	P	Inorganic ion transport and metabolism	D-ala-D-ala transporter subunit
2929750	2930750	5.35301	1.67766	2928987	2929832	xni	L	DNA replication, recombination and repair	exonuclease IX
2929750	2930750	5.35301	1.67766	2929887	2931038	fucO	C	Energy production and conversion	L-1,2-propanediol oxidoreductase
2632750	2633750	5.17305	1.64346	2632254	2633624	xseA	L	DNA replication, recombination and repair	exodeoxyribonuclease VII large subunit
2632750	2633750	5.17305	1.64346	2633621	2633836	yfgJ	-	not classify	hypothetical protein
2439000	2439750	5.12169	1.63348	2438407	2439627	fabB	Q	Secondary metabolites biosynthesis, transport and catabolism	3-oxoacyl-(acyl carrier protein) synthase
382625	383625	5.09136	1.62755	381963	383159	yaiP	M	Cell envelope biogenesis, outer membrane	predicted glucosyltransferase
382625	383625	5.09136	1.62755	383283	383840	yaiS	S	Function unknown	hypothetical protein
2334000	2335250	5.03256	1.61593	2332978	2334666	yfaA	S	Function unknown	hypothetical protein
2334000	2335250	5.03256	1.61593	2334815	2337442	gyrA	L	DNA replication, recombination and repair	DNA gyrase subunit A
1671625	1672375	5.00172	1.60978	1671937	1672971	ydgG	R	General function prediction only	predicted inner membrane protein
436250	437000	4.99614	1.60867	435813	436331	pgpA	I	Lipid metabolism	phosphatidylglycerophosphatase A
436250	437000	4.99614	1.60867	436385	437359	yajO	C	Energy production and conversion	predicted oxidoreductase, NAD(P)-binding
178500	180000	4.89966	1.58917	178455	179153	pfs	F	Nucleotide transport and metabolism	5'-methylthioadenosine/S-adenosylhomocysteine nucleosidase
178500	180000	4.89966	1.58917	179237	180754	dgt	F	Nucleotide transport and metabolism	deoxyguanosinetriphosphate triphosphohydrolase
640875	641625	4.87153	1.58341	640662	641090	uspG	T	Signal transduction mechanism	universal stress protein UP12
640875	641625	4.87153	1.58341	641311	642549	ybdR	R	General function prediction only	predicted oxidoreductase, Zn-dependent and NAD(P)-binding
1999000	1999500	4.84744	1.57845	1998497	1999048	fliZ	-	not classify	predicted regulator of FliA activity
1999000	1999500	4.84744	1.57845	1999094	1999813	fliA	K	Transcription	flagellar biosynthesis sigma factor
2353375	2354625	4.74934	1.55801	2352287	2353546	glpB	E	Amino acid transport and metabolism	anaerobic glycerol-3-phosphate dehydrogenase subunit B
2353375	2354625	4.74934	1.55801	2353543	2354733	glpC	C	Energy production and conversion	sn-glycerol-3-phosphate dehydrogenase (anaerobic), small subunit
2391750	2393500	4.57724	1.5211	2391227	2393068	nuoL	P	Inorganic ion transport and metabolism	NADH dehydrogenase subunit L
2391750	2393500	4.57724	1.5211	2393065	2393367	nuoK	C	Energy production and conversion	NADH dehydrogenase subunit K
2391750	2393500	4.57724	1.5211	2393364	2393918	nuoJ	C	Energy production and conversion	NADH dehydrogenase subunit J
809750	810750	4.50935	1.50615	809604	810758	bioF	H	Coenzyme metabolism	8-amino-7-oxononanoate synthase
809750	810750	4.50935	1.50615	810745	811500	bioC	R	General function prediction only	predicted methltransferase, enzyme of biotin synthesis
470000	471750	4.47347	1.49816	469860	471641	mdlB	V	Defense mechanisms	fused predicted multidrug transporter subunits of ABC superfamily: ATP-binding components
899750	901250	4.41237	1.48441	899067	899798	artJ	T	Signal transduction mechanism	arginine transporter subunit
899750	901250	4.41237	1.48441	900089	900757	artM	E	Amino acid transport and metabolism	arginine transporter subunit
899750	901250	4.41237	1.48441	900757	901473	artQ	E	Amino acid transport and metabolism	arginine transporter subunit
4413750	4414250	4.41074	1.48404	4412298	4413923	aidB	I	Lipid metabolism	isovaleryl CoA dehydrogenase
4413750	4414250	4.41074	1.48404	4414040	4414315	yjfN	-	not classify	hypothetical protein
3200750	3201500	4.4024	1.48215	3199913	3201151	cca	J	Translation, ribosomal structure and biogenesis	fused tRNA nucleotidyl transferase/2'3'-cyclic phosphodiesterase/2'nucleotidase and phosphatase
3200750	3201500	4.4024	1.48215	3201332	3202153	uppP	-	not classify	undecaprenyl pyrophosphate phosphatase
2324250	2325250	4.35071	1.47034	2324131	2325315	atoB	I	Lipid metabolism	acetyl-CoA acetyltransferase
1578250	1579750	4.29618	1.45773	1577657	1578814	ydeM	R	General function prediction only	hypothetical protein
1578250	1579750	4.29618	1.45773	1578866	1580548	ydeN	P	Inorganic ion transport and metabolism	hypothetical protein
2629625	2631375	4.29346	1.45709	2628980	2630557	guaA	F	Nucleotide transport and metabolism	bifunctional GMP synthase/glutamine amidotransferase protein
2629625	2631375	4.29346	1.45709	2630626	2632092	guaB	R	General function prediction only	inositol-5-monophosphate dehydrogenase
2937250	2938500	4.28373	1.45482	2936910	2937332	fucU	G	Carbohydrate transport and metabolism	L-fucose mutarotase
2937250	2938500	4.28373	1.45482	2937390	2938121	fucR	G	Carbohydrate transport and metabolism	DNA-binding transcriptional activator
2937250	2938500	4.28373	1.45482	2938165	2939265	ygdE	R	General function prediction only	predicted methyltransferase
3501500	3502500	4.25229	1.44746	3501189	3501974	frlD	G	Carbohydrate transport and metabolism	fructoselysine 6-kinase
3501500	3502500	4.25229	1.44746	3502074	3502805	frlR	K	Transcription	predicted DNA-binding transcriptional regulator
4049125	4049625	4.24756	1.44634	4049370	4049879	yihI	-	not classify	hypothetical protein
4509500	4510000	4.18427	1.43133	4509481	4510437	fecD	P	Inorganic ion transport and metabolism	KpLE2 phage-like element; iron-dicitrate transporter subunit
767375	769125	4.16312	1.42627	767201	769834	mngB	G	Carbohydrate transport and metabolism	alpha-mannosidase
4426500	4427000	4.13384	1.41921	4426102	4426740	ytfB	M	Cell envelope biogenesis, outer membrane	predicted cell envelope opacity-associated protein
4426500	4427000	4.13384	1.41921	4426958	4427578	fklB	O	Posttranslational modification, protein turnover, chaperones	FKBP-type peptidyl-prolyl cis-trans isomerase (rotamase)
3016000	3019500	4.12133	1.41618	3014082	3017180	ygfK	R	General function prediction only	predicted oxidoreductase, Fe-S subunit
3016000	3019500	4.12133	1.41618	3017183	3018511	ssnA	R	General function prediction only	putative chlorohydrolase/aminohydrolase
3016000	3019500	4.12133	1.41618	3018562	3019341	ygfM	-	not classify	predicted oxidoreductase
3016000	3019500	4.12133	1.41618	3019338	3022208	xdhD	C	Energy production and conversion	fused predicted xanthine/hypoxanthine oxidase: molybdopterin-binding subunit/Fe-S binding subunit
2464875	2465875	4.11086	1.41363	2464567	2465724	intS	L	DNA replication, recombination and repair	CPS-53 (KpLE1) prophage; predicted prophage CPS-53 integrase
2024000	2025000	4.07228	1.4042	2023535	2024350	yedP	R	General function prediction only	hypothetical protein
2024000	2025000	4.07228	1.4042	2024347	2026041	yedQ	-	not classify	predicted diguanylate cyclase
2140000	2143250	4.0614	1.40153	2139658	2140239	dcd	F	Nucleotide transport and metabolism	deoxycytidine triphosphate deaminase
2140000	2143250	4.0614	1.40153	2140331	2140972	udk	F	Nucleotide transport and metabolism	uridine kinase
2140000	2143250	4.0614	1.40153	2141290	2144607	yegE	T	Signal transduction mechanism	predicted diguanylate cyclase, GGDEF domain signalling protein
2002250	2003250	4.05967	1.4011	2001896	2003302	fliD	N	Cell motility and secretion	flagellar capping protein
179000	180000	4.05738	1.40054	178455	179153	pfs	F	Nucleotide transport and metabolism	5'-methylthioadenosine/S-adenosylhomocysteine nucleosidase
179000	180000	4.05738	1.40054	179237	180754	dgt	F	Nucleotide transport and metabolism	deoxyguanosinetriphosphate triphosphohydrolase
3195375	3197125	4.03102	1.39402	3194823	3197663	glnE	T	Signal transduction mechanism	fused deadenylyltransferase/adenylyltransferase for glutamine synthetase
204875	206375	4.01279	1.38949	204493	205089	rnhB	L	DNA replication, recombination and repair	ribonuclease HII
204875	206375	4.01279	1.38949	205126	208608	dnaE	L	DNA replication, recombination and repair	DNA polymerase III subunit alpha
4063500	4064000	3.9971	1.38557	4062386	4063789	yihO	G	Carbohydrate transport and metabolism	predited transporter
4063500	4064000	3.9971	1.38557	4063832	4065238	yihP	G	Carbohydrate transport and metabolism	predicted transporter
4229125	4229875	3.99106	1.38406	4228377	4229249	yjbC	J	Translation, ribosomal structure and biogenesis	23S rRNA pseudouridine synthase
4229125	4229875	3.99106	1.38406	4229382	4229654	yjbD	-	not classify	hypothetical protein
2249250	2249750	3.94677	1.3729	2248862	2249719	nfo	L	DNA replication, recombination and repair	endonuclease IV
2249250	2249750	3.94677	1.3729	2249722	2250810	yeiI	G	Carbohydrate transport and metabolism	predicted kinase
2377500	2378000	3.93751	1.37055	2377370	2378665	menF	Q	Secondary metabolites biosynthesis, transport and catabolism	menaquinone-specific isochorismate synthase
1513750	1515000	3.89548	1.35982	1513602	1515026	ydcW	C	Energy production and conversion	medium chain aldehyde dehydrogenase
4229125	4229625	3.85496	1.34936	4228377	4229249	yjbC	J	Translation, ribosomal structure and biogenesis	23S rRNA pseudouridine synthase
4229125	4229625	3.85496	1.34936	4229382	4229654	yjbD	-	not classify	hypothetical protein
325375	326875	3.76024	1.32448	324801	326471	betA	E	Amino acid transport and metabolism	choline dehydrogenase
325375	326875	3.76024	1.32448	326485	327957	betB	C	Energy production and conversion	betaine aldehyde dehydrogenase, NAD-dependent
1147375	1148125	3.74109	1.31938	1146844	1147914	plsX	I	Lipid metabolism	fatty acid/phospholipid synthesis protein
1147375	1148125	3.74109	1.31938	1147982	1148935	fabH	I	Lipid metabolism	3-oxoacyl-(acyl carrier protein) synthase
1454625	1456625	3.67351	1.30115	1454454	1455524	paaE	C	Energy production and conversion	predicted multicomponent oxygenase/reductase subunit for phenylacetic acid degradation
1454625	1456625	3.67351	1.30115	1455521	1456288	paaF	I	Lipid metabolism	enoyl-CoA hydratase-isomerase
1454625	1456625	3.67351	1.30115	1456288	1457076	paaG	I	Lipid metabolism	enoyl-CoA hydratase
963875	965125	3.66452	1.2987	963543	965807	ycaI	R	General function prediction only	conserved inner membrane protein
4621125	4622125	3.65578	1.29631	4621124	4622140	lplA	H	Coenzyme metabolism	lipoate-protein ligase A
1624750	1625500	3.63027	1.28931	1623359	1625404	dcp	E	Amino acid transport and metabolism	dipeptidyl carboxypeptidase II
3470125	3472375	3.61646	1.2855	3469422	3471536	fusA	J	Translation, ribosomal structure and biogenesis	elongation factor EF-2
3470125	3472375	3.61646	1.2855	3471564	3472103	rpsG	J	Translation, ribosomal structure and biogenesis	30S ribosomal protein S7
3470125	3472375	3.61646	1.2855	3472200	3472574	rpsL	-	not classify	30S ribosomal protein S12
4383500	4384000	3.59816	1.28042	4383416	4383730	yjeN	-	not classify	hypothetical protein
4383500	4384000	3.59816	1.28042	4383727	4384041	yjeO	-	not classify	conserved inner membrane protein
2666625	2667625	3.55644	1.26876	2666028	2666918	hcaR	K	Transcription	DNA-binding transcriptional activator of 3-phenylpropionic acid catabolism
2666625	2667625	3.55644	1.26876	2667054	2668415	hcaE	R	General function prediction only	3-phenylpropionate dioxygenase, large (alpha) subunit
3101375	3102375	3.52255	1.25918	3101035	3102087	mutY	L	DNA replication, recombination and repair	adenine DNA glycosylase
3101375	3102375	3.52255	1.25918	3102115	3102390	yggX	-	not classify	hypothetical protein
3846750	3848250	3.51814	1.25793	3846657	3848159	uhpB	T	Signal transduction mechanism	sensory histidine kinase in two-component regulatory sytem with UhpA
3846750	3848250	3.51814	1.25793	3848159	3848749	uhpA	K	Transcription	DNA-binding response regulator in two-component regulatory system wtih UhpB
3527500	3528250	3.45356	1.23941	3527370	3527771	hslR	J	Translation, ribosomal structure and biogenesis	ribosome-associated heat shock protein Hsp15
3527500	3528250	3.45356	1.23941	3527796	3528674	hslO	-	not classify	Hsp33-like chaperonin
1026500	1028000	3.44335	1.23645	1026334	1026996	yccT	-	not classify	hypothetical protein
1026500	1028000	3.44335	1.23645	1027169	1027582	yccU	R	General function prediction only	predicted CoA-binding protein with NAD(P)-binding Rossmann-fold domain
1026500	1028000	3.44335	1.23645	1027627	1027995	yccV	S	Function unknown	DNA-binding protein, hemimethylated
3562625	3564625	3.42337	1.23063	3562157	3564604	glgP	G	Carbohydrate transport and metabolism	glycogen phosphorylase
3562625	3564625	3.42337	1.23063	3564623	3566056	glgA	G	Carbohydrate transport and metabolism	glycogen synthase
1953750	1955500	3.41956	1.22951	1952602	1955031	torZ	C	Energy production and conversion	trimethylamine N-oxide reductase system III, catalytic subunit
1953750	1955500	3.41956	1.22951	1955056	1956156	torY	C	Energy production and conversion	TMAO reductase III (TorYZ), cytochrome c-type subunit
3401500	3402250	3.41846	1.22919	3401506	3402480	yhdH	R	General function prediction only	predicted oxidoreductase, Zn-dependent and NAD(P)-binding
290000	291000	3.41337	1.2277	289873	290376	insB-3	L	DNA replication, recombination and repair	CP4-6 prophage; IS1 transposase InsAB'
290000	291000	3.41337	1.2277	290295	290570	insA-3	L	DNA replication, recombination and repair	CP4-6 prophage; IS1 repressor protein InsA
290000	291000	3.41337	1.2277	290724	291455	yagJ	-	not classify	CP4-6 prophage; predicted protein
1958625	1959625	3.33271	1.20379	1958086	1959819	argS	J	Translation, ribosomal structure and biogenesis	arginyl-tRNA synthetase
1107625	1108375	3.32872	1.20259	1107007	1108164	mdoC	-	not classify	glucans biosynthesis protein
3955250	3956000	3.32511	1.2015	3954950	3955843	ilvY	K	Transcription	DNA-binding transcriptional dual regulator
3955250	3956000	3.32511	1.2015	3955993	3957468	ilvC	H	Coenzyme metabolism	ketol-acid reductoisomerase
2297875	2298875	3.31965	1.19986	2297587	2298282	napG	C	Energy production and conversion	quinol dehydrogenase periplasmic component
2297875	2298875	3.31965	1.19986	2298289	2300775	napA	C	Energy production and conversion	nitrate reductase, periplasmic, large subunit
4000000	4000750	3.29229	1.19158	3999449	4000399	corA	P	Inorganic ion transport and metabolism	magnesium/nickel/cobalt transporter
4000000	4000750	3.29229	1.19158	4000442	4000822	yigF	-	not classify	conserved inner membrane protein
367625	368875	3.27578	1.18656	366811	367758	mhpR	K	Transcription	DNA-binding transcriptional activator, 3HPP-binding
367625	368875	3.27578	1.18656	367835	369499	mhpA	C	Energy production and conversion	3-(3-hydroxyphenyl)propionate hydroxylase
1953625	1955625	3.27166	1.1853	1952602	1955031	torZ	C	Energy production and conversion	trimethylamine N-oxide reductase system III, catalytic subunit
1953625	1955625	3.27166	1.1853	1955056	1956156	torY	C	Energy production and conversion	TMAO reductase III (TorYZ), cytochrome c-type subunit
3460750	3461750	3.26119	1.18209	3460366	3460953	gspJ	U	Intracellular trafficking, secretion,and vesicular transport	predicted general secretory pathway component, cryptic
3460750	3461750	3.26119	1.18209	3460946	3461929	gspK	U	Intracellular trafficking, secretion,and vesicular transport	general secretory pathway component, cryptic
1874625	1875875	3.24136	1.17599	1873697	1874878	yeaN	P	Inorganic ion transport and metabolism	predicted transporter
1874625	1875875	3.24136	1.17599	1874933	1875280	yeaO	S	Function unknown	hypothetical protein
1874625	1875875	3.24136	1.17599	1875302	1875556	yoaF	R	General function prediction only	conserved outer membrane protein
1874625	1875875	3.24136	1.17599	1875739	1876764	yeaP	-	not classify	predicted diguanylate cyclase
3377000	3377750	3.24115	1.17593	3376892	3378019	yhcM	R	General function prediction only	conserved protein with nucleoside triphosphate hydrolase domain
2145250	2146000	3.23675	1.17457	2144716	2145564	alkA	L	DNA replication, recombination and repair	3-methyl-adenine DNA glycosylase II
2145250	2146000	3.23675	1.17457	2145698	2147050	yegD	O	Posttranslational modification, protein turnover, chaperones	predicted chaperone
4485875	4488375	3.19883	1.16279	4485341	4486423	yjgQ	-	not classify	conserved inner membrane protein
4485875	4488375	3.19883	1.16279	4486584	4488086	yjgR	R	General function prediction only	predicted ATPase
4485875	4488375	3.19883	1.16279	4488164	4489162	idnR	K	Transcription	DNA-binding transcriptional repressor, 5-gluconate-binding
248875	249875	3.19845	1.16267	248358	250070	fhiA	U	Intracellular trafficking, secretion,and vesicular transport	flagellar system protein, promoterless fragment (pseudogene)
2470625	2471625	3.18787	1.15935	2470409	2470903	yfdN	-	not classify	CPS-53 (KpLE1) prophage; predicted protein
2470625	2471625	3.18787	1.15935	2470900	2471268	yfdO	-	not classify	CPS-53 (KpLE1) prophage; predicted defective phage replication protein O
2470625	2471625	3.18787	1.15935	2471542	2471988	yfdP	-	not classify	CPS-53 (KpLE1) prophage; predicted protein
3096625	3097375	3.18093	1.15717	3096580	3097587	yggM	-	not classify	hypothetical protein
3446125	3446625	3.15242	1.14817	3445800	3446171	rplN	-	not classify	50S ribosomal protein L14
3446125	3446625	3.15242	1.14817	3446336	3446590	rpsQ	J	Translation, ribosomal structure and biogenesis	30S ribosomal protein S17
3446125	3446625	3.15242	1.14817	3446590	3446781	rpmC	-	not classify	50S ribosomal protein L29
3544750	3545500	3.14066	1.14443	3544581	3545897	gntT	E	Amino acid transport and metabolism	gluconate transporter, high-affinity GNT I system
4587000	4587750	3.13653	1.14312	4586899	4587102	yjiX	-	not classify	hypothetical protein
4587000	4587750	3.13653	1.14312	4587152	4589302	yjiY	T	Signal transduction mechanism	predicted inner membrane protein
2228125	2228625	3.1319	1.14164	2227460	2228407	dusC	J	Translation, ribosomal structure and biogenesis	tRNA-dihydrouridine synthase C
2890250	2890750	3.10822	1.13405	2890236	2890601	ygcM	H	Coenzyme metabolism	6-pyruvoyl tetrahydrobiopterin synthase (PTPS)
2890250	2890750	3.10822	1.13405	2890679	2891950	ygcN	C	Energy production and conversion	predicted oxidoreductase with FAD/NAD(P)-binding domain
2024000	2026750	3.08794	1.12751	2023535	2024350	yedP	R	General function prediction only	hypothetical protein
2024000	2026750	3.08794	1.12751	2024347	2026041	yedQ	-	not classify	predicted diguanylate cyclase
2024000	2026750	3.08794	1.12751	2026212	2026394	yodC	S	Function unknown	hypothetical protein
2024000	2026750	3.08794	1.12751	2026473	2027390	yedI	S	Function unknown	conserved inner membrane protein
2934500	2935250	3.08469	1.12645	2933606	2935381	fucI	G	Carbohydrate transport and metabolism	L-fucose isomerase
2252875	2253625	3.06868	1.12125	2252267	2253208	rihB	F	Nucleotide transport and metabolism	ribonucleoside hydrolase 2
2252875	2253625	3.06868	1.12125	2253377	2254036	yeiL	T	Signal transduction mechanism	DNA-binding transcriptional activator of stationary phase nitrogen survival
4278250	4279000	3.06332	1.1195	4278003	4279652	yjcE	P	Inorganic ion transport and metabolism	predicted cation/proton antiporter
1567500	1568750	3.06281	1.11933	1566978	1568513	gadC	E	Amino acid transport and metabolism	predicted glutamate:gamma-aminobutyric acid antiporter
1567500	1568750	3.06281	1.11933	1568669	1570069	gadB	E	Amino acid transport and metabolism	glutamate decarboxylase B, PLP-dependent
1863500	1864500	3.06142	1.11888	1862806	1863660	yeaE	R	General function prediction only	predicted oxidoreductase
1863500	1864500	3.06142	1.11888	1863750	1864496	mipA	-	not classify	scaffolding protein for murein synthesizing machinery
3828625	3831125	3.02683	1.10752	3828480	3830189	yicH	-	not classify	hypothetical protein
3828625	3831125	3.02683	1.10752	3830242	3832560	yicI	G	Carbohydrate transport and metabolism	predicted alpha-glucosidase
539250	539750	3.02037	1.10538	538371	539732	allB	F	Nucleotide transport and metabolism	allantoinase
2245625	2246875	3.01784	1.10454	2245085	2246554	lysP	E	Amino acid transport and metabolism	lysine transporter
2245625	2246875	3.01784	1.10454	2246759	2247640	yeiE	K	Transcription	predicted DNA-binding transcriptional regulator
2353250	2354750	3.0158	1.10387	2352287	2353546	glpB	E	Amino acid transport and metabolism	anaerobic glycerol-3-phosphate dehydrogenase subunit B
2353250	2354750	3.0158	1.10387	2353543	2354733	glpC	C	Energy production and conversion	sn-glycerol-3-phosphate dehydrogenase (anaerobic), small subunit
4053500	4054250	2.99802	1.09795	4053313	4054362	glnL	T	Signal transduction mechanism	sensory histidine kinase in two-component regulatory system with GlnG
1244875	1245375	2.99146	1.09576	1244902	1246599	treA	G	Carbohydrate transport and metabolism	periplasmic trehalase
1274625	1277375	2.97199	1.08923	1274402	1275052	narL	K	Transcription	DNA-binding response regulator in two-component regulatory system with NarX (or NarQ)
1274625	1277375	2.97199	1.08923	1275045	1276841	narX	T	Signal transduction mechanism	sensory histidine kinase in two-component regulatory system with NarL
1274625	1277375	2.97199	1.08923	1277180	1278571	narK	P	Inorganic ion transport and metabolism	nitrate/nitrite transporter
1103375	1104875	2.96354	1.08639	1103174	1103629	csgB	-	not classify	curlin nucleator protein, minor subunit in curli complex
1103375	1104875	2.96354	1.08639	1103670	1104125	csgA	-	not classify	cryptic curlin major subunit
1103375	1104875	2.96354	1.08639	1104184	1104516	csgC	-	not classify	predicted curli production protein
1103375	1104875	2.96354	1.08639	1104637	1104948	ymdA	-	not classify	hypothetical protein
542750	543750	2.95127	1.08223	542485	543270	ylbA	R	General function prediction only	hypothetical protein
542750	543750	2.95127	1.08223	543281	544516	allC	E	Amino acid transport and metabolism	N-carbamoyl-L-amino acid amidohydrolase
1571000	1572750	2.94824	1.08121	1570431	1573226	pqqL	R	General function prediction only	predicted peptidase
1327625	1328125	2.93446	1.07652	1327356	1328405	sohB	U	Intracellular trafficking, secretion,and vesicular transport	predicted inner membrane peptidase
2002125	2003875	2.90252	1.06558	2001896	2003302	fliD	N	Cell motility and secretion	flagellar capping protein
2002125	2003875	2.90252	1.06558	2003327	2003737	fliS	O	Posttranslational modification, protein turnover, chaperones	flagellar protein FliS
2002125	2003875	2.90252	1.06558	2003737	2004102	fliT	-	not classify	predicted chaperone
1970250	1971250	2.8933	1.0624	1969054	1970715	tar	T	Signal transduction mechanism	methyl-accepting chemotaxis protein II
1970250	1971250	2.8933	1.0624	1970860	1971363	cheW	T	Signal transduction mechanism	purine-binding chemotaxis protein
1513750	1515250	2.88741	1.06036	1513602	1515026	ydcW	C	Energy production and conversion	medium chain aldehyde dehydrogenase
1874500	1876000	2.88255	1.05868	1873697	1874878	yeaN	P	Inorganic ion transport and metabolism	predicted transporter
1874500	1876000	2.88255	1.05868	1874933	1875280	yeaO	S	Function unknown	hypothetical protein
1874500	1876000	2.88255	1.05868	1875302	1875556	yoaF	R	General function prediction only	conserved outer membrane protein
1874500	1876000	2.88255	1.05868	1875739	1876764	yeaP	-	not classify	predicted diguanylate cyclase
4032875	4034875	2.87988	1.05775	4032631	4033176	hemG	H	Coenzyme metabolism	protoporphyrin oxidase, flavoprotein
2975625	2976125	2.87264	1.05523	2974621	2975652	galR	K	Transcription	DNA-binding transcriptional repressor
2975625	2976125	2.87264	1.05523	2975659	2976921	lysA	E	Amino acid transport and metabolism	diaminopimelate decarboxylase, PLP-binding
4509375	4510625	2.87102	1.05467	4508713	4509480	fecE	H	Coenzyme metabolism	KpLE2 phage-like element; iron-dicitrate transporter subunit
4509375	4510625	2.87102	1.05467	4509481	4510437	fecD	P	Inorganic ion transport and metabolism	KpLE2 phage-like element; iron-dicitrate transporter subunit
4509375	4510625	2.87102	1.05467	4510434	4511432	fecC	P	Inorganic ion transport and metabolism	KpLE2 phage-like element; iron-dicitrate transporter subunit
4247375	4247875	2.86738	1.0534	4247577	4248497	malM	-	not classify	maltose regulon periplasmic protein
462625	463125	2.86609	1.05295	461139	463010	ppiD	O	Posttranslational modification, protein turnover, chaperones	peptidyl-prolyl cis-trans isomerase (rotamase D)
4047125	4047875	2.86449	1.05239	4044989	4047775	polA	L	DNA replication, recombination and repair	DNA polymerase I
2355750	2356250	2.86107	1.05119	2354926	2355825	yfaD	S	Function unknown	hypothetical protein
2355750	2356250	2.86107	1.05119	2356064	2356867	yfaU	G	Carbohydrate transport and metabolism	predicted 2,4-dihydroxyhept-2-ene-1,7-dioic acid aldolase
3703750	3704250	2.85654	1.04961	3702794	3703813	dppB	P	Inorganic ion transport and metabolism	dipeptide transporter
3703750	3704250	2.85654	1.04961	3704121	3705728	dppA	E	Amino acid transport and metabolism	dipeptide transporter
3218000	3218500	2.84925	1.04706	3217489	3218895	ygjG	E	Amino acid transport and metabolism	putrescine:2-oxoglutaric acid aminotransferase, PLP-dependent
1624625	1625625	2.83788	1.04306	1623359	1625404	dcp	E	Amino acid transport and metabolism	dipeptidyl carboxypeptidase II
1624625	1625625	2.83788	1.04306	1625541	1626287	ydfG	R	General function prediction only	L-allo-threonine dehydrogenase, NAD(P)-binding
2438875	2439875	2.83707	1.04277	2438407	2439627	fabB	Q	Secondary metabolites biosynthesis, transport and catabolism	3-oxoacyl-(acyl carrier protein) synthase
2438875	2439875	2.83707	1.04277	2439786	2441792	yfcK	S	Function unknown	hypothetical protein
2151875	2153625	2.8315	1.04081	2153287	2156409	mdtB	V	Defense mechanisms	multidrug efflux system, subunit B
4547500	4548000	2.82148	1.03726	4546831	4547733	fimH	-	not classify	minor component of type 1 fimbriae
4547500	4548000	2.82148	1.03726	4547976	4549319	gntP	E	Amino acid transport and metabolism	fructuronate transporter
2252750	2253750	2.81891	1.03635	2252267	2253208	rihB	F	Nucleotide transport and metabolism	ribonucleoside hydrolase 2
2252750	2253750	2.81891	1.03635	2253377	2254036	yeiL	T	Signal transduction mechanism	DNA-binding transcriptional activator of stationary phase nitrogen survival
3992750	3993250	2.81425	1.03469	3992785	3993609	dapF	E	Amino acid transport and metabolism	diaminopimelate epimerase
1610875	1612125	2.81353	1.03444	1610349	1611275	yneH	-	not classify	predicted glutaminase
1610875	1612125	2.81353	1.03444	1611339	1612727	yneI	C	Energy production and conversion	predicted aldehyde dehydrogenase
7875	8375	2.79922	1.02934	6529	7959	yaaJ	E	Amino acid transport and metabolism	predicted transporter
7875	8375	2.79922	1.02934	8238	9191	talB	-	not classify	transaldolase B
2814750	2815250	2.79271	1.02701	2814534	2814962	yqaA	S	Function unknown	conserved inner membrane protein
2814750	2815250	2.79271	1.02701	2814959	2815525	yqaB	R	General function prediction only	predicted hydrolase
2147625	2149375	2.78134	1.02293	2147063	2149009	yegI	R	General function prediction only	hypothetical protein
2147625	2149375	2.78134	1.02293	2149209	2149670	yegJ	S	Function unknown	hypothetical protein
1874250	1876000	2.77956	1.02229	1873697	1874878	yeaN	P	Inorganic ion transport and metabolism	predicted transporter
1874250	1876000	2.77956	1.02229	1874933	1875280	yeaO	S	Function unknown	hypothetical protein
1874250	1876000	2.77956	1.02229	1875302	1875556	yoaF	R	General function prediction only	conserved outer membrane protein
1874250	1876000	2.77956	1.02229	1875739	1876764	yeaP	-	not classify	predicted diguanylate cyclase
3740000	3740500	2.77076	1.01912	3739707	3740555	yiaJ	K	Transcription	predicted DNA-binding transcriptional repressor
3018625	3019625	2.76643	1.01756	3018562	3019341	ygfM	-	not classify	predicted oxidoreductase
3018625	3019625	2.76643	1.01756	3019338	3022208	xdhD	C	Energy production and conversion	fused predicted xanthine/hypoxanthine oxidase: molybdopterin-binding subunit/Fe-S binding subunit
2349875	2350875	2.76592	1.01737	2349038	2350396	glpT	G	Carbohydrate transport and metabolism	sn-glycerol-3-phosphate transporter
2349875	2350875	2.76592	1.01737	2350669	2352297	glpA	C	Energy production and conversion	sn-glycerol-3-phosphate dehydrogenase (anaerobic), large subunit, FAD/NAD(P)-binding
1508625	1509375	2.75511	1.01346	1508027	1509433	ydcR	E	Amino acid transport and metabolism	fused predicted DNA-binding transcriptional regulator/predicted amino transferase
1543750	1544750	2.74057	1.00817	1544312	1545136	yddG	-	not classify	predicted methyl viologen efflux pump
4370625	4371375	2.7221	1.0014	4369048	4370694	groEL	O	Posttranslational modification, protein turnover, chaperones	chaperonin GroEL
4370625	4371375	2.7221	1.0014	4370832	4371185	yjeI	-	not classify	hypothetical protein
738375	738875	2.71889	1.00023	738224	738733	ybgA	S	Function unknown	hypothetical protein
738375	738875	2.71889	1.00023	738730	740148	phr	L	DNA replication, recombination and repair	deoxyribodipyrimidine photolyase, FAD-binding
2621375	2623125	2.71304	0.99807	2621066	2623132	ppk	-	not classify	polyphosphate kinase
2943625	2944625	2.7068	0.995767	2943058	2943864	ygdL	H	Coenzyme metabolism	hypothetical protein
2943625	2944625	2.7068	0.995767	2944103	2945200	mltA	M	Cell envelope biogenesis, outer membrane	membrane-bound lytic murein transglycosylase A
3454125	3455875	2.70147	0.993795	3453600	3454415	gspC	U	Intracellular trafficking, secretion,and vesicular transport	general secretory pathway component, cryptic
3454125	3455875	2.70147	0.993795	3454399	3456351	gspD	U	Intracellular trafficking, secretion,and vesicular transport	general secretory pathway component, cryptic
2630875	2631375	2.69846	0.99268	2630626	2632092	guaB	R	General function prediction only	inositol-5-monophosphate dehydrogenase
2740875	2741625	2.68675	0.988332	2740405	2741631	yfiN	-	not classify	predicted diguanylate cyclase
1455500	1456250	2.67562	0.984182	1454454	1455524	paaE	C	Energy production and conversion	predicted multicomponent oxygenase/reductase subunit for phenylacetic acid degradation
1455500	1456250	2.67562	0.984182	1455521	1456288	paaF	I	Lipid metabolism	enoyl-CoA hydratase-isomerase
84625	85125	2.66324	0.979543	84368	85312	leuO	K	Transcription	leucine transcriptional activator
2846000	2848250	2.66128	0.978809	2845437	2847263	hycC	P	Inorganic ion transport and metabolism	NADH dehydrogenase subunit N
2846000	2848250	2.66128	0.978809	2847260	2847871	hycB	C	Energy production and conversion	hydrogenase 3, Fe-S subunit
2846000	2848250	2.66128	0.978809	2847996	2848457	hycA	-	not classify	regulator of the transcriptional regulator FhlA
387875	388375	2.65995	0.978306	387977	388951	hemB	-	not classify	delta-aminolevulinic acid dehydratase
1130250	1131250	2.65986	0.978272	1130241	1130657	flgB	N	Cell motility and secretion	flagellar basal-body rod protein B
1130250	1131250	2.65986	0.978272	1130661	1131065	flgC	N	Cell motility and secretion	flagellar basal-body rod protein C
1130250	1131250	2.65986	0.978272	1131077	1131772	flgD	N	Cell motility and secretion	flagellar basal body rod modification protein D
998375	1002375	2.65702	0.977204	997713	998414	ycbR	U	Intracellular trafficking, secretion,and vesicular transport	predicted periplasmic pilin chaperone
998375	1002375	2.65702	0.977204	998439	1001039	ycbS	U	Intracellular trafficking, secretion,and vesicular transport	predicted outer membrane usher protein
998375	1002375	2.65702	0.977204	1001030	1002100	ycbT	-	not classify	predicted fimbrial-like adhesin protein
998375	1002375	2.65702	0.977204	1002112	1002654	ycbU	U	Intracellular trafficking, secretion,and vesicular transport	predicted fimbrial-like adhesin protein
4278125	4279375	2.65443	0.97623	4278003	4279652	yjcE	P	Inorganic ion transport and metabolism	predicted cation/proton antiporter
3740000	3741250	2.64736	0.973565	3739707	3740555	yiaJ	K	Transcription	predicted DNA-binding transcriptional repressor
3740000	3741250	2.64736	0.973565	3740756	3741754	yiaK	-	not classify	2,3-diketo-L-gulonate dehydrogenase, NADH-dependent
3299375	3299875	2.6331	0.968163	3299507	3300502	yhbU	-	not classify	predicted peptidase (collagenase-like)
1590500	1591250	2.6316	0.967591	1590689	1592089	ydeU	U	Intracellular trafficking, secretion,and vesicular transport	conserved protein, predicted pseudogene
1993375	1993875	2.62799	0.966219	1992727	1993383	uvrY	K	Transcription	response regulator
1993375	1993875	2.62799	0.966219	1993842	1994066	yecF	-	not classify	hypothetical protein
724750	726500	2.61224	0.960207	724211	726259	kdpB	P	Inorganic ion transport and metabolism	potassium-transporting ATPase subunit B
724750	726500	2.61224	0.960207	726282	727955	kdpA	-	not classify	potassium-transporting ATPase subunit A
464125	465125	2.60734	0.958329	464076	464771	ybaX	R	General function prediction only	predicted aluminum resistance protein
464125	465125	2.60734	0.958329	464836	466536	ybaE	R	General function prediction only	predicted transporter subunit: periplasmic-binding component of ABC superfamily
661250	662250	2.5855	0.949919	660860	661501	lipB	H	Coenzyme metabolism	lipoyltransferase
661250	662250	2.5855	0.949919	661602	661865	ybeD	-	not classify	hypothetical protein
661250	662250	2.5855	0.949919	661975	663186	dacA	M	Cell envelope biogenesis, outer membrane	D-alanyl-D-alanine carboxypeptidase (penicillin-binding protein 5)
2533250	2535750	2.57371	0.945347	2532088	2533815	ptsI	G	Carbohydrate transport and metabolism	PEP-protein phosphotransferase of PTS system (enzyme I)
2533250	2535750	2.57371	0.945347	2533856	2534365	crr	-	not classify	glucose-specific PTS system enzyme IIA component
2533250	2535750	2.57371	0.945347	2534408	2535259	pdxK	H	Coenzyme metabolism	pyridoxine kinase
2533250	2535750	2.57371	0.945347	2535364	2535738	yfeK	-	not classify	hypothetical protein
3360500	3363250	2.56864	0.943376	3360134	3360808	yhcA	U	Intracellular trafficking, secretion,and vesicular transport	predicted periplasmic chaperone protein
3360500	3363250	2.56864	0.943376	3360829	3363210	yhcD	U	Intracellular trafficking, secretion,and vesicular transport	predicted outer membrane protein
2151875	2153375	2.55694	0.938812	2153287	2156409	mdtB	V	Defense mechanisms	multidrug efflux system, subunit B
4423500	4425500	2.55572	0.938334	4423141	4423536	rpsF	J	Translation, ribosomal structure and biogenesis	30S ribosomal protein S6
4423500	4425500	2.55572	0.938334	4423543	4423857	priB	L	DNA replication, recombination and repair	primosomal replication protein N
4423500	4425500	2.55572	0.938334	4423862	4424089	rpsR	-	not classify	30S ribosomal protein S18
4423500	4425500	2.55572	0.938334	4424131	4424580	rplI	J	Translation, ribosomal structure and biogenesis	50S ribosomal protein L9
4423500	4425500	2.55572	0.938334	4424651	4425445	yjfZ	-	not classify	hypothetical protein
4531500	4532750	2.54449	0.933929	4531262	4531807	yjhQ	R	General function prediction only	KpLE2 phage-like element; predicted acetyltransferase
4531500	4532750	2.54449	0.933929	4531819	4532076	yjhX	S	Function unknown	hypothetical protein
248375	250125	2.53975	0.932066	248358	250070	fhiA	U	Intracellular trafficking, secretion,and vesicular transport	flagellar system protein, promoterless fragment (pseudogene)
111375	112875	2.53405	0.929819	111044	111433	mutT	R	General function prediction only	nucleoside triphosphate pyrophosphohydrolase, marked preference for dGTP
111375	112875	2.53405	0.929819	111649	111846	yacG	-	not classify	zinc-binding protein
111375	112875	2.53405	0.929819	111856	112599	yacF	-	not classify	hypothetical protein
111375	112875	2.53405	0.929819	112599	113219	coaE	H	Coenzyme metabolism	dephospho-CoA kinase
887000	887500	2.52792	0.927397	886646	887182	ybjK	S	Function unknown	predicted DNA-binding transcriptional regulator
887000	887500	2.52792	0.927397	887357	889042	ybjL	R	General function prediction only	hypothetical protein
4304500	4309250	2.52101	0.924661	4302635	4304620	yjcS	Q	Secondary metabolites biosynthesis, transport and catabolism	predicted alkyl sulfatase
4304500	4309250	2.52101	0.924661	4304893	4305822	alsK	G	Carbohydrate transport and metabolism	D-allose kinase
4304500	4309250	2.52101	0.924661	4305806	4306501	alsE	G	Carbohydrate transport and metabolism	allulose-6-phosphate 3-epimerase
4304500	4309250	2.52101	0.924661	4306512	4307492	alsC	G	Carbohydrate transport and metabolism	D-allose transporter subunit
4304500	4309250	2.52101	0.924661	4307471	4309003	alsA	G	Carbohydrate transport and metabolism	fused D-allose transporter subunits of ABC superfamily: ATP-binding components
4304500	4309250	2.52101	0.924661	4309130	4310065	alsB	G	Carbohydrate transport and metabolism	D-allose transporter subunit
1151500	1152250	2.50647	0.918874	1151162	1152403	fabF	Q	Secondary metabolites biosynthesis, transport and catabolism	3-oxoacyl-(acyl carrier protein) synthase
2523250	2523750	2.50169	0.916965	2523149	2523913	yfeN	-	not classify	conserved outer membrane protein
2554375	2557375	2.49481	0.914211	2553763	2554422	eutL	-	not classify	predicted carboxysome structural protein with predicted role in ethanolamine utilization
2554375	2557375	2.49481	0.914211	2554432	2555319	eutC	-	not classify	ethanolamine ammonia-lyase small subunit
2554375	2557375	2.49481	0.914211	2555340	2556701	eutB	-	not classify	ethanolamine ammonia-lyase, large subunit, heavy chain
2554375	2557375	2.49481	0.914211	2556793	2558088	intZ	L	DNA replication, recombination and repair	CPZ-55 prophage; predicted integrase
4460125	4461375	2.47983	0.90819	4458545	4460683	nrdD	F	Nucleotide transport and metabolism	anaerobic ribonucleoside triphosphate reductase
4460125	4461375	2.47983	0.90819	4461077	4462732	treC	-	not classify	trehalose-6-P hydrolase
1761125	1762375	2.47306	0.905454	1760546	1762033	sufB	-	not classify	component of SufBCD complex
1761125	1762375	2.47306	0.905454	1762042	1762410	sufA	S	Function unknown	iron-sulfur cluster assembly scaffold protein
198000	199500	2.46905	0.903834	197928	200360	yaeT	M	Cell envelope biogenesis, outer membrane	hypothetical protein
2750250	2751500	2.46709	0.903041	2749817	2751478	recN	L	DNA replication, recombination and repair	recombination and repair protein
3318250	3319500	2.45306	0.897336	3318010	3319635	yhbX	R	General function prediction only	predicted hydrolase, inner membrane
1385125	1386375	2.45179	0.896818	1384744	1386285	tyrR	E	Amino acid transport and metabolism	DNA-binding transcriptional dual regulator, tyrosine-binding
1385125	1386375	2.45179	0.896818	1386329	1386835	tpx	O	Posttranslational modification, protein turnover, chaperones	thiol peroxidase
2845875	2848375	2.44893	0.895653	2845437	2847263	hycC	P	Inorganic ion transport and metabolism	NADH dehydrogenase subunit N
2845875	2848375	2.44893	0.895653	2847260	2847871	hycB	C	Energy production and conversion	hydrogenase 3, Fe-S subunit
2845875	2848375	2.44893	0.895653	2847996	2848457	hycA	-	not classify	regulator of the transcriptional regulator FhlA
2002250	2003500	2.44862	0.895524	2001896	2003302	fliD	N	Cell motility and secretion	flagellar capping protein
2002250	2003500	2.44862	0.895524	2003327	2003737	fliS	O	Posttranslational modification, protein turnover, chaperones	flagellar protein FliS
1024500	1025500	2.44827	0.895384	1023694	1025748	helD	L	DNA replication, recombination and repair	DNA helicase IV
4015500	4018000	2.43708	0.890801	4015356	4016783	rmuC	S	Function unknown	predicted recombination limiting protein
4015500	4018000	2.43708	0.890801	4016878	4017633	ubiE	H	Coenzyme metabolism	ubiquinone/menaquinone biosynthesis methyltransferase
4015500	4018000	2.43708	0.890801	4017647	4018252	yigP	-	not classify	hypothetical protein
3285750	3286500	2.43583	0.890286	3285448	3286032	yraH	U	Intracellular trafficking, secretion,and vesicular transport	predicted fimbrial-like adhesin protein
3285750	3286500	2.43583	0.890286	3286112	3286807	yraI	U	Intracellular trafficking, secretion,and vesicular transport	predicted periplasmic pilin chaperone
1727250	1727750	2.41971	0.883649	1727111	1731727	lhr	R	General function prediction only	predicted ATP-dependent helicase
3748000	3748750	2.41819	0.88302	3747255	3748115	sgbU	G	Carbohydrate transport and metabolism	predicted L-xylulose 5-phosphate 3-epimerase
3748000	3748750	2.41819	0.88302	3748109	3748804	sgbE	G	Carbohydrate transport and metabolism	L-ribulose-5-phosphate 4-epimerase
2002250	2003750	2.41623	0.882211	2001896	2003302	fliD	N	Cell motility and secretion	flagellar capping protein
2002250	2003750	2.41623	0.882211	2003327	2003737	fliS	O	Posttranslational modification, protein turnover, chaperones	flagellar protein FliS
2002250	2003750	2.41623	0.882211	2003737	2004102	fliT	-	not classify	predicted chaperone
4063500	4065250	2.41456	0.881519	4062386	4063789	yihO	G	Carbohydrate transport and metabolism	predited transporter
4063500	4065250	2.41456	0.881519	4063832	4065238	yihP	G	Carbohydrate transport and metabolism	predicted transporter
2860375	2861375	2.40569	0.877836	2860357	2861523	ygbK	S	Function unknown	hypothetical protein
2629500	2631500	2.39397	0.872952	2628980	2630557	guaA	F	Nucleotide transport and metabolism	bifunctional GMP synthase/glutamine amidotransferase protein
2629500	2631500	2.39397	0.872952	2630626	2632092	guaB	R	General function prediction only	inositol-5-monophosphate dehydrogenase
936750	937250	2.39377	0.872871	936592	937206	lolA	M	Cell envelope biogenesis, outer membrane	outer-membrane lipoprotein carrier protein precursor
936750	937250	2.39377	0.872871	937217	938560	ycaJ	L	DNA replication, recombination and repair	recombination protein
731250	733750	2.37969	0.866972	728806	732999	rhsC	M	Cell envelope biogenesis, outer membrane	rhsC element core protein RshC
731250	733750	2.37969	0.866972	732999	733325	ybfB	-	not classify	predicted inner membrane protein
731250	733750	2.37969	0.866972	733443	734876	ybfO	M	Cell envelope biogenesis, outer membrane	conserved protein, rhs-like
2614000	2616750	2.37754	0.866066	2616097	2616843	hda	L	DNA replication, recombination and repair	DNA replication initiation factor
292250	293000	2.3617	0.85938	292444	293142	yagL	L	DNA replication, recombination and repair	CP4-6 prophage; DNA-binding protein
1834250	1835000	2.3567	0.857264	1834097	1835263	ynjB	R	General function prediction only	hypothetical protein
571500	572250	2.35598	0.856956	572144	572314	ninE	-	not classify	DLP12 prophage; conserved protein
1648125	1648875	2.34159	0.850829	1648102	1649022	ydfE	-	not classify	Qin prophage; predicted protein
1896125	1899875	2.33822	0.84939	1894956	1896320	sdaA	E	Amino acid transport and metabolism	L-serine deaminase I
1896125	1899875	2.33822	0.84939	1896451	1898049	yoaD	-	not classify	predicted phosphodiesterase
1896125	1899875	2.33822	0.84939	1898053	1899609	yoaE	R	General function prediction only	fused predicted membrane protein/conserved protein
998375	1000375	2.33743	0.849052	997713	998414	ycbR	U	Intracellular trafficking, secretion,and vesicular transport	predicted periplasmic pilin chaperone
998375	1000375	2.33743	0.849052	998439	1001039	ycbS	U	Intracellular trafficking, secretion,and vesicular transport	predicted outer membrane usher protein
111250	113000	2.33487	0.847958	111044	111433	mutT	R	General function prediction only	nucleoside triphosphate pyrophosphohydrolase, marked preference for dGTP
111250	113000	2.33487	0.847958	111649	111846	yacG	-	not classify	zinc-binding protein
111250	113000	2.33487	0.847958	111856	112599	yacF	-	not classify	hypothetical protein
111250	113000	2.33487	0.847958	112599	113219	coaE	H	Coenzyme metabolism	dephospho-CoA kinase
4489375	4491125	2.33199	0.846721	4489229	4490548	idnT	E	Amino acid transport and metabolism	L-idonate and D-gluconate transporter
4489375	4491125	2.33199	0.846721	4490610	4491374	idnO	R	General function prediction only	gluconate 5-dehydrogenase
1098375	1100375	2.33088	0.846247	1098102	1098839	ycdX	R	General function prediction only	hypothetical protein
1098375	1100375	2.33088	0.846247	1098863	1099417	ycdY	R	General function prediction only	hypothetical protein
1098375	1100375	2.33088	0.846247	1099519	1100010	ycdZ	-	not classify	predicted inner membrane protein
1098375	1100375	2.33088	0.846247	1100074	1100907	csgG	M	Cell envelope biogenesis, outer membrane	outer membrane lipoprotein
464125	465375	2.33081	0.846215	464076	464771	ybaX	R	General function prediction only	predicted aluminum resistance protein
464125	465375	2.33081	0.846215	464836	466536	ybaE	R	General function prediction only	predicted transporter subunit: periplasmic-binding component of ABC superfamily
2740750	2741750	2.31406	0.839003	2740405	2741631	yfiN	-	not classify	predicted diguanylate cyclase
2740750	2741750	2.31406	0.839003	2741647	2742129	yfiB	M	Cell envelope biogenesis, outer membrane	predicted outer membrane lipoprotein
204750	206500	2.30521	0.835172	204493	205089	rnhB	L	DNA replication, recombination and repair	ribonuclease HII
204750	206500	2.30521	0.835172	205126	208608	dnaE	L	DNA replication, recombination and repair	DNA polymerase III subunit alpha
1267125	1269125	2.30393	0.834618	1266543	1267352	ychA	S	Function unknown	predicted transcriptional regulator
1267125	1269125	2.30393	0.834618	1267388	1268242	kdsA	M	Cell envelope biogenesis, outer membrane	2-dehydro-3-deoxyphosphooctonate aldolase
1267125	1269125	2.30393	0.834618	1268391	1268498	ldrA	-	not classify	toxic polypeptide, small
1267125	1269125	2.30393	0.834618	1268926	1269033	ldrB	-	not classify	toxic polypeptide, small
4534625	4535875	2.30182	0.8337	4535682	4536788	yjhT	S	Function unknown	hypothetical protein
1539250	1540250	2.29826	0.832151	1536874	1540614	narZ	C	Energy production and conversion	nitrate reductase 2 (NRZ), alpha subunit
2193750	2194250	2.29782	0.831962	2192322	2194355	metG	R	General function prediction only	methionyl-tRNA synthetase
1656125	1659625	2.29066	0.828842	1656093	1658519	ynfE	C	Energy production and conversion	oxidoreductase subunit
1656125	1659625	2.29066	0.828842	1658580	1661003	ynfF	C	Energy production and conversion	oxidoreductase subunit
3078250	3079750	2.28478	0.826271	3077666	3079657	tktA	G	Carbohydrate transport and metabolism	transketolase 1, thiamin-binding
84625	85375	2.27702	0.822868	84368	85312	leuO	K	Transcription	leucine transcriptional activator
1455625	1456125	2.27577	0.822316	1455521	1456288	paaF	I	Lipid metabolism	enoyl-CoA hydratase-isomerase
656625	657375	2.27562	0.822253	656515	656724	cspE	-	not classify	cold shock protein E
656625	657375	2.27562	0.822253	656778	657161	ccrB	D	Cell division and chromosome partitioning	camphor resistance protein CrcB
2121750	2125500	2.27114	0.820284	2121108	2122544	cpsB	G	Carbohydrate transport and metabolism	mannose-1-phosphate guanyltransferase
2121750	2125500	2.27114	0.820284	2122547	2123770	wcaI	M	Cell envelope biogenesis, outer membrane	predicted glycosyl transferase
2121750	2125500	2.27114	0.820284	2123767	2124246	nudD	R	General function prediction only	GDP-mannose mannosyl hydrolase
2121750	2125500	2.27114	0.820284	2124249	2125214	fcl	G	Carbohydrate transport and metabolism	bifunctional GDP-fucose synthetase: GDP-4-dehydro-6-deoxy-D-mannose epimerase/ GDP-4-dehydro-6-L-deoxygalactose reductase
2121750	2125500	2.27114	0.820284	2125217	2126338	gmd	M	Cell envelope biogenesis, outer membrane	GDP-D-mannose dehydratase, NAD(P)-binding
173375	174125	2.26129	0.815937	171462	173444	fhuB	P	Inorganic ion transport and metabolism	fused iron-hydroxamate transporter subunits of ABC superfamily: membrane components
173375	174125	2.26129	0.815937	173602	174882	hemL	H	Coenzyme metabolism	glutamate-1-semialdehyde aminotransferase
2775375	2775875	2.26113	0.815865	2775137	2775454	yfjZ	-	not classify	CP4-57 prophage; antitoxin of the YpjF-YfjZ toxin-antitoxin system
2775375	2775875	2.26113	0.815865	2775475	2775804	ypjF	-	not classify	CP4-57 prophage; toxin of the YpjF-YfjZ toxin-antitoxin system
3679750	3680250	2.25412	0.812761	3678467	3679963	yhjJ	R	General function prediction only	predicted zinc-dependent peptidase
3679750	3680250	2.25412	0.812761	3680184	3681470	dctA	C	Energy production and conversion	C4-dicarboxylate transport protein
798875	799375	2.25032	0.811073	798845	799861	ybhD	K	Transcription	predicted DNA-binding transcriptional regulator
3730125	3730625	2.2418	0.807278	3729154	3730146	xylF	G	Carbohydrate transport and metabolism	D-xylose transporter subunit
3730125	3730625	2.2418	0.807278	3730224	3731765	xylG	G	Carbohydrate transport and metabolism	fused D-xylose transporter subunits of ABC superfamily: ATP-binding components
2263375	2263875	2.24037	0.806639	2263472	2264044	yeiP	J	Translation, ribosomal structure and biogenesis	elongation factor P
642750	644000	2.23842	0.805771	643420	644226	rna	J	Translation, ribosomal structure and biogenesis	ribonuclease I
4486000	4486750	2.23598	0.80468	4485341	4486423	yjgQ	-	not classify	conserved inner membrane protein
4486000	4486750	2.23598	0.80468	4486584	4488086	yjgR	R	General function prediction only	predicted ATPase
4314250	4315250	2.2211	0.798001	4314105	4315241	phnM	P	Inorganic ion transport and metabolism	carbon-phosphorus lyase complex subunit
4314250	4315250	2.2211	0.798001	4315238	4315918	phnL	P	Inorganic ion transport and metabolism	carbon-phosphorus lyase complex subunit
2078125	2079625	2.22086	0.797892	2077557	2078615	yeeA	S	Function unknown	conserved inner membrane protein
2078125	2079625	2.22086	0.797892	2078813	2079286	sbmC	L	DNA replication, recombination and repair	DNA gyrase inhibitor
2078125	2079625	2.22086	0.797892	2079405	2080571	dacD	M	Cell envelope biogenesis, outer membrane	D-alanyl-D-alanine carboxypeptidase (penicillin-binding protein 6b)
208250	209250	2.21702	0.796163	205126	208608	dnaE	L	DNA replication, recombination and repair	DNA polymerase III subunit alpha
208250	209250	2.21702	0.796163	208621	209580	accA	I	Lipid metabolism	acetyl-CoA carboxylase subunit alpha
2611250	2612000	2.20927	0.792663	2609922	2611934	hyfR	T	Signal transduction mechanism	DNA-binding transcriptional activator, formate sensing
2611250	2612000	2.20927	0.792663	2611956	2612804	focB	P	Inorganic ion transport and metabolism	predicted formate transporter
2833500	2834500	2.19743	0.787288	2833195	2835447	hypF	O	Posttranslational modification, protein turnover, chaperones	carbamoyl phosphate phosphatase and maturation protein for [NiFe] hydrogenases
1264750	1265250	2.1932	0.785363	1264235	1265317	prfA	J	Translation, ribosomal structure and biogenesis	peptide chain release factor 1
114500	115250	2.18714	0.782594	114522	115724	hofC	U	Intracellular trafficking, secretion,and vesicular transport	assembly protein in type IV pilin biogenesis, transmembrane protein
4214875	4215875	2.18163	0.780072	4213501	4215102	aceB	C	Energy production and conversion	malate synthase
4214875	4215875	2.18163	0.780072	4215132	4216436	aceA	C	Energy production and conversion	isocitrate lyase
1412750	1413250	2.18068	0.779639	1412008	1412817	recT	-	not classify	Rac prophage; recombination and repair protein
1412750	1413250	2.18068	0.779639	1412810	1415410	recE	-	not classify	Rac prophage; exonuclease VIII, 5' -> 3' specific dsDNA exonuclease
3235625	3236625	2.15318	0.766946	3235315	3236319	ygjR	R	General function prediction only	predicted NAD(P)-binding dehydrogenase
3235625	3236625	2.15318	0.766946	3236602	3237567	alx	P	Inorganic ion transport and metabolism	predicted inner membrane protein, part of terminus
2370375	2370875	2.15168	0.766248	2368930	2370582	arnT	M	Cell envelope biogenesis, outer membrane	4-amino-4-deoxy-L-arabinose transferase
2370375	2370875	2.15168	0.766248	2370579	2370914	yfbW	-	not classify	hypothetical protein
3454000	3456000	2.14899	0.764997	3453600	3454415	gspC	U	Intracellular trafficking, secretion,and vesicular transport	general secretory pathway component, cryptic
3454000	3456000	2.14899	0.764997	3454399	3456351	gspD	U	Intracellular trafficking, secretion,and vesicular transport	general secretory pathway component, cryptic
3768500	3769250	2.13804	0.759889	3768266	3769402	yibH	V	Defense mechanisms	hypothetical protein
533750	535750	2.13763	0.759696	533140	534921	gcl	R	General function prediction only	glyoxylate carboligase
533750	535750	2.13763	0.759696	534934	535710	hyi	G	Carbohydrate transport and metabolism	hydroxypyruvate isomerase
3420250	3420750	2.13613	0.758993	3419347	3420450	yhdY	E	Amino acid transport and metabolism	predicted amino-acid transporter subunit
3420250	3420750	2.13613	0.758993	3420458	3421216	yhdZ	E	Amino acid transport and metabolism	predicted amino-acid transporter subunit
3232250	3234000	2.13399	0.757992	3232163	3232477	ygjN	S	Function unknown	hypothetical protein
3232250	3234000	2.13399	0.757992	3232761	3233897	ygjO	J	Translation, ribosomal structure and biogenesis	predicted methyltransferase small domain
3232250	3234000	2.13399	0.757992	3233982	3234485	ygjP	R	General function prediction only	predicted metal dependent hydrolase
4101750	4103000	2.13231	0.757204	4101625	4102998	cpxA	T	Signal transduction mechanism	two-component sensor protein
4101750	4103000	2.13231	0.757204	4102995	4103693	cpxR	K	Transcription	DNA-binding response regulator in two-component regulatory system with CpxA
2240375	2241375	2.13158	0.756863	2239832	2240989	yeiB	S	Function unknown	conserved inner membrane protein
2240375	2241375	2.13158	0.756863	2241006	2241674	folE	H	Coenzyme metabolism	GTP cyclohydrolase I
3730000	3730750	2.12628	0.754373	3729154	3730146	xylF	G	Carbohydrate transport and metabolism	D-xylose transporter subunit
3730000	3730750	2.12628	0.754373	3730224	3731765	xylG	G	Carbohydrate transport and metabolism	fused D-xylose transporter subunits of ABC superfamily: ATP-binding components
4053500	4054000	2.12425	0.75342	4053313	4054362	glnL	T	Signal transduction mechanism	sensory histidine kinase in two-component regulatory system with GlnG
1481250	1483000	2.1181	0.750519	1481142	1484987	hrpA	L	DNA replication, recombination and repair	ATP-dependent helicase
2402000	2402500	2.11553	0.749305	2401973	2402635	nuoB	C	Energy production and conversion	NADH dehydrogenase subunit B
2145250	2149500	2.11293	0.748076	2144716	2145564	alkA	L	DNA replication, recombination and repair	3-methyl-adenine DNA glycosylase II
2145250	2149500	2.11293	0.748076	2145698	2147050	yegD	O	Posttranslational modification, protein turnover, chaperones	predicted chaperone
2145250	2149500	2.11293	0.748076	2147063	2149009	yegI	R	General function prediction only	hypothetical protein
2145250	2149500	2.11293	0.748076	2149209	2149670	yegJ	S	Function unknown	hypothetical protein
111500	112500	2.11251	0.747876	111856	112599	yacF	-	not classify	hypothetical protein
244750	245500	2.09841	0.741178	244327	245094	yafJ	R	General function prediction only	predicted amidotransfease
244750	245500	2.09841	0.741178	245065	245805	yafK	S	Function unknown	hypothetical protein
785125	786375	2.09783	0.740905	784856	785908	aroG	E	Amino acid transport and metabolism	3-deoxy-D-arabino-heptulosonate-7-phosphate synthase, phenylalanine repressible
785125	786375	2.09783	0.740905	786066	786818	gpmA	G	Carbohydrate transport and metabolism	phosphoglyceromutase
3958250	3959750	2.08786	0.736138	3958035	3958310	yifO	S	Function unknown	hypothetical protein
3958250	3959750	2.08786	0.736138	3958265	3958483	yifN	S	Function unknown	conserved protein (pseudogene)
3958250	3959750	2.08786	0.736138	3958700	3960721	rep	L	DNA replication, recombination and repair	DNA helicase and single-stranded DNA-dependent ATPase
4043250	4044250	2.08666	0.735565	4042222	4043652	yihF	S	Function unknown	hypothetical protein
4043250	4044250	2.08666	0.735565	4043693	4044625	yihG	I	Lipid metabolism	predicted endonuclease
3460750	3461250	2.08483	0.734687	3460366	3460953	gspJ	U	Intracellular trafficking, secretion,and vesicular transport	predicted general secretory pathway component, cryptic
3460750	3461250	2.08483	0.734687	3460946	3461929	gspK	U	Intracellular trafficking, secretion,and vesicular transport	general secretory pathway component, cryptic
1362375	1365125	2.08302	0.733818	1362256	1363536	puuB	E	Amino acid transport and metabolism	gamma-Glu-putrescine oxidase, FAD/NAD(P)-binding
1362375	1365125	2.08302	0.733818	1363574	1364839	puuE	E	Amino acid transport and metabolism	GABA aminotransferase, PLP-dependent
1362375	1365125	2.08302	0.733818	1364959	1365936	pspF	T	Signal transduction mechanism	DNA-binding transcriptional activator
2581750	2583000	2.08131	0.732995	2581568	2583547	aegA	C	Energy production and conversion	fused predicted oxidoreductase: FeS binding subunit/NAD/FAD-binding subunit
2209375	2211625	2.08062	0.732665	2209247	2209708	yehR	-	not classify	hypothetical protein
2209375	2211625	2.08062	0.732665	2209748	2210218	yehS	-	not classify	hypothetical protein
2209375	2211625	2.08062	0.732665	2210265	2210984	yehT	T	Signal transduction mechanism	predicted response regulator in two-component system withYehU
2209375	2211625	2.08062	0.732665	2210981	2212666	yehU	T	Signal transduction mechanism	predicted sensory kinase in two-component system with YehT
2750250	2752000	2.07399	0.729473	2749817	2751478	recN	L	DNA replication, recombination and repair	recombination and repair protein
2750250	2752000	2.07399	0.729473	2751627	2751968	smpA	J	Translation, ribosomal structure and biogenesis	small membrane lipoprotein
948500	949250	2.07195	0.728492	947883	948791	ycaN	K	Transcription	predicted DNA-binding transcriptional regulator
948500	949250	2.07195	0.728492	948891	949481	ycaK	R	General function prediction only	hypothetical protein
687625	689125	2.06825	0.726704	687220	688236	insH-3	L	DNA replication, recombination and repair	IS5 transposase and trans-activator
687625	689125	2.06825	0.726704	688566	690104	lnt	M	Cell envelope biogenesis, outer membrane	apolipoprotein N-acyltransferase
1158500	1159500	2.06762	0.726399	1157092	1158525	ptsG	G	Carbohydrate transport and metabolism	fused glucose-specific PTS enzymes: IIB component/IIC component
1158500	1159500	2.06762	0.726399	1158585	1160774	fhuE	P	Inorganic ion transport and metabolism	ferric-rhodotorulic acid outer membrane transporter
1965500	1968000	2.06419	0.724736	1965476	1966525	cheB	T	Signal transduction mechanism	chemotaxis-specific methylesterase
1965500	1968000	2.06419	0.724736	1966528	1967388	cheR	T	Signal transduction mechanism	chemotaxis regulator, protein-glutamate methyltransferase
1965500	1968000	2.06419	0.724736	1967407	1969008	tap	T	Signal transduction mechanism	methyl-accepting protein IV
1187750	1189500	2.06349	0.724398	1187539	1188999	phoQ	T	Signal transduction mechanism	sensory histidine kinase in two-compoent regulatory system with PhoP
1187750	1189500	2.06349	0.724398	1188999	1189670	phoP	K	Transcription	DNA-binding response regulator in two-component regulatory system with PhoQ
1221375	1222125	2.06344	0.724375	1221867	1222142	ymgG	-	not classify	hypothetical protein
1857500	1858750	2.0629	0.724112	1856874	1858253	ydjK	-	not classify	predicted transporter
1857500	1858750	2.0629	0.724112	1858280	1859356	ydjL	R	General function prediction only	predicted oxidoreductase, Zn-dependent and NAD(P)-binding
738250	740000	2.06189	0.723624	738224	738733	ybgA	S	Function unknown	hypothetical protein
738250	740000	2.06189	0.723624	738730	740148	phr	L	DNA replication, recombination and repair	deoxyribodipyrimidine photolyase, FAD-binding
2757750	2759000	2.05679	0.721149	2757007	2758416	yfjI	-	not classify	CP4-57 prophage; predicted protein
2757750	2759000	2.05679	0.721149	2758569	2759195	yfjJ	-	not classify	CP4-57 prophage; predicted protein
1454500	1458500	2.04232	0.714084	1454454	1455524	paaE	C	Energy production and conversion	predicted multicomponent oxygenase/reductase subunit for phenylacetic acid degradation
1454500	1458500	2.04232	0.714084	1455521	1456288	paaF	I	Lipid metabolism	enoyl-CoA hydratase-isomerase
1454500	1458500	2.04232	0.714084	1456288	1457076	paaG	I	Lipid metabolism	enoyl-CoA hydratase
1454500	1458500	2.04232	0.714084	1457078	1458505	paaH	I	Lipid metabolism	3-hydroxybutyryl-CoA dehydrogenase
1454500	1458500	2.04232	0.714084	1458495	1458917	paaI	Q	Secondary metabolites biosynthesis, transport and catabolism	predicted thioesterase
3307375	3308875	2.03928	0.712595	3307055	3309259	pnp	J	Translation, ribosomal structure and biogenesis	polynucleotide phosphorylase/polyadenylase
998500	1000250	2.03913	0.712522	998439	1001039	ycbS	U	Intracellular trafficking, secretion,and vesicular transport	predicted outer membrane usher protein
3062125	3062875	2.03819	0.712062	3062015	3062800	ygfG	I	Lipid metabolism	methylmalonyl-CoA decarboxylase, biotin-independent
3062125	3062875	2.03819	0.712062	3062824	3064302	ygfH	C	Energy production and conversion	propionyl-CoA:succinate-CoA transferase
1162000	1163000	2.03664	0.711302	1161861	1162502	ycfM	R	General function prediction only	predicted outer membrane lipoprotein
1162000	1163000	2.03664	0.711302	1162483	1163307	ycfN	M	Cell envelope biogenesis, outer membrane	thiamin kinase
2338375	2339375	2.03629	0.711128	2338439	2342191	yfaL	U	Intracellular trafficking, secretion,and vesicular transport	adhesin
4304875	4305375	2.03529	0.710636	4304893	4305822	alsK	G	Carbohydrate transport and metabolism	D-allose kinase
970000	971000	2.03162	0.708834	969896	970078	ycaR	-	not classify	hypothetical protein
970000	971000	2.03162	0.708834	970075	970821	kdsB	M	Cell envelope biogenesis, outer membrane	3-deoxy-manno-octulosonate cytidylyltransferase
970000	971000	2.03162	0.708834	970975	971868	ycbJ	-	not classify	hypothetical protein
1048375	1050125	2.02206	0.704115	1047911	1048555	ymcC	-	not classify	predicted outer membrane lipoprotein
1048375	1050125	2.02206	0.704115	1048662	1048967	ymcD	-	not classify	hypothetical protein
1048375	1050125	2.02206	0.704115	1049056	1049331	insA-4	L	DNA replication, recombination and repair	IS1 repressor protein InsA
1048375	1050125	2.02206	0.704115	1049250	1049753	insB-4	L	DNA replication, recombination and repair	IS1 transposase InsAB'
4173000	4175250	2.02019	0.703191	4172099	4173049	coaA	H	Coenzyme metabolism	pantothenate kinase
4173000	4175250	2.02019	0.703191	4173967	4175151	tufB	J	Translation, ribosomal structure and biogenesis	protein chain elongation factor EF-Tu (duplicate of tufA)
651625	653625	2.01842	0.702317	651458	653116	citA	T	Signal transduction mechanism	sensory histidine kinase in two-component regulatory system with citB
651625	653625	2.01842	0.702317	653085	653765	citB	T	Signal transduction mechanism	DNA-binding response regulator in two-component regulatory system with citA
884000	885000	2.01727	0.701743	882896	884128	cmr	-	not classify	multidrug efflux system protein
884000	885000	2.01727	0.701743	884169	884453	ybjH	-	not classify	hypothetical protein
884000	885000	2.01727	0.701743	884539	885354	ybjI	R	General function prediction only	hypothetical protein
3409750	3410750	2.01631	0.701271	3409675	3410559	yhdJ	L	DNA replication, recombination and repair	predicted methyltransferase
3409750	3410750	2.01631	0.701271	3410643	3410822	yhdU	-	not classify	predicted membrane protein
2464750	2466000	2.01075	0.698509	2464567	2465724	intS	L	DNA replication, recombination and repair	CPS-53 (KpLE1) prophage; predicted prophage CPS-53 integrase
2464750	2466000	2.01075	0.698509	2465877	2466239	yfdG	-	not classify	CPS-53 (KpLE1) prophage; bactoprenol-linked glucose translocase (flippase)
1082125	1082625	2.00847	0.697374	1081466	1082593	ycdO	P	Inorganic ion transport and metabolism	hypothetical protein
1082125	1082625	2.00847	0.697374	1082599	1083870	ycdB	P	Inorganic ion transport and metabolism	hypothetical protein
564000	564500	2.00545	0.69587	564038	565201	intD	L	DNA replication, recombination and repair	DLP12 prophage; predicted integrase
304875	306625	2.00303	0.694662	304398	306041	yagW	-	not classify	predicted receptor
304875	306625	2.00303	0.694662	306031	308556	yagX	-	not classify	predicted aromatic compound dioxygenase
1726750	1727750	2.00039	0.69334	1726371	1727018	rnt	L	DNA replication, recombination and repair	ribonuclease T
1726750	1727750	2.00039	0.69334	1727111	1731727	lhr	R	General function prediction only	predicted ATP-dependent helicase
3246500	3248500	1.99383	0.690056	3246461	3246844	yqjB	-	not classify	hypothetical protein
3246500	3248500	1.99383	0.690056	3246991	3247359	yqjC	-	not classify	hypothetical protein
3246500	3248500	1.99383	0.690056	3247397	3247702	yqjD	S	Function unknown	hypothetical protein
3246500	3248500	1.99383	0.690056	3247705	3248109	yqjE	-	not classify	conserved inner membrane protein
3246500	3248500	1.99383	0.690056	3248099	3248398	yqjK	-	not classify	hypothetical protein
2239250	2239750	1.98453	0.685385	2238650	2239690	galS	K	Transcription	DNA-binding transcriptional repressor
3090750	3092250	1.98261	0.684417	3089900	3090850	gshB	J	Translation, ribosomal structure and biogenesis	glutathione synthetase
3090750	3092250	1.98261	0.684417	3090959	3091522	yqgE	K	Transcription	hypothetical protein
3090750	3092250	1.98261	0.684417	3091522	3091938	yqgF	-	not classify	Holliday junction resolvase-like protein
3090750	3092250	1.98261	0.684417	3092122	3093102	yggR	U	Intracellular trafficking, secretion,and vesicular transport	predicted transporter
4126625	4127625	1.97368	0.679901	4126695	4127855	metB	E	Amino acid transport and metabolism	cystathionine gamma-synthase
2859125	2859625	1.97168	0.678884	2858489	2859286	ygbI	G	Carbohydrate transport and metabolism	predicted DNA-binding transcriptional regulator
2859125	2859625	1.97168	0.678884	2859452	2860360	ygbJ	I	Lipid metabolism	predicted dehydrogenase, with NAD(P)-binding Rossmann-fold domain
3090750	3093000	1.96825	0.677143	3089900	3090850	gshB	J	Translation, ribosomal structure and biogenesis	glutathione synthetase
3090750	3093000	1.96825	0.677143	3090959	3091522	yqgE	K	Transcription	hypothetical protein
3090750	3093000	1.96825	0.677143	3091522	3091938	yqgF	-	not classify	Holliday junction resolvase-like protein
3090750	3093000	1.96825	0.677143	3092122	3093102	yggR	U	Intracellular trafficking, secretion,and vesicular transport	predicted transporter
911000	911750	1.96701	0.676514	910405	911373	hcr	C	Energy production and conversion	HCP oxidoreductase, NADH-dependent
911000	911750	1.96701	0.676514	911385	913037	hcp	-	not classify	hydroxylamine reductase
2895125	2897125	1.96353	0.674742	2894555	2895892	ygcS	-	not classify	predicted transporter
2895125	2897125	1.96353	0.674742	2895986	2897440	ygcU	C	Energy production and conversion	predicted FAD containing dehydrogenase
417625	418375	1.96329	0.67462	417113	418408	phoR	T	Signal transduction mechanism	sensory histidine kinase in two-component regulatory system with PhoB
3310125	3310625	1.96259	0.674264	3309855	3310799	truB	J	Translation, ribosomal structure and biogenesis	tRNA pseudouridine synthase B
3418375	3421875	1.95746	0.671646	3418156	3419337	yhdX	E	Amino acid transport and metabolism	predicted amino-acid transporter subunit
3418375	3421875	1.95746	0.671646	3419347	3420450	yhdY	E	Amino acid transport and metabolism	predicted amino-acid transporter subunit
3418375	3421875	1.95746	0.671646	3420458	3421216	yhdZ	E	Amino acid transport and metabolism	predicted amino-acid transporter subunit
4480750	4481250	1.95518	0.670484	4479005	4481860	valS	J	Translation, ribosomal structure and biogenesis	valyl-tRNA synthetase
2471000	2471500	1.95095	0.668317	2470900	2471268	yfdO	-	not classify	CPS-53 (KpLE1) prophage; predicted defective phage replication protein O
886750	887500	1.94951	0.667579	886646	887182	ybjK	S	Function unknown	predicted DNA-binding transcriptional regulator
886750	887500	1.94951	0.667579	887357	889042	ybjL	R	General function prediction only	hypothetical protein
776500	777000	1.94745	0.666523	775565	776830	tolA	M	Cell envelope biogenesis, outer membrane	cell envelope integrity inner membrane protein TolA
776500	777000	1.94745	0.666523	776963	778255	tolB	U	Intracellular trafficking, secretion,and vesicular transport	translocation protein TolB precursor
2163375	2164375	1.94232	0.663884	2163213	2163545	yegP	-	not classify	hypothetical protein
2163375	2164375	1.94232	0.663884	2163692	2165053	yegQ	-	not classify	predicted peptidase
4460000	4461500	1.93651	0.660888	4458545	4460683	nrdD	F	Nucleotide transport and metabolism	anaerobic ribonucleoside triphosphate reductase
4460000	4461500	1.93651	0.660888	4461077	4462732	treC	-	not classify	trehalose-6-P hydrolase
2448875	2449375	1.93432	0.659754	2448609	2449097	yfcQ	-	not classify	predicted fimbrial-like adhesin protein
2448875	2449375	1.93432	0.659754	2449094	2449606	yfcR	-	not classify	predicted fimbrial-like adhesin protein
3459125	3459625	1.93235	0.658738	3459045	3459482	gspG	U	Intracellular trafficking, secretion,and vesicular transport	pseudopilin, cryptic, general secretion pathway
3459125	3459625	1.93235	0.658738	3459490	3459999	gspH	-	not classify	predicted general secretory pathway component, cryptic
2091875	2092875	1.93066	0.657862	2091492	2092559	hisB	E	Amino acid transport and metabolism	imidazole glycerol-phosphate dehydratase/histidinol phosphatase
2091875	2092875	1.93066	0.657862	2092559	2093149	hisH	E	Amino acid transport and metabolism	imidazole glycerol phosphate synthase subunit HisH
3590500	3592250	1.9299	0.657466	3592226	3593503	livM	E	Amino acid transport and metabolism	leucine/isoleucine/valine transporter subunit
2175375	2176125	1.92778	0.656369	2175534	2176586	fbaB	G	Carbohydrate transport and metabolism	fructose-bisphosphate aldolase
1643375	1644125	1.92127	0.652986	1643370	1643657	relE	D	Cell division and chromosome partitioning	Qin prophage; toxin of the RelE-RelB toxin-antitoxin system
1643375	1644125	1.92127	0.652986	1643657	1643896	relB	L	DNA replication, recombination and repair	Qin prophage; bifunctional antitoxin of the RelE-RelB toxin-antitoxin system/ transcriptional repressor
1643375	1644125	1.92127	0.652986	1643921	1644226	ydfV	-	not classify	Qin prophage; predicted protein
260000	260500	1.9209	0.652796	259612	260715	proB	E	Amino acid transport and metabolism	gamma-glutamyl kinase
896500	897000	1.91983	0.652235	896307	897152	potI	E	Amino acid transport and metabolism	putrescine transporter subunit: membrane component of ABC superfamily
4330500	4332000	1.91657	0.650539	4330204	4331295	basS	T	Signal transduction mechanism	sensory histidine kinase in two-component regulatory system with BasR
4330500	4332000	1.91657	0.650539	4331305	4331973	basR	K	Transcription	DNA-binding response regulator in two-component regulatory system with BasS
4330500	4332000	1.91657	0.650539	4331970	4333613	eptA	R	General function prediction only	predicted metal dependent hydrolase
4631250	4631750	1.91388	0.649135	4631256	4631768	yjjX	-	not classify	NTPase
274375	275125	1.91171	0.647997	274549	275952	mmuP	E	Amino acid transport and metabolism	CP4-6 prophage; predicted S-methylmethionine transporter
1419625	1420875	1.90987	0.647037	1419143	1420000	ydaU	S	Function unknown	Rac prophage; conserved protein
1419625	1420875	1.90987	0.647037	1420007	1420753	ydaV	L	DNA replication, recombination and repair	Rac prophage; predicted DNA replication protein
1419625	1420875	1.90987	0.647037	1420776	1421336	ydaW	-	not classify	Rac prophage; predicted DNA-binding protein
1170250	1172000	1.90278	0.643313	1169741	1173187	mfd	K	Transcription	transcription-repair coupling factor
2585500	2586000	1.89866	0.641147	2585617	2588730	acrD	V	Defense mechanisms	aminoglycoside/multidrug efflux system
3925125	3925875	1.89444	0.638925	3925178	3926170	asnA	E	Amino acid transport and metabolism	asparagine synthetase AsnA
260000	261000	1.89422	0.638809	259612	260715	proB	E	Amino acid transport and metabolism	gamma-glutamyl kinase
260000	261000	1.89422	0.638809	260727	261980	proA	E	Amino acid transport and metabolism	gamma-glutamyl phosphate reductase
1041875	1044375	1.89386	0.638618	1041253	1043433	yccC	M	Cell envelope biogenesis, outer membrane	cryptic autophosphorylating protein tyrosine kinase Etk
1041875	1044375	1.89386	0.638618	1043453	1043899	etp	T	Signal transduction mechanism	phosphotyrosine-protein phosphatase
1041875	1044375	1.89386	0.638618	1043887	1045026	yccZ	-	not classify	predicted exopolysaccharide export protein
2814625	2815625	1.88143	0.632035	2814534	2814962	yqaA	S	Function unknown	conserved inner membrane protein
2814625	2815625	1.88143	0.632035	2814959	2815525	yqaB	R	General function prediction only	predicted hydrolase
1521625	1522375	1.87527	0.628754	1521331	1522392	yncE	S	Function unknown	hypothetical protein
128000	129250	1.87477	0.628485	127912	129336	lpdA	C	Energy production and conversion	dihydrolipoamide dehydrogenase
3779750	3780500	1.86396	0.622705	3779764	3780585	cysE	E	Amino acid transport and metabolism	serine acetyltransferase
3836000	3837250	1.85539	0.618097	3834976	3836160	setC	-	not classify	predicted sugar efflux system
3836000	3837250	1.85539	0.618097	3836271	3837194	yicL	-	not classify	predicted inner membrane protein
3836000	3837250	1.85539	0.618097	3837198	3838016	nlpA	P	Inorganic ion transport and metabolism	cytoplasmic membrane lipoprotein-28
111000	113500	1.85379	0.61723	113444	114487	guaC	F	Nucleotide transport and metabolism	guanosine 5'-monophosphate oxidoreductase
1304000	1304500	1.84951	0.614921	1303788	1304792	oppF	E	Amino acid transport and metabolism	oligopeptide transporter subunit
82500	83500	1.84735	0.613753	81958	83529	leuA	E	Amino acid transport and metabolism	2-isopropylmalate synthase
2949750	2950500	1.84574	0.612883	2948657	2950483	recD	L	DNA replication, recombination and repair	exonuclease V (RecBCD complex), alpha chain
2949750	2950500	1.84574	0.612883	2950483	2954025	recB	L	DNA replication, recombination and repair	exonuclease V (RecBCD complex), beta subunit
1247500	1249000	1.84532	0.612654	1246919	1248337	dhaH	S	Function unknown	fused predicted dihydroxyacetone-specific PTS enzymes: HPr component/EI component
1247500	1249000	1.84532	0.612654	1248348	1248980	dhaL	G	Carbohydrate transport and metabolism	dihydroxyacetone kinase, C-terminal domain
1247500	1249000	1.84532	0.612654	1248991	1250061	dhaK	G	Carbohydrate transport and metabolism	dihydroxyacetone kinase, N-terminal domain
3127625	3129375	1.84411	0.611997	3127065	3128237	yghO	-	not classify	predicted DNA-binding transcriptional regulator
3127625	3129375	1.84411	0.611997	3128200	3129216	insH-9	L	DNA replication, recombination and repair	IS5 transposase and trans-activator
3127625	3129375	1.84411	0.611997	3129363	3130430	yghQ	R	General function prediction only	predicted inner membrane protein
1887750	1888250	1.84279	0.611282	1886085	1887770	fadD	Q	Secondary metabolites biosynthesis, transport and catabolism	acyl-CoA synthase
1887750	1888250	1.84279	0.611282	1887975	1888556	yeaY	-	not classify	predicted lipoprotein
4484000	4484750	1.84203	0.610867	4484241	4485341	yjgP	-	not classify	conserved inner membrane protein
4543875	4545625	1.83816	0.608764	4543119	4545755	fimD	U	Intracellular trafficking, secretion,and vesicular transport	outer membrane usher protein, type 1 fimbrial synthesis
2448125	2453625	1.83399	0.606496	2448073	2448612	yfcP	U	Intracellular trafficking, secretion,and vesicular transport	predicted fimbrial-like adhesin protein
2448125	2453625	1.83399	0.606496	2448609	2449097	yfcQ	-	not classify	predicted fimbrial-like adhesin protein
2448125	2453625	1.83399	0.606496	2449094	2449606	yfcR	-	not classify	predicted fimbrial-like adhesin protein
2448125	2453625	1.83399	0.606496	2449606	2450358	yfcS	U	Intracellular trafficking, secretion,and vesicular transport	predicted periplasmic pilus chaperone
2448125	2453625	1.83399	0.606496	2450378	2451274	yfcT	U	Intracellular trafficking, secretion,and vesicular transport	predicted outer membrane export usher protein
2448125	2453625	1.83399	0.606496	2451287	2453023	yfcU	U	Intracellular trafficking, secretion,and vesicular transport	predicted export usher protein
2448125	2453625	1.83399	0.606496	2453105	2453668	yfcV	-	not classify	predicted fimbrial-like adhesin protein
2876500	2877250	1.83137	0.605062	2876877	2877794	ygbT	L	DNA replication, recombination and repair	hypothetical protein
3256375	3257125	1.82314	0.600561	3256307	3257671	tdcG	E	Amino acid transport and metabolism	L-serine dehydratase 3
2391750	2393250	1.82208	0.59998	2391227	2393068	nuoL	P	Inorganic ion transport and metabolism	NADH dehydrogenase subunit L
2391750	2393250	1.82208	0.59998	2393065	2393367	nuoK	C	Energy production and conversion	NADH dehydrogenase subunit K
173000	174250	1.8203	0.599001	171462	173444	fhuB	P	Inorganic ion transport and metabolism	fused iron-hydroxamate transporter subunits of ABC superfamily: membrane components
173000	174250	1.8203	0.599001	173602	174882	hemL	H	Coenzyme metabolism	glutamate-1-semialdehyde aminotransferase
1287500	1289500	1.81573	0.596489	1287005	1287847	purU	F	Nucleotide transport and metabolism	formyltetrahydrofolate deformylase
1287500	1289500	1.81573	0.596489	1287897	1288355	ychJ	S	Function unknown	hypothetical protein
1287500	1289500	1.81573	0.596489	1288429	1289373	rssA	R	General function prediction only	hypothetical protein
1287500	1289500	1.81573	0.596489	1289465	1290478	rssB	K	Transcription	response regulator of RpoS
3178500	3179500	1.81342	0.595214	3178443	3179603	ygiC	-	not classify	predicted enzyme
3916625	3917375	1.80873	0.592626	3916339	3917880	atpA	C	Energy production and conversion	F0F1 ATP synthase subunit alpha
239875	240625	1.80729	0.591828	239419	240189	yafV	R	General function prediction only	predicted C-N hydrolase family amidase, NAD(P)-binding
239875	240625	1.80729	0.591828	240343	240816	ivy	-	not classify	inhibitor of vertebrate C-lysozyme
4518750	4520000	1.80547	0.590821	4518694	4520043	yjhF	E	Amino acid transport and metabolism	KpLE2 phage-like element; predicted transporter
70625	71125	1.79941	0.58746	70387	71265	araC	-	not classify	DNA-binding transcriptional dual regulator
3444000	3445250	1.79917	0.587324	3443629	3444162	rplF	J	Translation, ribosomal structure and biogenesis	50S ribosomal protein L6
3444000	3445250	1.79917	0.587324	3444175	3444567	rpsH	-	not classify	30S ribosomal protein S8
3444000	3445250	1.79917	0.587324	3444601	3444906	rpsN	J	Translation, ribosomal structure and biogenesis	30S ribosomal protein S14
3444000	3445250	1.79917	0.587324	3444921	3445460	rplE	J	Translation, ribosomal structure and biogenesis	50S ribosomal protein L5
284500	289000	1.79722	0.586239	288525	289529	argF	E	Amino acid transport and metabolism	CP4-6 prophage; ornithine carbamoyltransferase 2, chain F
4256625	4257125	1.7971	0.586174	4255765	4257144	dinF	V	Defense mechanisms	DNA-damage-inducible SOS response protein
4496000	4497500	1.79421	0.584564	4496618	4497523	insD-6	L	DNA replication, recombination and repair	KpLE2 phage-like element; IS2 insertion element transposase InsAB'
3079875	3081125	1.79127	0.582927	3080899	3081819	speB	E	Amino acid transport and metabolism	agmatinase
3085750	3086500	1.78996	0.582195	3084728	3085882	metK	H	Coenzyme metabolism	S-adenosylmethionine synthetase
3085750	3086500	1.78996	0.582195	3086306	3087700	galP	-	not classify	D-galactose transporter
1935750	1937000	1.78867	0.581473	1935673	1937115	pykA	-	not classify	pyruvate kinase
4308875	4309375	1.78848	0.581369	4307471	4309003	alsA	G	Carbohydrate transport and metabolism	fused D-allose transporter subunits of ABC superfamily: ATP-binding components
4308875	4309375	1.78848	0.581369	4309130	4310065	alsB	G	Carbohydrate transport and metabolism	D-allose transporter subunit
3712250	3714250	1.78343	0.578541	3712084	3714363	bisC	C	Energy production and conversion	biotin sulfoxide reductase
4534750	4535500	1.78273	0.578145	4534637	4535617	yjhS	-	not classify	hypothetical protein
269125	271625	1.78041	0.576843	268513	269406	perR	K	Transcription	CP4-6 prophage; predicted DNA-binding transcriptional regulator
269125	271625	1.78041	0.576843	269466	269870	insN-1	L	DNA replication, recombination and repair	CP4-6 prophage; partial regulator of insertion element IS911A
269125	271625	1.78041	0.576843	269827	270978	insI-1	L	DNA replication, recombination and repair	CP4-6 prophage; IS30 transposase
269125	271625	1.78041	0.576843	271054	271479	insO-1	L	DNA replication, recombination and repair	CP4-6 prophage; partial transposase of insertion element IS911A
2565375	2568875	1.77923	0.57618	2564903	2566129	eutH	-	not classify	predicted inner membrane protein
2565375	2568875	1.77923	0.57618	2566346	2567533	eutG	C	Energy production and conversion	predicted alcohol dehydrogenase in ethanolamine utilization
2565375	2568875	1.77923	0.57618	2567523	2568359	eutJ	E	Amino acid transport and metabolism	predicted chaperonin, ethanolamine utilization protein
2565375	2568875	1.77923	0.57618	2568370	2569773	eutE	C	Energy production and conversion	predicted aldehyde dehydrogenase, ethanolamine utilization protein
798125	799625	1.77044	0.57123	797809	798804	ybhE	G	Carbohydrate transport and metabolism	6-phosphogluconolactonase
798125	799625	1.77044	0.57123	798845	799861	ybhD	K	Transcription	predicted DNA-binding transcriptional regulator
132125	133125	1.76639	0.568938	131615	134212	acnB	C	Energy production and conversion	aconitate hydratase
350625	353125	1.76417	0.56768	350439	351890	prpD	-	not classify	2-methylcitrate dehydratase
350625	353125	1.76417	0.56768	351930	353816	prpE	I	Lipid metabolism	predicted propionyl-CoA synthetase with ATPase domain
573625	574125	1.76315	0.567104	573960	574976	insH-2	L	DNA replication, recombination and repair	DLP12 prophage; IS5 transposase and trans-activator
1530000	1531750	1.75779	0.564057	1529840	1530976	ydcC	L	DNA replication, recombination and repair	hypothetical protein
1530000	1531750	1.75779	0.564057	1531076	1531309	ydcE	R	General function prediction only	4-oxalocrotonate tautomerase
1530000	1531750	1.75779	0.564057	1531306	1531875	yddH	R	General function prediction only	hypothetical protein
1275500	1277250	1.75712	0.563674	1275045	1276841	narX	T	Signal transduction mechanism	sensory histidine kinase in two-component regulatory system with NarL
1275500	1277250	1.75712	0.563674	1277180	1278571	narK	P	Inorganic ion transport and metabolism	nitrate/nitrite transporter
2636500	2637750	1.74436	0.556391	2635496	2636674	yfgL	S	Function unknown	protein assembly complex, lipoprotein component
2636500	2637750	1.74436	0.556391	2636685	2637305	yfgM	S	Function unknown	hypothetical protein
2636500	2637750	1.74436	0.556391	2637323	2638597	hisS	J	Translation, ribosomal structure and biogenesis	histidyl-tRNA synthetase
1062500	1064500	1.74328	0.55577	1062078	1062998	cbpA	O	Posttranslational modification, protein turnover, chaperones	curved DNA-binding protein, DnaJ homologue that functions as a co-chaperone of DnaK
1062500	1064500	1.74328	0.55577	1063259	1064515	yccE	-	not classify	hypothetical protein
264000	264750	1.74225	0.555178	263972	264430	yafX	-	not classify	CP4-6 prophage; predicted protein
264000	264750	1.74225	0.555178	264528	264767	ykfF	-	not classify	CP4-6 prophage; predicted protein
1274625	1278375	1.74084	0.554366	1274402	1275052	narL	K	Transcription	DNA-binding response regulator in two-component regulatory system with NarX (or NarQ)
1274625	1278375	1.74084	0.554366	1275045	1276841	narX	T	Signal transduction mechanism	sensory histidine kinase in two-component regulatory system with NarL
1274625	1278375	1.74084	0.554366	1277180	1278571	narK	P	Inorganic ion transport and metabolism	nitrate/nitrite transporter
3175875	3176375	1.74008	0.553931	3175303	3175932	nudF	R	General function prediction only	ADP-ribose pyrophosphatase
3175875	3176375	1.74008	0.553931	3176137	3177618	tolC	U	Intracellular trafficking, secretion,and vesicular transport	outer membrane channel precursor protein
3285375	3286625	1.73843	0.55298	3286112	3286807	yraI	U	Intracellular trafficking, secretion,and vesicular transport	predicted periplasmic pilin chaperone
15500	16250	1.73763	0.552521	15445	16557	insL-1	L	DNA replication, recombination and repair	IS186/IS421 transposase
498750	499250	1.737	0.552161	498238	499197	aes	I	Lipid metabolism	acetyl esterase
2686125	2687375	1.73309	0.549907	2685491	2686825	yfhA	T	Signal transduction mechanism	predicted DNA-binding response regulator in two-component system
2686125	2687375	1.73309	0.549907	2686815	2687528	yfhG	-	not classify	hypothetical protein
4241500	4243250	1.73271	0.549687	4240649	4241539	malG	G	Carbohydrate transport and metabolism	maltose transporter subunit
4241500	4243250	1.73271	0.549687	4241554	4243098	malF	G	Carbohydrate transport and metabolism	maltose transporter subunit
1656125	1661625	1.73079	0.54858	1656093	1658519	ynfE	C	Energy production and conversion	oxidoreductase subunit
1656125	1661625	1.73079	0.54858	1658580	1661003	ynfF	C	Energy production and conversion	oxidoreductase subunit
1656125	1661625	1.73079	0.54858	1661014	1661631	ynfG	C	Energy production and conversion	oxidoreductase, Fe-S subunit
1480125	1483125	1.72676	0.546247	1478933	1480225	ynbD	T	Signal transduction mechanism	predicted phosphatase, inner membrane protein
1480125	1483125	1.72676	0.546247	1480279	1480884	acpD	I	Lipid metabolism	acyl carrier protein phosphodiesterase
1480125	1483125	1.72676	0.546247	1481142	1484987	hrpA	L	DNA replication, recombination and repair	ATP-dependent helicase
969875	971625	1.72184	0.543393	970975	971868	ycbJ	-	not classify	hypothetical protein
1857375	1858875	1.72117	0.543005	1856874	1858253	ydjK	-	not classify	predicted transporter
1857375	1858875	1.72117	0.543005	1858280	1859356	ydjL	R	General function prediction only	predicted oxidoreductase, Zn-dependent and NAD(P)-binding
189250	190000	1.71145	0.537343	188712	189506	map	J	Translation, ribosomal structure and biogenesis	methionine aminopeptidase
189250	190000	1.71145	0.537343	189874	190599	rpsB	-	not classify	30S ribosomal protein S2
1539125	1540375	1.70876	0.535768	1536874	1540614	narZ	C	Energy production and conversion	nitrate reductase 2 (NRZ), alpha subunit
644875	646625	1.70541	0.533805	644340	645803	citT	P	Inorganic ion transport and metabolism	citrate:succinate antiporter
644875	646625	1.70541	0.533805	645854	646732	citG	H	Coenzyme metabolism	triphosphoribosyl-dephospho-CoA transferase
2678500	2679750	1.7041	0.533038	2677486	2680767	yphG	-	not classify	hypothetical protein
4007500	4008500	1.7034	0.532625	4007193	4008215	pldB	I	Lipid metabolism	lysophospholipase L(2)
4007500	4008500	1.7034	0.532625	4008223	4009023	yigL	R	General function prediction only	predicted hydrolase
445875	451875	1.70113	0.53129	444526	445890	yajR	-	not classify	predicted transporter
445875	451875	1.70113	0.53129	446039	446929	cyoE	O	Posttranslational modification, protein turnover, chaperones	protoheme IX farnesyltransferase
445875	451875	1.70113	0.53129	446941	447270	cyoD	C	Energy production and conversion	cytochrome o ubiquinol oxidase subunit IV
445875	451875	1.70113	0.53129	447270	447884	cyoC	C	Energy production and conversion	cytochrome o ubiquinol oxidase subunit III
445875	451875	1.70113	0.53129	447874	449865	cyoB	C	Energy production and conversion	cytochrome o ubiquinol oxidase subunit I
445875	451875	1.70113	0.53129	449887	450834	cyoA	C	Energy production and conversion	cytochrome o ubiquinol oxidase subunit II
445875	451875	1.70113	0.53129	451294	452769	ampG	-	not classify	muropeptide transporter
3901875	3902875	1.69975	0.530483	3901743	3903620	bglF	G	Carbohydrate transport and metabolism	fused beta-glucoside-specific PTS enzymes: IIA component/IIB component/IIC component
4220500	4223500	1.69834	0.52965	4218324	4220510	arpA	-	not classify	regulator of acetyl CoA synthetase
4220500	4223500	1.69834	0.52965	4220827	4221651	iclR	K	Transcription	DNA-binding transcriptional repressor
4220500	4223500	1.69834	0.52965	4221851	4225534	metH	E	Amino acid transport and metabolism	B12-dependent methionine synthase
1419750	1420750	1.69286	0.52642	1419143	1420000	ydaU	S	Function unknown	Rac prophage; conserved protein
1419750	1420750	1.69286	0.52642	1420007	1420753	ydaV	L	DNA replication, recombination and repair	Rac prophage; predicted DNA replication protein
3724500	3725250	1.69175	0.525765	3723910	3724905	yiaH	S	Function unknown	conserved inner membrane protein
3724500	3725250	1.69175	0.525765	3724947	3725384	yiaA	S	Function unknown	conserved inner membrane protein
2182000	2182750	1.69117	0.525422	2181738	2182538	thiD	H	Coenzyme metabolism	phosphomethylpyrimidine kinase
2182000	2182750	1.69117	0.525422	2182535	2183323	thiM	H	Coenzyme metabolism	hydroxyethylthiazole kinase
4509375	4510125	1.68948	0.52442	4508713	4509480	fecE	H	Coenzyme metabolism	KpLE2 phage-like element; iron-dicitrate transporter subunit
4509375	4510125	1.68948	0.52442	4509481	4510437	fecD	P	Inorganic ion transport and metabolism	KpLE2 phage-like element; iron-dicitrate transporter subunit
3913125	3914125	1.68795	0.523517	3911853	3913223	glmU	M	Cell envelope biogenesis, outer membrane	bifunctional N-acetylglucosamine-1-phosphate uridyltransferase/glucosamine-1-phosphate acetyltransferase
3913125	3914125	1.68795	0.523517	3913576	3913995	atpC	-	not classify	F0F1 ATP synthase subunit epsilon
3913125	3914125	1.68795	0.523517	3914016	3915398	atpD	C	Energy production and conversion	F0F1 ATP synthase subunit beta
1894625	1895375	1.68522	0.521895	1894194	1894772	yeaB	-	not classify	predicted NUDIX hydrolase
1894625	1895375	1.68522	0.521895	1894956	1896320	sdaA	E	Amino acid transport and metabolism	L-serine deaminase I
1406250	1407250	1.68357	0.520918	1406074	1407057	ydaN	P	Inorganic ion transport and metabolism	zinc transporter
4312375	4313625	1.68072	0.519219	4312367	4313125	phnP	R	General function prediction only	carbon-phosphorus lyase complex accessory protein
4312375	4313625	1.68072	0.519219	4313127	4313561	phnO	-	not classify	predicted acyltransferase with acyl-CoA N-acyltransferase domain
4312375	4313625	1.68072	0.519219	4313548	4314105	phnN	P	Inorganic ion transport and metabolism	ribose 1,5-bisphosphokinase
1065125	1065875	1.67553	0.516128	1064808	1066049	agp	-	not classify	glucose-1-phosphatase/inositol phosphatase
2178125	2179125	1.67541	0.516058	2178117	2179121	yegU	-	not classify	predicted hydrolase
2178125	2179125	1.67541	0.516058	2179118	2180083	yegV	G	Carbohydrate transport and metabolism	predicted kinase
1643375	1644375	1.67393	0.515175	1643370	1643657	relE	D	Cell division and chromosome partitioning	Qin prophage; toxin of the RelE-RelB toxin-antitoxin system
1643375	1644375	1.67393	0.515175	1643657	1643896	relB	L	DNA replication, recombination and repair	Qin prophage; bifunctional antitoxin of the RelE-RelB toxin-antitoxin system/ transcriptional repressor
1643375	1644375	1.67393	0.515175	1643921	1644226	ydfV	-	not classify	Qin prophage; predicted protein
4508500	4510750	1.67047	0.513104	4510434	4511432	fecC	P	Inorganic ion transport and metabolism	KpLE2 phage-like element; iron-dicitrate transporter subunit
2252750	2254000	1.67003	0.512839	2252267	2253208	rihB	F	Nucleotide transport and metabolism	ribonucleoside hydrolase 2
2252750	2254000	1.67003	0.512839	2253377	2254036	yeiL	T	Signal transduction mechanism	DNA-binding transcriptional activator of stationary phase nitrogen survival
827000	829750	1.66564	0.510209	826468	828204	ybhF	V	Defense mechanisms	fused predicted transporter subunits of ABC superfamily: ATP-binding components
827000	829750	1.66564	0.510209	828197	829195	ybhG	M	Cell envelope biogenesis, outer membrane	hypothetical protein
827000	829750	1.66564	0.510209	829195	829866	ybiH	-	not classify	predicted DNA-binding transcriptional regulator
1027000	1027750	1.6644	0.509466	1027627	1027995	yccV	S	Function unknown	DNA-binding protein, hemimethylated
1834125	1835125	1.65881	0.506101	1834097	1835263	ynjB	R	General function prediction only	hypothetical protein
1119125	1120125	1.65692	0.504962	1118691	1119809	solA	E	Amino acid transport and metabolism	N-methyltryptophan oxidase, FAD-binding
1119125	1120125	1.65692	0.504962	1119924	1120178	yceP	-	not classify	hypothetical protein
1873750	1876000	1.65504	0.503828	1873697	1874878	yeaN	P	Inorganic ion transport and metabolism	predicted transporter
1873750	1876000	1.65504	0.503828	1874933	1875280	yeaO	S	Function unknown	hypothetical protein
1873750	1876000	1.65504	0.503828	1875302	1875556	yoaF	R	General function prediction only	conserved outer membrane protein
1873750	1876000	1.65504	0.503828	1875739	1876764	yeaP	-	not classify	predicted diguanylate cyclase
2525500	2528500	1.65417	0.503297	2524968	2525966	yfeH	R	General function prediction only	predicted inner membrane protein
2525500	2528500	1.65417	0.503297	2525963	2526181	ypeB	S	Function unknown	hypothetical protein
2525500	2528500	1.65417	0.503297	2526183	2528198	ligA	L	DNA replication, recombination and repair	NAD-dependent DNA ligase LigA
2525500	2528500	1.65417	0.503297	2528269	2529255	zipA	D	Cell division and chromosome partitioning	cell division protein ZipA
1778500	1779250	1.65052	0.501091	1778425	1779363	ydiR	C	Energy production and conversion	predicted electron transfer flavoprotein, FAD-binding
3694250	3695500	1.6503	0.500958	3694481	3696052	bcsE	-	not classify	hypothetical protein
3670250	3670750	1.64409	0.497189	3670365	3671336	yhjC	K	Transcription	predicted DNA-binding transcriptional regulator
3572500	3573000	1.64333	0.496723	3571798	3572901	asd	E	Amino acid transport and metabolism	aspartate-semialdehyde dehydrogenase
289875	291375	1.64236	0.496137	289873	290376	insB-3	L	DNA replication, recombination and repair	CP4-6 prophage; IS1 transposase InsAB'
289875	291375	1.64236	0.496137	290295	290570	insA-3	L	DNA replication, recombination and repair	CP4-6 prophage; IS1 repressor protein InsA
289875	291375	1.64236	0.496137	290724	291455	yagJ	-	not classify	CP4-6 prophage; predicted protein
699375	699875	1.64207	0.495957	698797	699549	nagD	G	Carbohydrate transport and metabolism	UMP phosphatase
699375	699875	1.64207	0.495957	699597	700817	nagC	G	Carbohydrate transport and metabolism	DNA-binding transcriptional dual regulator, repressor of N-acetylglucosamine
3763500	3764000	1.64156	0.495645	3760206	3764339	rhsA	M	Cell envelope biogenesis, outer membrane	rhsA element core protein RshA
269125	273375	1.64127	0.495468	268513	269406	perR	K	Transcription	CP4-6 prophage; predicted DNA-binding transcriptional regulator
269125	273375	1.64127	0.495468	269466	269870	insN-1	L	DNA replication, recombination and repair	CP4-6 prophage; partial regulator of insertion element IS911A
269125	273375	1.64127	0.495468	269827	270978	insI-1	L	DNA replication, recombination and repair	CP4-6 prophage; IS30 transposase
269125	273375	1.64127	0.495468	271054	271479	insO-1	L	DNA replication, recombination and repair	CP4-6 prophage; partial transposase of insertion element IS911A
269125	273375	1.64127	0.495468	272071	273216	ykfC	L	DNA replication, recombination and repair	CP4-6 prophage; conserved protein
269125	273375	1.64127	0.495468	273325	274341	insH-1	L	DNA replication, recombination and repair	CP4-6 prophage; IS5 transposase and trans-activator
2974750	2977250	1.64025	0.494849	2974621	2975652	galR	K	Transcription	DNA-binding transcriptional repressor
2974750	2977250	1.64025	0.494849	2975659	2976921	lysA	E	Amino acid transport and metabolism	diaminopimelate decarboxylase, PLP-binding
2974750	2977250	1.64025	0.494849	2977043	2977978	lysR	K	Transcription	DNA-binding transcriptional dual regulator
1656250	1659500	1.63116	0.48929	1656093	1658519	ynfE	C	Energy production and conversion	oxidoreductase subunit
1656250	1659500	1.63116	0.48929	1658580	1661003	ynfF	C	Energy production and conversion	oxidoreductase subunit
3020500	3021250	1.6255	0.485814	3019338	3022208	xdhD	C	Energy production and conversion	fused predicted xanthine/hypoxanthine oxidase: molybdopterin-binding subunit/Fe-S binding subunit
1130250	1137500	1.62462	0.485271	1130241	1130657	flgB	N	Cell motility and secretion	flagellar basal-body rod protein B
1130250	1137500	1.62462	0.485271	1130661	1131065	flgC	N	Cell motility and secretion	flagellar basal-body rod protein C
1130250	1137500	1.62462	0.485271	1131077	1131772	flgD	N	Cell motility and secretion	flagellar basal body rod modification protein D
1130250	1137500	1.62462	0.485271	1131797	1133005	flgE	N	Cell motility and secretion	flagellar hook protein E
1130250	1137500	1.62462	0.485271	1133025	1133780	flgF	N	Cell motility and secretion	flagellar component of cell-proximal portion of basal-body rod
1130250	1137500	1.62462	0.485271	1133952	1134734	flgG	N	Cell motility and secretion	flagellar component of cell-distal portion of basal-body rod
1130250	1137500	1.62462	0.485271	1134787	1135485	flgH	N	Cell motility and secretion	flagellar L-ring protein precursor H
1130250	1137500	1.62462	0.485271	1135497	1136594	flgI	N	Cell motility and secretion	flagellar P-ring protein precursor I
1130250	1137500	1.62462	0.485271	1136594	1137535	flgJ	O	Posttranslational modification, protein turnover, chaperones	flagellar biosynthesis protein FlgJ
4267125	4267625	1.62459	0.485257	4267437	4268150	aphA	R	General function prediction only	acid phosphatase/phosphotransferase, class B, non-specific
3444125	3445125	1.62393	0.484846	3443629	3444162	rplF	J	Translation, ribosomal structure and biogenesis	50S ribosomal protein L6
3444125	3445125	1.62393	0.484846	3444175	3444567	rpsH	-	not classify	30S ribosomal protein S8
3444125	3445125	1.62393	0.484846	3444601	3444906	rpsN	J	Translation, ribosomal structure and biogenesis	30S ribosomal protein S14
3444125	3445125	1.62393	0.484846	3444921	3445460	rplE	J	Translation, ribosomal structure and biogenesis	50S ribosomal protein L5
2417500	2418000	1.62227	0.483825	2417256	2417810	yfcE	R	General function prediction only	phosphodiesterase
2417500	2418000	1.62227	0.483825	2417863	2418507	yfcF	O	Posttranslational modification, protein turnover, chaperones	predicted enzyme
3366500	3367250	1.61534	0.479547	3365849	3366976	yhcG	S	Function unknown	hypothetical protein
3366500	3367250	1.61534	0.479547	3367036	3367500	yhcH	-	not classify	hypothetical protein
4247250	4248000	1.6136	0.478465	4245994	4247334	lamB	-	not classify	maltoporin precursor
4247250	4248000	1.6136	0.478465	4247577	4248497	malM	-	not classify	maltose regulon periplasmic protein
3103500	3104250	1.61211	0.477545	3102455	3103534	mltC	M	Cell envelope biogenesis, outer membrane	membrane-bound lytic murein transglycosylase C
3103500	3104250	1.61211	0.477545	3103736	3104992	nupG	-	not classify	nucleoside transporter
4489250	4491250	1.61087	0.476772	4489229	4490548	idnT	E	Amino acid transport and metabolism	L-idonate and D-gluconate transporter
4489250	4491250	1.61087	0.476772	4490610	4491374	idnO	R	General function prediction only	gluconate 5-dehydrogenase
666000	667750	1.6085	0.475304	665539	667440	mrdA	M	Cell envelope biogenesis, outer membrane	transpeptidase involved in peptidoglycan synthesis (penicillin-binding protein 2)
666000	667750	1.6085	0.475304	667471	667938	ybeA	S	Function unknown	hypothetical protein
2595875	2598875	1.60722	0.474509	2595853	2596887	nlpB	M	Cell envelope biogenesis, outer membrane	lipoprotein
2595875	2598875	1.60722	0.474509	2596904	2597782	dapA	M	Cell envelope biogenesis, outer membrane	dihydrodipicolinate synthase
2595875	2598875	1.60722	0.474509	2597928	2598500	gcvR	E	Amino acid transport and metabolism	DNA-binding transcriptional repressor, regulatory protein accessory to GcvA
2595875	2598875	1.60722	0.474509	2598500	2598970	bcp	O	Posttranslational modification, protein turnover, chaperones	thioredoxin-dependent thiol peroxidase
2935875	2938375	1.60533	0.473329	2935460	2936908	fucK	G	Carbohydrate transport and metabolism	L-fuculokinase
2935875	2938375	1.60533	0.473329	2936910	2937332	fucU	G	Carbohydrate transport and metabolism	L-fucose mutarotase
2935875	2938375	1.60533	0.473329	2937390	2938121	fucR	G	Carbohydrate transport and metabolism	DNA-binding transcriptional activator
2935875	2938375	1.60533	0.473329	2938165	2939265	ygdE	R	General function prediction only	predicted methyltransferase
243750	244250	1.60443	0.47277	243543	244121	lpcA	G	Carbohydrate transport and metabolism	phosphoheptose isomerase
4333625	4335375	1.6042	0.472627	4335191	4335952	adiY	-	not classify	DNA-binding transcriptional activator
2239125	2239875	1.60088	0.470551	2238650	2239690	galS	K	Transcription	DNA-binding transcriptional repressor
2239125	2239875	1.60088	0.470551	2239832	2240989	yeiB	S	Function unknown	conserved inner membrane protein
1373375	1374125	1.595	0.466875	1372987	1374039	ycjQ	R	General function prediction only	predicted oxidoreductase, Zn-dependent and NAD(P)-binding
1373375	1374125	1.595	0.466875	1374058	1374846	ycjR	G	Carbohydrate transport and metabolism	predicted enzyme
2550375	2551125	1.59397	0.466228	2550374	2551243	amiA	M	Cell envelope biogenesis, outer membrane	N-acetylmuramoyl-l-alanine amidase I
4176000	4176500	1.59137	0.464598	4175766	4176311	nusG	K	Transcription	transcription antitermination protein NusG
4176000	4176500	1.59137	0.464598	4176470	4176898	rplK	-	not classify	50S ribosomal protein L11
3934000	3934750	1.58954	0.463444	3933311	3934276	rbsC	G	Carbohydrate transport and metabolism	ribose ABC transporter permease protein
3934000	3934750	1.58954	0.463444	3934301	3935191	rbsB	G	Carbohydrate transport and metabolism	D-ribose transporter subunit
4190375	4190875	1.58912	0.46318	4189888	4190658	thiG	H	Coenzyme metabolism	thiazole synthase
4190375	4190875	1.58912	0.46318	4190660	4190860	thiS	H	Coenzyme metabolism	sulfur carrier protein ThiS
4190375	4190875	1.58912	0.46318	4190844	4191599	thiF	H	Coenzyme metabolism	thiamine biosynthesis protein ThiF
3111500	3112750	1.5845	0.46027	3112572	3117134	yghJ	-	not classify	predicted inner membrane lipoprotein
1555000	1556000	1.58065	0.457838	1554649	1555080	osmC	O	Posttranslational modification, protein turnover, chaperones	osmotically inducible, stress-inducible membrane protein
1555000	1556000	1.58065	0.457838	1555136	1556062	ddpF	P	Inorganic ion transport and metabolism	D-ala-D-ala transporter subunit
3232625	3233625	1.57715	0.455619	3232761	3233897	ygjO	J	Translation, ribosomal structure and biogenesis	predicted methyltransferase small domain
715750	717250	1.57596	0.454864	715611	715820	ybfH	-	not classify	hypothetical protein
715750	717250	1.57596	0.454864	716169	717488	potE	E	Amino acid transport and metabolism	putrescine/proton symporter: putrescine/ornithine antiporter
2876500	2877000	1.5664	0.448778	2876877	2877794	ygbT	L	DNA replication, recombination and repair	hypothetical protein
746500	749500	1.56411	0.447318	745946	746992	abrB	R	General function prediction only	predicted regulator
746500	749500	1.56411	0.447318	747144	748205	ybgO	-	not classify	predicted fimbrial-like adhesin protein
746500	749500	1.56411	0.447318	748202	748930	ybgP	U	Intracellular trafficking, secretion,and vesicular transport	predicted assembly protein
746500	749500	1.56411	0.447318	748945	751392	ybgQ	U	Intracellular trafficking, secretion,and vesicular transport	predicted outer membrane protein
514000	514500	1.56348	0.446914	513625	514080	ybbJ	U	Intracellular trafficking, secretion,and vesicular transport	conserved inner membrane protein
514000	514500	1.56348	0.446914	514080	514997	ybbK	O	Posttranslational modification, protein turnover, chaperones	predicted protease, membrane anchored
4449250	4449750	1.5594	0.444303	4449081	4450583	ytfR	G	Carbohydrate transport and metabolism	predicted sugar transporter subunit: ATP-binding component of ABC superfamily
1576125	1577625	1.55574	0.441949	1575681	1577366	yddA	R	General function prediction only	fused predicted multidrug transporter subunits of ABC superfamily: membrane component/ATP-binding component
1733750	1734750	1.55442	0.4411	1733402	1733983	sodB	P	Inorganic ion transport and metabolism	superoxide dismutase, Fe
1733750	1734750	1.55442	0.4411	1734145	1735314	ydhP	G	Carbohydrate transport and metabolism	predicted transporter
1447375	1449375	1.55385	0.440737	1447100	1449373	tynA	-	not classify	tyramine oxidase, copper-requiring
1244750	1247000	1.54937	0.437846	1244383	1244823	ycgY	-	not classify	hypothetical protein
1244750	1247000	1.54937	0.437846	1244902	1246599	treA	G	Carbohydrate transport and metabolism	periplasmic trehalase
1244750	1247000	1.54937	0.437846	1246919	1248337	dhaH	S	Function unknown	fused predicted dihydroxyacetone-specific PTS enzymes: HPr component/EI component
4547375	4548125	1.54665	0.436092	4546831	4547733	fimH	-	not classify	minor component of type 1 fimbriae
4547375	4548125	1.54665	0.436092	4547976	4549319	gntP	E	Amino acid transport and metabolism	fructuronate transporter
4304500	4306750	1.54508	0.435078	4302635	4304620	yjcS	Q	Secondary metabolites biosynthesis, transport and catabolism	predicted alkyl sulfatase
4304500	4306750	1.54508	0.435078	4304893	4305822	alsK	G	Carbohydrate transport and metabolism	D-allose kinase
4304500	4306750	1.54508	0.435078	4305806	4306501	alsE	G	Carbohydrate transport and metabolism	allulose-6-phosphate 3-epimerase
4304500	4306750	1.54508	0.435078	4306512	4307492	alsC	G	Carbohydrate transport and metabolism	D-allose transporter subunit
1786500	1787250	1.54497	0.435002	1786459	1787505	aroH	E	Amino acid transport and metabolism	3-deoxy-D-arabino-heptulosonate-7-phosphate synthase, tryptophan repressible
2980625	2982625	1.53881	0.431008	2980519	2981280	kduD	R	General function prediction only	2-deoxy-D-gluconate 3-dehydrogenase
2980625	2982625	1.53881	0.431008	2981310	2982146	kduI	G	Carbohydrate transport and metabolism	5-keto-4-deoxyuronate isomerase
2980625	2982625	1.53881	0.431008	2982433	2983614	yqeF	I	Lipid metabolism	acetyl-CoA acetyltransferase
4211500	4212000	1.53718	0.429948	4211257	4211640	yjaA	-	not classify	hypothetical protein
4211500	4212000	1.53718	0.429948	4211703	4212146	yjaB	-	not classify	predicted acetyltransferase
9000	10000	1.53703	0.42985	8238	9191	talB	-	not classify	transaldolase B
9000	10000	1.53703	0.42985	9306	9893	mogA	-	not classify	molybdenum cofactor biosynthesis protein
9000	10000	1.53703	0.42985	9928	10494	yaaH	S	Function unknown	conserved inner membrane protein associated with acetate transport
3602000	3602750	1.53693	0.429786	3600773	3602266	ftsY	U	Intracellular trafficking, secretion,and vesicular transport	fused Signal Recognition Particle (SRP) receptor: membrane binding protein/conserved protein
3602000	3602750	1.53693	0.429786	3602416	3603012	yhhF	L	DNA replication, recombination and repair	predicted methyltransferase
2004375	2005625	1.5314	0.426186	2004180	2005667	amyA	-	not classify	cytoplasmic alpha-amylase
4032750	4035000	1.52905	0.424647	4032631	4033176	hemG	H	Coenzyme metabolism	protoporphyrin oxidase, flavoprotein
1338625	1339875	1.5289	0.42455	1338582	1339751	yciM	G	Carbohydrate transport and metabolism	hypothetical protein
340500	341500	1.52484	0.421892	340349	341731	yahJ	R	General function prediction only	deaminase
1119000	1120250	1.52441	0.42161	1118691	1119809	solA	E	Amino acid transport and metabolism	N-methyltryptophan oxidase, FAD-binding
1119000	1120250	1.52441	0.42161	1119924	1120178	yceP	-	not classify	hypothetical protein
2799125	2802375	1.52419	0.421461	2798987	2799397	nrdI	F	Nucleotide transport and metabolism	hypothetical protein
2799125	2802375	1.52419	0.421461	2799370	2801514	nrdE	F	Nucleotide transport and metabolism	ribonucleotide-diphosphate reductase alpha subunit
2799125	2802375	1.52419	0.421461	2801524	2802483	nrdF	F	Nucleotide transport and metabolism	ribonucleotide-diphosphate reductase beta subunit
2597500	2598250	1.52386	0.421244	2596904	2597782	dapA	M	Cell envelope biogenesis, outer membrane	dihydrodipicolinate synthase
2597500	2598250	1.52386	0.421244	2597928	2598500	gcvR	E	Amino acid transport and metabolism	DNA-binding transcriptional repressor, regulatory protein accessory to GcvA
3958250	3959500	1.5228	0.420548	3958035	3958310	yifO	S	Function unknown	hypothetical protein
3958250	3959500	1.5228	0.420548	3958265	3958483	yifN	S	Function unknown	conserved protein (pseudogene)
3958250	3959500	1.5228	0.420548	3958700	3960721	rep	L	DNA replication, recombination and repair	DNA helicase and single-stranded DNA-dependent ATPase
4586875	4587875	1.5154	0.415681	4585932	4586888	yjiA	R	General function prediction only	predicted GTPase
4586875	4587875	1.5154	0.415681	4586899	4587102	yjiX	-	not classify	hypothetical protein
4586875	4587875	1.5154	0.415681	4587152	4589302	yjiY	T	Signal transduction mechanism	predicted inner membrane protein
3360375	3363375	1.51451	0.41509	3360134	3360808	yhcA	U	Intracellular trafficking, secretion,and vesicular transport	predicted periplasmic chaperone protein
3360375	3363375	1.51451	0.41509	3360829	3363210	yhcD	U	Intracellular trafficking, secretion,and vesicular transport	predicted outer membrane protein
531875	532875	1.51128	0.412956	531675	532157	allA	F	Nucleotide transport and metabolism	ureidoglycolate hydrolase
531875	532875	1.51128	0.412956	532235	533050	allR	K	Transcription	DNA-binding transcriptional repressor
1313875	1315625	1.51048	0.412429	1315246	1316439	trpB	E	Amino acid transport and metabolism	tryptophan synthase subunit beta
3301625	3304125	1.50875	0.411279	3301470	3302477	yhbW	C	Energy production and conversion	predicted enzyme
3301625	3304125	1.50875	0.411279	3302595	3303839	mtr	E	Amino acid transport and metabolism	tryptophan transporter of high affinity
3301625	3304125	1.50875	0.411279	3303993	3305882	deaD	J	Translation, ribosomal structure and biogenesis	ATP-dependent RNA helicase
2175500	2176000	1.5087	0.411249	2175534	2176586	fbaB	G	Carbohydrate transport and metabolism	fructose-bisphosphate aldolase
4079875	4080875	1.50725	0.410284	4079248	4079883	fdoI	C	Energy production and conversion	formate dehydrogenase-O, cytochrome b556 subunit
4079875	4080875	1.50725	0.410284	4079880	4080782	fdoH	C	Energy production and conversion	formate dehydrogenase-O, Fe-S subunit
4079875	4080875	1.50725	0.410284	4080795	4083845	fdoG	C	Energy production and conversion	formate dehydrogenase-O, large subunit
3018625	3019375	1.50704	0.410146	3018562	3019341	ygfM	-	not classify	predicted oxidoreductase
3018625	3019375	1.50704	0.410146	3019338	3022208	xdhD	C	Energy production and conversion	fused predicted xanthine/hypoxanthine oxidase: molybdopterin-binding subunit/Fe-S binding subunit
2929625	2930875	1.50315	0.407564	2928987	2929832	xni	L	DNA replication, recombination and repair	exonuclease IX
2929625	2930875	1.50315	0.407564	2929887	2931038	fucO	C	Energy production and conversion	L-1,2-propanediol oxidoreductase
4047250	4047750	1.50184	0.406693	4044989	4047775	polA	L	DNA replication, recombination and repair	DNA polymerase I
27125	28625	1.5015	0.406464	26277	27227	ispH	-	not classify	4-hydroxy-3-methylbut-2-enyl diphosphate reductase
27125	28625	1.5015	0.406464	27293	28207	rihC	F	Nucleotide transport and metabolism	ribonucleoside hydrolase 3
27125	28625	1.5015	0.406464	28374	29195	dapB	E	Amino acid transport and metabolism	dihydrodipicolinate reductase
3717250	3717750	1.50084	0.406024	3717501	3717791	yiaG	K	Transcription	predicted transcriptional regulator
1644875	1645375	1.49797	0.404109	1645370	1645660	ydfX	-	not classify	Qin prophage; predicted protein
925000	925500	1.49433	0.401679	925448	925666	infA	J	Translation, ribosomal structure and biogenesis	translation initiation factor IF-1
132125	133375	1.4914	0.399716	131615	134212	acnB	C	Energy production and conversion	aconitate hydratase
210250	213250	1.48765	0.397201	209679	211820	ldcC	E	Amino acid transport and metabolism	lysine decarboxylase 2, constitutive
210250	213250	1.48765	0.397201	211877	212266	yaeR	E	Amino acid transport and metabolism	predicted lyase
210250	213250	1.48765	0.397201	212331	213629	tilS	D	Cell division and chromosome partitioning	tRNA(Ile)-lysidine synthetase
3866125	3868875	1.48753	0.397114	3866085	3867299	yidR	-	not classify	hypothetical protein
3866125	3868875	1.48753	0.397114	3867400	3868464	cbrA	C	Energy production and conversion	predicted oxidoreductase with FAD/NAD(P)-binding domain
3866125	3868875	1.48753	0.397114	3868461	3869753	dgoT	-	not classify	D-galactonate transporter
4175875	4176625	1.48565	0.395853	4175766	4176311	nusG	K	Transcription	transcription antitermination protein NusG
4175875	4176625	1.48565	0.395853	4176470	4176898	rplK	-	not classify	50S ribosomal protein L11
1447375	1449625	1.48517	0.395531	1447100	1449373	tynA	-	not classify	tyramine oxidase, copper-requiring
1447375	1449625	1.48517	0.395531	1449621	1451666	maoC	C	Energy production and conversion	fused aldehyde dehydrogenase/enoyl-CoA hydratase
4314125	4315375	1.48186	0.393299	4314105	4315241	phnM	P	Inorganic ion transport and metabolism	carbon-phosphorus lyase complex subunit
4314125	4315375	1.48186	0.393299	4315238	4315918	phnL	P	Inorganic ion transport and metabolism	carbon-phosphorus lyase complex subunit
1362250	1365250	1.48051	0.392389	1360767	1362254	puuC	C	Energy production and conversion	gamma-Glu-gamma-aminobutyraldehyde dehydrogenase, NAD(P)H-dependent
1362250	1365250	1.48051	0.392389	1362256	1363536	puuB	E	Amino acid transport and metabolism	gamma-Glu-putrescine oxidase, FAD/NAD(P)-binding
1362250	1365250	1.48051	0.392389	1363574	1364839	puuE	E	Amino acid transport and metabolism	GABA aminotransferase, PLP-dependent
1362250	1365250	1.48051	0.392389	1364959	1365936	pspF	T	Signal transduction mechanism	DNA-binding transcriptional activator
443750	445250	1.47962	0.391783	444526	445890	yajR	-	not classify	predicted transporter
260000	262000	1.47928	0.391556	259612	260715	proB	E	Amino acid transport and metabolism	gamma-glutamyl kinase
260000	262000	1.47928	0.391556	260727	261980	proA	E	Amino acid transport and metabolism	gamma-glutamyl phosphate reductase
1480000	1483250	1.4781	0.390758	1478933	1480225	ynbD	T	Signal transduction mechanism	predicted phosphatase, inner membrane protein
1480000	1483250	1.4781	0.390758	1480279	1480884	acpD	I	Lipid metabolism	acyl carrier protein phosphodiesterase
1480000	1483250	1.4781	0.390758	1481142	1484987	hrpA	L	DNA replication, recombination and repair	ATP-dependent helicase
4233625	4234875	1.47725	0.390182	4234285	4234923	yjbF	-	not classify	predicted lipoprotein
444250	445250	1.47708	0.390065	443907	444398	yajQ	-	not classify	nucleotide-binding protein
444250	445250	1.47708	0.390065	444526	445890	yajR	-	not classify	predicted transporter
571500	572500	1.4768	0.389875	572307	572597	ybcO	-	not classify	DLP12 prophage; predicted protein
52125	52625	1.47346	0.387614	51609	52430	ksgA	J	Translation, ribosomal structure and biogenesis	dimethyladenosine transferase
52125	52625	1.47346	0.387614	52427	53416	pdxA	-	not classify	4-hydroxythreonine-4-phosphate dehydrogenase
2209375	2211375	1.46724	0.383382	2209247	2209708	yehR	-	not classify	hypothetical protein
2209375	2211375	1.46724	0.383382	2209748	2210218	yehS	-	not classify	hypothetical protein
2209375	2211375	1.46724	0.383382	2210265	2210984	yehT	T	Signal transduction mechanism	predicted response regulator in two-component system withYehU
2209375	2211375	1.46724	0.383382	2210981	2212666	yehU	T	Signal transduction mechanism	predicted sensory kinase in two-component system with YehT
577000	577500	1.46652	0.382893	576836	577333	ybcS	R	General function prediction only	DLP12 prophage; predicted lysozyme
577000	577500	1.46652	0.382893	577330	577791	rzpD	-	not classify	DLP12 prophage; predicted murein endopeptidase
2132625	2134625	1.46282	0.380368	2131514	2133676	wzc	M	Cell envelope biogenesis, outer membrane	protein-tyrosine kinase
2132625	2134625	1.46282	0.380368	2133679	2134122	wzb	T	Signal transduction mechanism	protein-tyrosine phosphatase
2132625	2134625	1.46282	0.380368	2134128	2135267	wza	-	not classify	lipoprotein required for capsular polysaccharide translocation through the outer membrane
4624500	4626500	1.46226	0.379985	4623935	4625317	radA	O	Posttranslational modification, protein turnover, chaperones	predicted repair protein
4624500	4626500	1.46226	0.379985	4625338	4626570	nadR	H	Coenzyme metabolism	nicotinamide-nucleotide adenylyltransferase
1516625	1518625	1.46171	0.379604	1516352	1516870	yncA	M	Cell envelope biogenesis, outer membrane	predicted acyltransferase with acyl-CoA N-acyltransferase domain
1516625	1518625	1.46171	0.379604	1517051	1518088	yncB	R	General function prediction only	predicted oxidoreductase, Zn-dependent and NAD(P)-binding
1516625	1518625	1.46171	0.379604	1518286	1518951	yncC	K	Transcription	predicted DNA-binding transcriptional regulator
3774375	3775125	1.45978	0.378283	3774194	3774403	yibT	-	not classify	hypothetical protein
3774375	3775125	1.45978	0.378283	3774688	3775050	yibL	-	not classify	hypothetical protein
699250	701500	1.45839	0.377334	698797	699549	nagD	G	Carbohydrate transport and metabolism	UMP phosphatase
699250	701500	1.45839	0.377334	699597	700817	nagC	G	Carbohydrate transport and metabolism	DNA-binding transcriptional dual regulator, repressor of N-acetylglucosamine
699250	701500	1.45839	0.377334	700826	701974	nagA	G	Carbohydrate transport and metabolism	N-acetylglucosamine-6-phosphate deacetylase
1427625	1428125	1.45356	0.374013	1427073	1430435	stfR	-	not classify	Rac prophage; predicted tail fiber protein
1833750	1835250	1.45078	0.372101	1833539	1834087	ynjA	S	Function unknown	hypothetical protein
1833750	1835250	1.45078	0.372101	1834097	1835263	ynjB	R	General function prediction only	hypothetical protein
4441750	4445750	1.44685	0.369386	4440405	4442138	ytfM	M	Cell envelope biogenesis, outer membrane	predicted outer membrane protein and surface antigen
4441750	4445750	1.44685	0.369386	4442135	4445914	ytfN	S	Function unknown	hypothetical protein
3603125	3603625	1.44547	0.368433	3603002	3603271	yhhL	-	not classify	conserved inner membrane protein
3603125	3603625	1.44547	0.368433	3603274	3603633	yhhM	-	not classify	hypothetical protein
1218250	1219000	1.44466	0.367874	1218206	1218424	ymgF	-	not classify	hypothetical protein
3377000	3378000	1.44451	0.367768	3376892	3378019	yhcM	R	General function prediction only	conserved protein with nucleoside triphosphate hydrolase domain
954500	957000	1.44116	0.365449	954095	955855	ycaO	S	Function unknown	hypothetical protein
954500	957000	1.44116	0.365449	955985	956677	ycaP	-	not classify	conserved inner membrane protein
954500	957000	1.44116	0.365449	956876	957964	serC	E	Amino acid transport and metabolism	phosphoserine aminotransferase
3079875	3081375	1.43899	0.363942	3080899	3081819	speB	E	Amino acid transport and metabolism	agmatinase
2192750	2196000	1.43742	0.362853	2192322	2194355	metG	R	General function prediction only	methionyl-tRNA synthetase
2145125	2149625	1.43364	0.360217	2144716	2145564	alkA	L	DNA replication, recombination and repair	3-methyl-adenine DNA glycosylase II
2145125	2149625	1.43364	0.360217	2145698	2147050	yegD	O	Posttranslational modification, protein turnover, chaperones	predicted chaperone
2145125	2149625	1.43364	0.360217	2147063	2149009	yegI	R	General function prediction only	hypothetical protein
2145125	2149625	1.43364	0.360217	2149209	2149670	yegJ	S	Function unknown	hypothetical protein
2398750	2400750	1.43326	0.359951	2398240	2399577	nuoF	C	Energy production and conversion	NADH:ubiquinone oxidoreductase, chain F
2398750	2400750	1.43326	0.359951	2399574	2400074	nuoE	C	Energy production and conversion	NADH dehydrogenase subunit E
2398750	2400750	1.43326	0.359951	2400077	2401879	nuoC	C	Energy production and conversion	NADH:ubiquinone oxidoreductase, chain C,D
4577375	4579375	1.43244	0.359379	4578091	4579485	hsdS	V	Defense mechanisms	specificity determinant for hsdM and hsdR
1524625	1525375	1.43199	0.359067	1524271	1524888	yncG	O	Posttranslational modification, protein turnover, chaperones	predicted enzyme
1524625	1525375	1.43199	0.359067	1524964	1525176	yncH	-	not classify	hypothetical protein
863250	864750	1.42842	0.356567	862865	863527	fsaA	-	not classify	fructose-6-phosphate aldolase 1
863250	864750	1.42842	0.356567	863603	864352	moeB	H	Coenzyme metabolism	molybdopterin biosynthesis protein MoeB
863250	864750	1.42842	0.356567	864352	865587	moeA	H	Coenzyme metabolism	molybdopterin biosynthesis protein
3458875	3461625	1.42832	0.356501	3457839	3459035	gspF	U	Intracellular trafficking, secretion,and vesicular transport	general secretory pathway component, cryptic
3458875	3461625	1.42832	0.356501	3459045	3459482	gspG	U	Intracellular trafficking, secretion,and vesicular transport	pseudopilin, cryptic, general secretion pathway
3458875	3461625	1.42832	0.356501	3459490	3459999	gspH	-	not classify	predicted general secretory pathway component, cryptic
3458875	3461625	1.42832	0.356501	3459996	3460373	gspI	U	Intracellular trafficking, secretion,and vesicular transport	general secretory pathway component, cryptic
3458875	3461625	1.42832	0.356501	3460366	3460953	gspJ	U	Intracellular trafficking, secretion,and vesicular transport	predicted general secretory pathway component, cryptic
3458875	3461625	1.42832	0.356501	3460946	3461929	gspK	U	Intracellular trafficking, secretion,and vesicular transport	general secretory pathway component, cryptic
2875625	2876375	1.42729	0.355778	2874603	2875640	iap	R	General function prediction only	aminopeptidase in alkaline phosphatase isozyme conversion
731125	733875	1.42654	0.35525	728806	732999	rhsC	M	Cell envelope biogenesis, outer membrane	rhsC element core protein RshC
731125	733875	1.42654	0.35525	732999	733325	ybfB	-	not classify	predicted inner membrane protein
731125	733875	1.42654	0.35525	733443	734876	ybfO	M	Cell envelope biogenesis, outer membrane	conserved protein, rhs-like
1559375	1561125	1.42533	0.354405	1558955	1560505	ddpA	E	Amino acid transport and metabolism	D-ala-D-a la transporter subunit
1559375	1561125	1.42533	0.354405	1560519	1561100	ddpX	M	Cell envelope biogenesis, outer membrane	D-ala-D-ala dipeptidase, Zn-dependent
4246000	4246500	1.42523	0.354336	4245994	4247334	lamB	-	not classify	maltoporin precursor
712125	715125	1.42425	0.353642	714635	715129	ybfP	-	not classify	hypothetical protein
2140125	2141625	1.42358	0.353175	2139658	2140239	dcd	F	Nucleotide transport and metabolism	deoxycytidine triphosphate deaminase
2140125	2141625	1.42358	0.353175	2140331	2140972	udk	F	Nucleotide transport and metabolism	uridine kinase
2140125	2141625	1.42358	0.353175	2141290	2144607	yegE	T	Signal transduction mechanism	predicted diguanylate cyclase, GGDEF domain signalling protein
1244750	1245500	1.41996	0.35063	1244383	1244823	ycgY	-	not classify	hypothetical protein
1244750	1245500	1.41996	0.35063	1244902	1246599	treA	G	Carbohydrate transport and metabolism	periplasmic trehalase
863125	864875	1.41892	0.349898	862865	863527	fsaA	-	not classify	fructose-6-phosphate aldolase 1
863125	864875	1.41892	0.349898	863603	864352	moeB	H	Coenzyme metabolism	molybdopterin biosynthesis protein MoeB
863125	864875	1.41892	0.349898	864352	865587	moeA	H	Coenzyme metabolism	molybdopterin biosynthesis protein
3510125	3510875	1.41849	0.349596	3509461	3510366	yhfZ	-	not classify	hypothetical protein
3510125	3510875	1.41849	0.349596	3510656	3511660	trpS	J	Translation, ribosomal structure and biogenesis	tryptophanyl-tRNA synthetase
3441125	3445625	1.41707	0.348593	3440788	3442119	prlA	U	Intracellular trafficking, secretion,and vesicular transport	protein translocase subunit SecY
3441125	3445625	1.41707	0.348593	3442127	3442561	rplO	J	Translation, ribosomal structure and biogenesis	50S ribosomal protein L15
3441125	3445625	1.41707	0.348593	3442565	3442744	rpmD	J	Translation, ribosomal structure and biogenesis	50S ribosomal protein L30
3441125	3445625	1.41707	0.348593	3442748	3443251	rpsE	J	Translation, ribosomal structure and biogenesis	30S ribosomal protein S5
3441125	3445625	1.41707	0.348593	3443266	3443619	rplR	J	Translation, ribosomal structure and biogenesis	50S ribosomal protein L18
3441125	3445625	1.41707	0.348593	3443629	3444162	rplF	J	Translation, ribosomal structure and biogenesis	50S ribosomal protein L6
3441125	3445625	1.41707	0.348593	3444175	3444567	rpsH	-	not classify	30S ribosomal protein S8
3441125	3445625	1.41707	0.348593	3444601	3444906	rpsN	J	Translation, ribosomal structure and biogenesis	30S ribosomal protein S14
3441125	3445625	1.41707	0.348593	3444921	3445460	rplE	J	Translation, ribosomal structure and biogenesis	50S ribosomal protein L5
3441125	3445625	1.41707	0.348593	3445475	3445789	rplX	J	Translation, ribosomal structure and biogenesis	50S ribosomal protein L24
3420125	3420875	1.41386	0.346321	3419347	3420450	yhdY	E	Amino acid transport and metabolism	predicted amino-acid transporter subunit
3420125	3420875	1.41386	0.346321	3420458	3421216	yhdZ	E	Amino acid transport and metabolism	predicted amino-acid transporter subunit
3335375	3336375	1.41277	0.345551	3335278	3335913	yrbC	Q	Secondary metabolites biosynthesis, transport and catabolism	predicted ABC-type organic solvent transporter
3335375	3336375	1.41277	0.345551	3335932	3336483	yrbD	Q	Secondary metabolites biosynthesis, transport and catabolism	predicted ABC-type organic solvent transporter
3510000	3513250	1.4121	0.345075	3509461	3510366	yhfZ	-	not classify	hypothetical protein
3510000	3513250	1.4121	0.345075	3510656	3511660	trpS	J	Translation, ribosomal structure and biogenesis	tryptophanyl-tRNA synthetase
3510000	3513250	1.4121	0.345075	3511653	3512411	gph	R	General function prediction only	phosphoglycolate phosphatase
3510000	3513250	1.4121	0.345075	3512404	3513081	rpe	G	Carbohydrate transport and metabolism	ribulose-phosphate 3-epimerase
3510000	3513250	1.4121	0.345075	3513099	3513935	dam	L	DNA replication, recombination and repair	DNA adenine methylase
3774375	3774875	1.41164	0.344751	3774194	3774403	yibT	-	not classify	hypothetical protein
3774375	3774875	1.41164	0.344751	3774688	3775050	yibL	-	not classify	hypothetical protein
0	1000	1.41142	0.344596	337	2799	thrA	E	Amino acid transport and metabolism	bifunctional aspartokinase I/homeserine dehydrogenase I
4639250	4640250	1.41142	0.344596	4638965	4639651	yjtD	J	Translation, ribosomal structure and biogenesis	predicted rRNA methyltransferase
444125	445375	1.41089	0.344224	443907	444398	yajQ	-	not classify	nucleotide-binding protein
444125	445375	1.41089	0.344224	444526	445890	yajR	-	not classify	predicted transporter
266000	268000	1.40971	0.343386	265334	266191	yafY	K	Transcription	CP4-6 prophage; predicted DNA-binding transcriptional regulator
266000	268000	1.40971	0.343386	266408	267229	yafZ	-	not classify	CP4-6 prophage; conserved protein
266000	268000	1.40971	0.343386	267321	268184	ykfA	R	General function prediction only	CP4-6 prophage; predicted GTP-binding protein
998375	1002625	1.40892	0.342824	997713	998414	ycbR	U	Intracellular trafficking, secretion,and vesicular transport	predicted periplasmic pilin chaperone
998375	1002625	1.40892	0.342824	998439	1001039	ycbS	U	Intracellular trafficking, secretion,and vesicular transport	predicted outer membrane usher protein
998375	1002625	1.40892	0.342824	1001030	1002100	ycbT	-	not classify	predicted fimbrial-like adhesin protein
998375	1002625	1.40892	0.342824	1002112	1002654	ycbU	U	Intracellular trafficking, secretion,and vesicular transport	predicted fimbrial-like adhesin protein
2088250	2089750	1.40433	0.33956	2088216	2089115	hisG	E	Amino acid transport and metabolism	ATP phosphoribosyltransferase
2088250	2089750	1.40433	0.33956	2089121	2090425	hisD	-	not classify	histidinol dehydrogenase
834500	835250	1.39869	0.335537	834471	835433	ybiB	E	Amino acid transport and metabolism	hypothetical protein
2477250	2478500	1.39738	0.334597	2477224	2478552	dsdA	E	Amino acid transport and metabolism	D-serine dehydratase
565750	566250	1.39679	0.334175	565674	565910	ybcD	-	not classify	DLP12 prophage; predicted replication protein fragment (pseudogene)
565750	566250	1.39679	0.334175	566056	566364	insE-3	-	not classify	DLP12 prophage; IS3 element protein InsE
760000	761250	1.39651	0.333977	757929	760730	sucA	C	Energy production and conversion	alpha-ketoglutarate decarboxylase
760000	761250	1.39651	0.333977	760745	761962	sucB	C	Energy production and conversion	dihydrolipoamide acetyltransferase
4569500	4574750	1.39622	0.333768	4568185	4569597	yjiR	E	Amino acid transport and metabolism	fused predicted DNA-binding transcriptional regulator/predicted aminotransferase
4569500	4574750	1.39622	0.333768	4569774	4569938	yjiS	-	not classify	hypothetical protein
4569500	4574750	1.39622	0.333768	4570437	4571954	yjiT	-	not classify	hypothetical protein
4569500	4574750	1.39622	0.333768	4572158	4574878	yjiV	R	General function prediction only	conserved protein (pseudogene)
1506750	1507500	1.39509	0.332961	1504805	1506766	ydcP	-	not classify	predicted peptidase
1506750	1507500	1.39509	0.332961	1506858	1507088	yncJ	-	not classify	hypothetical protein
1506750	1507500	1.39509	0.332961	1507310	1507486	yncN	-	not classify	hypothetical protein
3459875	3460625	1.39459	0.332602	3459490	3459999	gspH	-	not classify	predicted general secretory pathway component, cryptic
3459875	3460625	1.39459	0.332602	3459996	3460373	gspI	U	Intracellular trafficking, secretion,and vesicular transport	general secretory pathway component, cryptic
3459875	3460625	1.39459	0.332602	3460366	3460953	gspJ	U	Intracellular trafficking, secretion,and vesicular transport	predicted general secretory pathway component, cryptic
3615875	3617125	1.39295	0.331422	3615799	3616605	nikE	P	Inorganic ion transport and metabolism	nickel transporter subunit
3615875	3617125	1.39295	0.331422	3616611	3617012	nikR	K	Transcription	nickel responsive regulator
2181000	2182750	1.39155	0.33042	2180855	2181673	yegX	M	Cell envelope biogenesis, outer membrane	predicted hydrolase
2181000	2182750	1.39155	0.33042	2181738	2182538	thiD	H	Coenzyme metabolism	phosphomethylpyrimidine kinase
2181000	2182750	1.39155	0.33042	2182535	2183323	thiM	H	Coenzyme metabolism	hydroxyethylthiazole kinase
1158375	1159625	1.3902	0.329445	1157092	1158525	ptsG	G	Carbohydrate transport and metabolism	fused glucose-specific PTS enzymes: IIB component/IIC component
1158375	1159625	1.3902	0.329445	1158585	1160774	fhuE	P	Inorganic ion transport and metabolism	ferric-rhodotorulic acid outer membrane transporter
2776500	2779000	1.3899	0.32923	2776168	2780748	ypjA	U	Intracellular trafficking, secretion,and vesicular transport	adhesin-like autotransporter
2078750	2079500	1.38689	0.327067	2079405	2080571	dacD	M	Cell envelope biogenesis, outer membrane	D-alanyl-D-alanine carboxypeptidase (penicillin-binding protein 6b)
751625	752125	1.38592	0.326366	751452	752018	ybgD	U	Intracellular trafficking, secretion,and vesicular transport	predicted fimbrial-like adhesin protein
3615750	3618500	1.38283	0.32413	3615038	3615802	nikD	P	Inorganic ion transport and metabolism	nickel transporter subunit
3615750	3618500	1.38283	0.32413	3615799	3616605	nikE	P	Inorganic ion transport and metabolism	nickel transporter subunit
3615750	3618500	1.38283	0.32413	3616611	3617012	nikR	K	Transcription	nickel responsive regulator
3615750	3618500	1.38283	0.32413	3617215	3621450	rhsB	M	Cell envelope biogenesis, outer membrane	rhsB element core protein RshB
3740625	3741125	1.37687	0.319813	3740756	3741754	yiaK	-	not classify	2,3-diketo-L-gulonate dehydrogenase, NADH-dependent
3547000	3548250	1.37269	0.316773	3546008	3548092	malQ	-	not classify	4-alpha-glucanotransferase (amylomaltase)
3547000	3548250	1.37269	0.316773	3548102	3550495	malP	G	Carbohydrate transport and metabolism	maltodextrin phosphorylase
2928500	2930750	1.37053	0.315196	2927598	2928965	sdaB	E	Amino acid transport and metabolism	L-serine deaminase II
2928500	2930750	1.37053	0.315196	2928987	2929832	xni	L	DNA replication, recombination and repair	exonuclease IX
2928500	2930750	1.37053	0.315196	2929887	2931038	fucO	C	Energy production and conversion	L-1,2-propanediol oxidoreductase
1935375	1937125	1.36623	0.312056	1934676	1935545	yebK	K	Transcription	predicted DNA-binding transcriptional regulator
1935375	1937125	1.36623	0.312056	1935673	1937115	pykA	-	not classify	pyruvate kinase
870250	870750	1.36568	0.311653	870190	871110	yliC	P	Inorganic ion transport and metabolism	predicted peptide transporter subunit: membrane component of ABC superfamily
2621250	2623250	1.36103	0.308239	2621066	2623132	ppk	-	not classify	polyphosphate kinase
2621250	2623250	1.36103	0.308239	2623137	2624678	ppx	P	Inorganic ion transport and metabolism	exopolyphosphatase
335000	335500	1.35944	0.30707	334504	335109	yahD	R	General function prediction only	predicted transcriptional regulator with ankyrin domain
335000	335500	1.35944	0.30707	335149	336012	yahE	-	not classify	hypothetical protein
3860125	3862375	1.35882	0.306615	3860010	3860495	glvB	G	Carbohydrate transport and metabolism	arbutin specific enzyme IIB component of PTS
3860125	3862375	1.35882	0.306615	3860520	3861626	glvC	G	Carbohydrate transport and metabolism	arbutin specific enzyme IIC component of PTS
3860125	3862375	1.35882	0.306615	3861922	3862638	yidP	K	Transcription	predicted DNA-binding transcriptional regulator
2841250	2843250	1.35777	0.305844	2841058	2841468	hycH	-	not classify	protein required for maturation of hydrogenase 3
2841250	2843250	1.35777	0.305844	2841465	2842232	hycG	C	Energy production and conversion	hydrogenase 3 and formate hydrogenase complex, HycG subunit
2841250	2843250	1.35777	0.305844	2842232	2842774	hycF	C	Energy production and conversion	formate hydrogenlyase complex iron-sulfur protein
2841250	2843250	1.35777	0.305844	2842784	2844493	hycE	C	Energy production and conversion	hydrogenase 3, large subunit
2941000	2943000	1.35608	0.304598	2940940	2941167	ygdI	-	not classify	hypothetical protein
2941000	2943000	1.35608	0.304598	2941359	2942564	csdA	E	Amino acid transport and metabolism	cysteine sulfinate desulfinase
2941000	2943000	1.35608	0.304598	2942564	2943007	ygdK	R	General function prediction only	predicted Fe-S metabolism protein
1576250	1577500	1.35463	0.303529	1575681	1577366	yddA	R	General function prediction only	fused predicted multidrug transporter subunits of ABC superfamily: membrane component/ATP-binding component
3875625	3877625	1.35092	0.300784	3875728	3878142	gyrB	L	DNA replication, recombination and repair	DNA gyrase subunit B
533875	535375	1.35007	0.300155	533140	534921	gcl	R	General function prediction only	glyoxylate carboligase
533875	535375	1.35007	0.300155	534934	535710	hyi	G	Carbohydrate transport and metabolism	hydroxypyruvate isomerase
2151750	2161000	1.34849	0.298983	2160900	2162303	baeS	T	Signal transduction mechanism	sensory histidine kinase in two-component regulatory system with BaeR
1465625	1467875	1.34846	0.298963	1467382	1468533	insI-2	L	DNA replication, recombination and repair	IS30 transposase
2626250	2627250	1.34698	0.297861	2624717	2626960	yfgF	T	Signal transduction mechanism	predicted inner membrane protein
4246000	4246750	1.34672	0.297672	4245994	4247334	lamB	-	not classify	maltoporin precursor
820375	821875	1.34379	0.295492	820016	820729	ybhM	R	General function prediction only	conserved inner membrane protein
820375	821875	1.34379	0.295492	820765	821721	ybhN	S	Function unknown	conserved inner membrane protein
820375	821875	1.34379	0.295492	821721	822962	ybhO	I	Lipid metabolism	cardiolipin synthase 2
3369750	3371000	1.34351	0.295287	3369106	3370596	nanT	-	not classify	sialic acid transporter
3369750	3371000	1.34351	0.295287	3370705	3371598	nanA	M	Cell envelope biogenesis, outer membrane	N-acetylneuraminate lyase
4448500	4450250	1.34045	0.293003	4447985	4448941	ytfQ	G	Carbohydrate transport and metabolism	predicted sugar transporter subunit: periplasmic-binding component of ABC superfamily
4448500	4450250	1.34045	0.293003	4449081	4450583	ytfR	G	Carbohydrate transport and metabolism	predicted sugar transporter subunit: ATP-binding component of ABC superfamily
1419625	1421125	1.33844	0.291504	1419143	1420000	ydaU	S	Function unknown	Rac prophage; conserved protein
1419625	1421125	1.33844	0.291504	1420007	1420753	ydaV	L	DNA replication, recombination and repair	Rac prophage; predicted DNA replication protein
1419625	1421125	1.33844	0.291504	1420776	1421336	ydaW	-	not classify	Rac prophage; predicted DNA-binding protein
465750	468250	1.33787	0.291078	464836	466536	ybaE	R	General function prediction only	predicted transporter subunit: periplasmic-binding component of ABC superfamily
465750	468250	1.33787	0.291078	466636	467454	cof	R	General function prediction only	thiamin pyrimidine pyrophosphate hydrolase
465750	468250	1.33787	0.291078	467607	468065	ybaO	K	Transcription	predicted DNA-binding transcriptional regulator
465750	468250	1.33787	0.291078	468095	469867	mdlA	V	Defense mechanisms	fused predicted multidrug transporter subunits of ABC superfamily: ATP-binding components
1119000	1120500	1.33717	0.290553	1118691	1119809	solA	E	Amino acid transport and metabolism	N-methyltryptophan oxidase, FAD-binding
1119000	1120500	1.33717	0.290553	1119924	1120178	yceP	-	not classify	hypothetical protein
1119000	1120500	1.33717	0.290553	1120465	1120710	dinI	-	not classify	DNA damage-inducible protein I
1570375	1572875	1.33693	0.290376	1570431	1573226	pqqL	R	General function prediction only	predicted peptidase
4333875	4334625	1.33579	0.28952	4333717	4335054	adiC	E	Amino acid transport and metabolism	arginine:agmatin
4281000	4283500	1.33511	0.289013	4279806	4281098	yjcF	S	Function unknown	hypothetical protein
4281000	4283500	1.33511	0.289013	4281276	4282925	actP	R	General function prediction only	acetate permease
4281000	4283500	1.33511	0.289013	4282922	4283236	yjcH	-	not classify	conserved inner membrane protein involved in acetate transport
4281000	4283500	1.33511	0.289013	4283436	4285394	acs	I	Lipid metabolism	acetyl-coenzyme A synthetase
4399875	4400625	1.335	0.288929	4398695	4399975	hflX	R	General function prediction only	predicted GTPase
4399875	4400625	1.335	0.288929	4400061	4401320	hflK	O	Posttranslational modification, protein turnover, chaperones	modulator for HflB protease specific for phage lambda cII repressor
1849375	1850375	1.33495	0.288891	1848884	1849900	ansA	-	not classify	cytoplasmic asparaginase I
1849375	1850375	1.33495	0.288891	1849911	1850552	pncA	Q	Secondary metabolites biosynthesis, transport and catabolism	nicotinamidase/pyrazinamidase
2795375	2795875	1.33373	0.287981	2795233	2795532	ygaV	K	Transcription	predicted DNA-binding transcriptional regulator
2795375	2795875	1.33373	0.287981	2795542	2796066	ygaP	P	Inorganic ion transport and metabolism	predicted inner membrane protein with hydrolase activity
3195250	3199250	1.33302	0.287445	3194823	3197663	glnE	T	Signal transduction mechanism	fused deadenylyltransferase/adenylyltransferase for glutamine synthetase
3195250	3199250	1.33302	0.287445	3197686	3198987	ygiF	S	Function unknown	predicted adenylate cyclase
3195250	3199250	1.33302	0.287445	3199229	3199849	htrG	T	Signal transduction mechanism	predicted signal transduction protein (SH3 domain)
85875	87375	1.33255	0.287091	85630	87354	ilvI	H	Coenzyme metabolism	acetolactate synthase III large subunit
85875	87375	1.33255	0.287091	87357	87848	ilvH	E	Amino acid transport and metabolism	acetolactate synthase small subunit
2703875	2705125	1.33032	0.28542	2703347	2705146	lepA	M	Cell envelope biogenesis, outer membrane	GTP-binding protein LepA
4516375	4518125	1.32854	0.284081	4517361	4518347	yjhU	K	Transcription	KpLE2 phage-like element; predicted DNA-binding transcriptional regulator
1426375	1428375	1.32747	0.283278	1425770	1426750	insH-5	L	DNA replication, recombination and repair	Rac prophage; IS5 transposase and trans-activator
1426375	1428375	1.32747	0.283278	1426838	1427008	lomR_2	M	Cell envelope biogenesis, outer membrane	Rac prophage; predicted protein, C-ter fragment (pseudogene)
1426375	1428375	1.32747	0.283278	1427073	1430435	stfR	-	not classify	Rac prophage; predicted tail fiber protein
2934375	2935375	1.32742	0.283235	2933606	2935381	fucI	G	Carbohydrate transport and metabolism	L-fucose isomerase
2615875	2616625	1.32718	0.283054	2615600	2615959	yfgD	P	Inorganic ion transport and metabolism	predicted oxidoreductase
2615875	2616625	1.32718	0.283054	2616097	2616843	hda	L	DNA replication, recombination and repair	DNA replication initiation factor
1279250	1281000	1.32493	0.281362	1279087	1282830	narG	C	Energy production and conversion	nitrate reductase 1, alpha subunit
3115375	3119625	1.3234	0.280204	3112572	3117134	yghJ	-	not classify	predicted inner membrane lipoprotein
3115375	3119625	1.3234	0.280204	3117619	3119301	yghK	C	Energy production and conversion	glycolate transporter
3020500	3021000	1.32201	0.279152	3019338	3022208	xdhD	C	Energy production and conversion	fused predicted xanthine/hypoxanthine oxidase: molybdopterin-binding subunit/Fe-S binding subunit
2181125	2182625	1.32096	0.278358	2180855	2181673	yegX	M	Cell envelope biogenesis, outer membrane	predicted hydrolase
2181125	2182625	1.32096	0.278358	2181738	2182538	thiD	H	Coenzyme metabolism	phosphomethylpyrimidine kinase
2181125	2182625	1.32096	0.278358	2182535	2183323	thiM	H	Coenzyme metabolism	hydroxyethylthiazole kinase
2379375	2381125	1.32006	0.277676	2379104	2379565	elaA	R	General function prediction only	predicted acyltransferase with acyl-CoA N-acyltransferase domain
2379375	2381125	1.32006	0.277676	2379630	2380547	elaC	R	General function prediction only	ribonuclease Z
2379375	2381125	1.32006	0.277676	2380735	2381946	elaD	-	not classify	predicted enzyme
4489000	4492500	1.31901	0.276885	4488164	4489162	idnR	K	Transcription	DNA-binding transcriptional repressor, 5-gluconate-binding
4489000	4492500	1.31901	0.276885	4489229	4490548	idnT	E	Amino acid transport and metabolism	L-idonate and D-gluconate transporter
4489000	4492500	1.31901	0.276885	4490610	4491374	idnO	R	General function prediction only	gluconate 5-dehydrogenase
4489000	4492500	1.31901	0.276885	4491398	4492429	idnD	R	General function prediction only	L-idonate 5-dehydrogenase, NAD-binding
51250	53000	1.31757	0.275789	51229	51606	apaG	-	not classify	hypothetical protein
51250	53000	1.31757	0.275789	51609	52430	ksgA	J	Translation, ribosomal structure and biogenesis	dimethyladenosine transferase
51250	53000	1.31757	0.275789	52427	53416	pdxA	-	not classify	4-hydroxythreonine-4-phosphate dehydrogenase
2315750	2320000	1.31728	0.275569	2315049	2317850	rcsC	T	Signal transduction mechanism	hybrid sensory kinase in two-component regulatory system with RcsB and YojN
2315750	2320000	1.31728	0.275569	2318065	2319891	atoS	T	Signal transduction mechanism	sensory histidine kinase in two-component regulatory system with AtoC
2315750	2320000	1.31728	0.275569	2319888	2321273	atoC	T	Signal transduction mechanism	fused response regulator of ato operon, in two-component system with AtoS: response regulator/sigma54 interaction protein
618500	619000	1.31703	0.275382	617477	618610	fepE	M	Cell envelope biogenesis, outer membrane	regulator of length of O-antigen component of lipopolysaccharide chains
618500	619000	1.31703	0.275382	618607	619422	fepC	H	Coenzyme metabolism	iron-enterobactin transporter subunit
687625	688625	1.31695	0.275318	687220	688236	insH-3	L	DNA replication, recombination and repair	IS5 transposase and trans-activator
687625	688625	1.31695	0.275318	688566	690104	lnt	M	Cell envelope biogenesis, outer membrane	apolipoprotein N-acyltransferase
2465000	2465500	1.31348	0.272682	2464567	2465724	intS	L	DNA replication, recombination and repair	CPS-53 (KpLE1) prophage; predicted prophage CPS-53 integrase
2841125	2843375	1.30623	0.267146	2841058	2841468	hycH	-	not classify	protein required for maturation of hydrogenase 3
2841125	2843375	1.30623	0.267146	2841465	2842232	hycG	C	Energy production and conversion	hydrogenase 3 and formate hydrogenase complex, HycG subunit
2841125	2843375	1.30623	0.267146	2842232	2842774	hycF	C	Energy production and conversion	formate hydrogenlyase complex iron-sulfur protein
2841125	2843375	1.30623	0.267146	2842784	2844493	hycE	C	Energy production and conversion	hydrogenase 3, large subunit
2168875	2170625	1.30393	0.265383	2168556	2169422	insF-5	L	DNA replication, recombination and repair	IS3 element protein InsF
2168875	2170625	1.30393	0.265383	2169857	2170897	gatD	R	General function prediction only	galactitol-1-phosphate dehydrogenase, Zn-dependent and NAD(P)-binding
4053500	4054750	1.30382	0.265299	4053313	4054362	glnL	T	Signal transduction mechanism	sensory histidine kinase in two-component regulatory system with GlnG
4053500	4054750	1.30382	0.265299	4054648	4056057	glnA	-	not classify	glutamine synthetase
2063750	2064500	1.30297	0.264645	2063243	2063788	cobU	H	Coenzyme metabolism	adenosylcobinamide kinase/adenosylcobinamide-phosphate guanylyltransferase
2063750	2064500	1.30297	0.264645	2064329	2065345	insH-6	L	DNA replication, recombination and repair	CP4-44 prophage; IS5 transposase and trans-activator
3505875	3506875	1.29725	0.260247	3505734	3506612	php	R	General function prediction only	predicted hydrolase
3505875	3506875	1.29725	0.260247	3506609	3507835	yhfW	G	Carbohydrate transport and metabolism	predicted mutase
3987875	3988875	1.29665	0.259783	3987848	3988789	hemC	-	not classify	porphobilinogen deaminase
1543875	1544625	1.29533	0.258763	1543762	1544052	yddL	M	Cell envelope biogenesis, outer membrane	predicted lipoprotein
1543875	1544625	1.29533	0.258763	1544312	1545136	yddG	-	not classify	predicted methyl viologen efflux pump
2339875	2343125	1.29217	0.256325	2338439	2342191	yfaL	U	Intracellular trafficking, secretion,and vesicular transport	adhesin
2339875	2343125	1.29217	0.256325	2342887	2345172	nrdA	F	Nucleotide transport and metabolism	ribonucleotide-diphosphate reductase alpha subunit
4477125	4478875	1.28986	0.254533	4477057	4477560	yjgM	-	not classify	predicted acetyltransferase
4477125	4478875	1.28986	0.254533	4477753	4478949	yjgN	-	not classify	conserved inner membrane protein
266500	267250	1.28969	0.254403	266408	267229	yafZ	-	not classify	CP4-6 prophage; conserved protein
2037375	2039625	1.28843	0.253421	2036980	2037393	yedX	-	not classify	hypothetical protein
2037375	2039625	1.28843	0.253421	2037502	2038506	yedY	R	General function prediction only	hypothetical protein
2037375	2039625	1.28843	0.253421	2038507	2039142	yedZ	S	Function unknown	hypothetical protein
2037375	2039625	1.28843	0.253421	2039399	2040049	yodA	R	General function prediction only	conserved metal-binding protein
4012625	4013125	1.28532	0.251005	4011076	4013337	metE	E	Amino acid transport and metabolism	5-methyltetrahydropteroyltriglutamate--homocysteine methyltransferase
1060875	1061625	1.28059	0.247319	1058479	1061025	torA	C	Energy production and conversion	trimethylamine N-oxide (TMAO) reductase I, catalytic subunit
1060875	1061625	1.28059	0.247319	1061022	1061621	torD	R	General function prediction only	chaperone protein TorD
3740000	3741500	1.27994	0.246811	3739707	3740555	yiaJ	K	Transcription	predicted DNA-binding transcriptional repressor
3740000	3741500	1.27994	0.246811	3740756	3741754	yiaK	-	not classify	2,3-diketo-L-gulonate dehydrogenase, NADH-dependent
2701125	2701875	1.27945	0.246431	2700503	2701408	era	R	General function prediction only	GTP-binding protein Era
2701125	2701875	1.27945	0.246431	2701405	2702085	rncS	K	Transcription	ribonuclease III
260000	261750	1.27446	0.242526	259612	260715	proB	E	Amino acid transport and metabolism	gamma-glutamyl kinase
260000	261750	1.27446	0.242526	260727	261980	proA	E	Amino acid transport and metabolism	gamma-glutamyl phosphate reductase
4277875	4279375	1.26929	0.238457	4278003	4279652	yjcE	P	Inorganic ion transport and metabolism	predicted cation/proton antiporter
2029500	2030500	1.26727	0.236862	2028923	2030341	dcm	L	DNA replication, recombination and repair	DNA cytosine methylase
2029500	2030500	1.26727	0.236862	2030408	2031103	yedJ	R	General function prediction only	predicted phosphohydrolase
2975500	2976250	1.2671	0.236734	2974621	2975652	galR	K	Transcription	DNA-binding transcriptional repressor
2975500	2976250	1.2671	0.236734	2975659	2976921	lysA	E	Amino acid transport and metabolism	diaminopimelate decarboxylase, PLP-binding
1133125	1133625	1.26522	0.235245	1133025	1133780	flgF	N	Cell motility and secretion	flagellar component of cell-proximal portion of basal-body rod
3460125	3460625	1.25956	0.230761	3459996	3460373	gspI	U	Intracellular trafficking, secretion,and vesicular transport	general secretory pathway component, cryptic
3460125	3460625	1.25956	0.230761	3460366	3460953	gspJ	U	Intracellular trafficking, secretion,and vesicular transport	predicted general secretory pathway component, cryptic
807500	808000	1.25945	0.230677	807191	808480	bioA	H	Coenzyme metabolism	adenosylmethionine--8-amino-7-oxononanoate transaminase
2362125	2362875	1.25939	0.230625	2361755	2362297	yfaZ	-	not classify	predicted outer membrane porin protein
2362125	2362875	1.25939	0.230625	2362576	2363001	yfaO	-	not classify	predicted NUDIX hydrolase
1082000	1082750	1.25534	0.227405	1081466	1082593	ycdO	P	Inorganic ion transport and metabolism	hypothetical protein
1082000	1082750	1.25534	0.227405	1082599	1083870	ycdB	P	Inorganic ion transport and metabolism	hypothetical protein
2375250	2376000	1.2507	0.223702	2374856	2375614	yfbB	R	General function prediction only	predicted peptidase
2375250	2376000	1.2507	0.223702	2375611	2377281	menD	H	Coenzyme metabolism	2-succinyl-6-hydroxy-2,4-cyclohexadiene-1-carboxylate synthase
4092750	4094000	1.24967	0.222882	4092746	4094005	rhaA	-	not classify	L-rhamnose isomerase
961625	962875	1.24734	0.22101	961218	962891	rpsA	J	Translation, ribosomal structure and biogenesis	30S ribosomal protein S1
3254750	3256000	1.24678	0.220563	3254701	3255969	yhaO	E	Amino acid transport and metabolism	predicted transporter
1419500	1421250	1.24189	0.21663	1419143	1420000	ydaU	S	Function unknown	Rac prophage; conserved protein
1419500	1421250	1.24189	0.21663	1420007	1420753	ydaV	L	DNA replication, recombination and repair	Rac prophage; predicted DNA replication protein
1419500	1421250	1.24189	0.21663	1420776	1421336	ydaW	-	not classify	Rac prophage; predicted DNA-binding protein
2181000	2183000	1.2402	0.215271	2180855	2181673	yegX	M	Cell envelope biogenesis, outer membrane	predicted hydrolase
2181000	2183000	1.2402	0.215271	2181738	2182538	thiD	H	Coenzyme metabolism	phosphomethylpyrimidine kinase
2181000	2183000	1.2402	0.215271	2182535	2183323	thiM	H	Coenzyme metabolism	hydroxyethylthiazole kinase
3290875	3292125	1.23925	0.214503	3290497	3291357	yraL	R	General function prediction only	predicted methyltransferase
3290875	3292125	1.23925	0.214503	3291422	3293458	yraM	R	General function prediction only	hypothetical protein
4197125	4198875	1.23776	0.213304	4196813	4197484	nfi	L	DNA replication, recombination and repair	endonuclease V
4197125	4198875	1.23776	0.213304	4197527	4198117	yjaG	-	not classify	hypothetical protein
4197125	4198875	1.23776	0.213304	4198304	4198576	hupA	-	not classify	HU, DNA-binding transcriptional regulator, alpha subunit
4197125	4198875	1.23776	0.213304	4198589	4199284	yjaH	-	not classify	hypothetical protein
1973625	1975625	1.23635	0.212162	1973353	1974279	motB	N	Cell motility and secretion	flagellar motor protein MotB
1973625	1975625	1.23635	0.212162	1974276	1975163	motA	N	Cell motility and secretion	flagellar motor protein MotA
1973625	1975625	1.23635	0.212162	1975290	1975868	flhC	-	not classify	DNA-binding transcriptional dual regulator with FlhD
2309125	2311125	1.23467	0.210808	2308501	2309556	yojL	-	not classify	predicted thiamine biosynthesis lipoprotein
2309125	2311125	1.23467	0.210808	2309668	2310771	ompC	M	Cell envelope biogenesis, outer membrane	outer membrane porin protein C
2829250	2832000	1.23306	0.209502	2828797	2830311	ygaA	T	Signal transduction mechanism	anaerobic nitric oxide reductase transcription regulator
2829250	2832000	1.23306	0.209502	2830498	2831937	norV	C	Energy production and conversion	anaerobic nitric oxide reductase flavorubredoxin
2829250	2832000	1.23306	0.209502	2831934	2833067	ygbD	R	General function prediction only	nitric oxide reductase
2770500	2771500	1.23041	0.207346	2770189	2770707	ypjL	P	Inorganic ion transport and metabolism	CP4-57 prophage; predicted inner membrane protein
2770500	2771500	1.23041	0.207346	2770858	2771058	yfjV	P	Inorganic ion transport and metabolism	CP4-57 prophage; predicted protein
2770500	2771500	1.23041	0.207346	2770998	2771180	ypjM	-	not classify	CP4-57 prophage; predicted protein (pseudogene)
2770500	2771500	1.23041	0.207346	2771340	2773043	yfjW	-	not classify	CP4-57 prophage; predicted inner membrane protein
2813375	2817875	1.22944	0.206558	2812905	2814461	gshA	H	Coenzyme metabolism	glutamate--cysteine ligase
2813375	2817875	1.22944	0.206558	2814534	2814962	yqaA	S	Function unknown	conserved inner membrane protein
2813375	2817875	1.22944	0.206558	2814959	2815525	yqaB	R	General function prediction only	predicted hydrolase
2813375	2817875	1.22944	0.206558	2816983	2817168	csrA	-	not classify	carbon storage regulator
2813375	2817875	1.22944	0.206558	2817403	2820033	alaS	J	Translation, ribosomal structure and biogenesis	alanyl-tRNA synthetase
4526875	4528125	1.22764	0.205093	4526134	4526940	sgcQ	R	General function prediction only	KpLE2 phage-like element; predicted nucleoside triphosphatase
4526875	4528125	1.22764	0.205093	4526953	4528266	sgcC	G	Carbohydrate transport and metabolism	KpLE2 phage-like element; predicted phosphotransferase enzyme IIC component
1068250	1070500	1.22624	0.203956	1067734	1069062	ycdG	F	Nucleotide transport and metabolism	predicted transporter
1068250	1070500	1.22624	0.203956	1069083	1069577	ycdH	R	General function prediction only	predicted oxidoreductase, flavin:NADH component
1068250	1070500	1.22624	0.203956	1069588	1070178	ycdI	C	Energy production and conversion	hypothetical protein
1068250	1070500	1.22624	0.203956	1070188	1070988	rarA	R	General function prediction only	predicted hydrolase
106000	106500	1.22564	0.203466	105305	106456	ftsZ	D	Cell division and chromosome partitioning	cell division protein FtsZ
4619875	4622875	1.22465	0.202653	4619792	4621123	yjjJ	R	General function prediction only	predicted DNA-binding transcriptional regulator
4619875	4622875	1.22465	0.202653	4621124	4622140	lplA	H	Coenzyme metabolism	lipoate-protein ligase A
4619875	4622875	1.22465	0.202653	4622168	4622812	ytjB	-	not classify	hypothetical protein
358750	360000	1.22436	0.202421	358713	359183	cynS	P	Inorganic ion transport and metabolism	cyanate hydratase
358750	360000	1.22436	0.202421	359216	360370	cynX	P	Inorganic ion transport and metabolism	predicted cyanate transporter
1987250	1988500	1.22156	0.200128	1987705	1988916	tyrP	E	Amino acid transport and metabolism	tyrosine transporter
3307250	3309000	1.2195	0.198438	3307055	3309259	pnp	J	Translation, ribosomal structure and biogenesis	polynucleotide phosphorylase/polyadenylase
358750	360250	1.21729	0.196624	358713	359183	cynS	P	Inorganic ion transport and metabolism	cyanate hydratase
358750	360250	1.21729	0.196624	359216	360370	cynX	P	Inorganic ion transport and metabolism	predicted cyanate transporter
2236375	2237875	1.21592	0.195502	2235791	2237311	mglA	G	Carbohydrate transport and metabolism	fused methyl-galactoside transporter subunits of ABC superfamily: ATP-binding components
2236375	2237875	1.21592	0.195502	2237372	2238370	mglB	G	Carbohydrate transport and metabolism	methyl-galactoside transporter subunit
1995500	1998000	1.2146	0.194411	1995086	1995838	yecC	E	Amino acid transport and metabolism	predicted transporter subunit: ATP-binding component of ABC superfamily
1995500	1998000	1.2146	0.194411	1995835	1996503	yecS	E	Amino acid transport and metabolism	predicted transporter subunit: membrane component of ABC superfamily
1995500	1998000	1.2146	0.194411	1996518	1997504	yedO	E	Amino acid transport and metabolism	D-cysteine desulfhydrase
1995500	1998000	1.2146	0.194411	1997609	1998409	fliY	T	Signal transduction mechanism	cystine transporter subunit
1690375	1691625	1.21335	0.193384	1689610	1690875	uidC	-	not classify	predicted outer membrane porin protein
1690375	1691625	1.21335	0.193384	1690914	1692287	uidB	G	Carbohydrate transport and metabolism	glucuronide transporter
2876375	2878375	1.21239	0.192595	2877810	2878409	ygcH	-	not classify	hypothetical protein
4298875	4300875	1.20972	0.190393	4297587	4299053	yjcP	U	Intracellular trafficking, secretion,and vesicular transport	predicted outer membrane factor of efflux pump
4298875	4300875	1.20972	0.190393	4299050	4301101	yjcQ	S	Function unknown	predicted multidrug efflux system component
1880500	1881000	1.20807	0.189027	1879936	1881021	yeaU	E	Amino acid transport and metabolism	predicted dehydrogenase
3080000	3081000	1.20755	0.188591	3079935	3080693	yggG	O	Posttranslational modification, protein turnover, chaperones	predicted peptidase
3080000	3081000	1.20755	0.188591	3080899	3081819	speB	E	Amino acid transport and metabolism	agmatinase
3072375	3077375	1.2071	0.188218	3071998	3072711	yggC	H	Coenzyme metabolism	hypothetical protein
3072375	3077375	1.2071	0.188218	3072708	3073217	yggD	-	not classify	predicted DNA-binding transcriptional regulator
3072375	3077375	1.2071	0.188218	3073239	3074204	yggF	-	not classify	predicted hexoseP phosphatase
3072375	3077375	1.2071	0.188218	3074201	3075478	yggP	R	General function prediction only	predicted dehydrogenase
3072375	3077375	1.2071	0.188218	3075493	3076881	cmtA	G	Carbohydrate transport and metabolism	predicted fused mannitol-specific PTS enzymes: IIB component/IIC component
3072375	3077375	1.2071	0.188218	3076909	3077352	cmtB	T	Signal transduction mechanism	predicted mannitol-specific enzyme IIA component of PTS
2355625	2356375	1.20619	0.18747	2354926	2355825	yfaD	S	Function unknown	hypothetical protein
2355625	2356375	1.20619	0.18747	2356064	2356867	yfaU	G	Carbohydrate transport and metabolism	predicted 2,4-dihydroxyhept-2-ene-1,7-dioic acid aldolase
4403625	4406125	1.20344	0.185188	4402710	4404008	purA	-	not classify	adenylosuccinate synthetase
4403625	4406125	1.20344	0.185188	4404213	4404638	yjeB	K	Transcription	predicted DNA-binding transcriptional regulator
4403625	4406125	1.20344	0.185188	4404677	4407118	rnr	K	Transcription	exoribonuclease R, RNase R
1138125	1139375	1.20168	0.183719	1137601	1139244	flgK	N	Cell motility and secretion	flagellar hook-associated protein K
1138125	1139375	1.20168	0.183719	1139256	1140209	flgL	N	Cell motility and secretion	flagellar hook-associated protein L
2360375	2360875	1.20132	0.183423	2360453	2361655	yfaY	R	General function prediction only	competence damage-inducible protein A
2543000	2545000	1.20078	0.182971	2542774	2543631	yfeT	K	Transcription	predicted DNA-binding transcriptional regulator
2543000	2545000	1.20078	0.182971	2543795	2544691	yfeU	R	General function prediction only	N-acetylmuramic acid-6-phosphate etherase
2543000	2545000	1.20078	0.182971	2544695	2546119	yfeV	G	Carbohydrate transport and metabolism	N-acetylmuramic acid phosphotransfer permease
3111625	3112625	1.19954	0.181935	3111565	3112374	pppA	U	Intracellular trafficking, secretion,and vesicular transport	bifunctional prepilin leader peptidase/ methylase
3111625	3112625	1.19954	0.181935	3112572	3117134	yghJ	-	not classify	predicted inner membrane lipoprotein
149000	150250	1.19851	0.181079	148807	149601	panB	H	Coenzyme metabolism	3-methyl-2-oxobutanoate hydroxymethyltransferase
149000	150250	1.19851	0.181079	149715	150953	yadC	-	not classify	predicted fimbrial-like adhesin protein
2769625	2770375	1.19846	0.181036	2769170	2769637	yfjT	-	not classify	CP4-57 prophage; predicted protein
2769625	2770375	1.19846	0.181036	2769862	2770176	yfjU	P	Inorganic ion transport and metabolism	CP4-57 prophage; conserved protein
2769625	2770375	1.19846	0.181036	2770189	2770707	ypjL	P	Inorganic ion transport and metabolism	CP4-57 prophage; predicted inner membrane protein
4479625	4482125	1.19675	0.179606	4479005	4481860	valS	J	Translation, ribosomal structure and biogenesis	valyl-tRNA synthetase
4479625	4482125	1.19675	0.179606	4481860	4482303	holC	-	not classify	DNA polymerase III subunit chi
1596625	1597125	1.1948	0.177982	1596641	1598233	lsrK	G	Carbohydrate transport and metabolism	autoinducer-2 (AI-2) kinase
1949875	1950375	1.1945	0.177725	1949419	1950237	yecE	-	not classify	hypothetical protein
1949875	1950375	1.1945	0.177725	1950290	1950685	yecN	R	General function prediction only	predicted inner membrane protein
4035750	4040750	1.19417	0.177454	4040438	4041424	yihE	R	General function prediction only	predicted kinase
4326625	4328125	1.19309	0.176545	4325158	4327386	yjdA	-	not classify	conserved protein with nucleoside triphosphate hydrolase domain
4326625	4328125	1.19309	0.176545	4327383	4328261	yjcZ	-	not classify	hypothetical protein
2799250	2802250	1.19069	0.174533	2798987	2799397	nrdI	F	Nucleotide transport and metabolism	hypothetical protein
2799250	2802250	1.19069	0.174533	2799370	2801514	nrdE	F	Nucleotide transport and metabolism	ribonucleotide-diphosphate reductase alpha subunit
2799250	2802250	1.19069	0.174533	2801524	2802483	nrdF	F	Nucleotide transport and metabolism	ribonucleotide-diphosphate reductase beta subunit
4205250	4205750	1.18671	0.171182	4203966	4205555	purH	-	not classify	bifunctional phosphoribosylaminoimidazolecarboxamide formyltransferase/IMP cyclohydrolase
189375	189875	1.18603	0.170613	188712	189506	map	J	Translation, ribosomal structure and biogenesis	methionine aminopeptidase
189375	189875	1.18603	0.170613	189874	190599	rpsB	-	not classify	30S ribosomal protein S2
780875	783125	1.1851	0.169825	783105	784046	ybgR	P	Inorganic ion transport and metabolism	zinc transporter ZitB
3724625	3725125	1.18292	0.16799	3723910	3724905	yiaH	S	Function unknown	conserved inner membrane protein
3724625	3725125	1.18292	0.16799	3724947	3725384	yiaA	S	Function unknown	conserved inner membrane protein
3417000	3417500	1.18203	0.167229	3417171	3418088	yhdW	T	Signal transduction mechanism	predicted amino-acid transporter subunit
563875	564625	1.18184	0.167072	564038	565201	intD	L	DNA replication, recombination and repair	DLP12 prophage; predicted integrase
1974625	1975625	1.18011	0.165606	1974276	1975163	motA	N	Cell motility and secretion	flagellar motor protein MotA
1974625	1975625	1.18011	0.165606	1975290	1975868	flhC	-	not classify	DNA-binding transcriptional dual regulator with FlhD
9000	9750	1.17824	0.164021	8238	9191	talB	-	not classify	transaldolase B
9000	9750	1.17824	0.164021	9306	9893	mogA	-	not classify	molybdenum cofactor biosynthesis protein
2245500	2247250	1.17709	0.163045	2245085	2246554	lysP	E	Amino acid transport and metabolism	lysine transporter
2245500	2247250	1.17709	0.163045	2246759	2247640	yeiE	K	Transcription	predicted DNA-binding transcriptional regulator
1455375	1456375	1.17682	0.162815	1454454	1455524	paaE	C	Energy production and conversion	predicted multicomponent oxygenase/reductase subunit for phenylacetic acid degradation
1455375	1456375	1.17682	0.162815	1455521	1456288	paaF	I	Lipid metabolism	enoyl-CoA hydratase-isomerase
1455375	1456375	1.17682	0.162815	1456288	1457076	paaG	I	Lipid metabolism	enoyl-CoA hydratase
1114000	1115000	1.17648	0.162528	1113487	1114713	mdtG	-	not classify	predicted drug efflux system
1114000	1115000	1.17648	0.162528	1114885	1115805	htrB	M	Cell envelope biogenesis, outer membrane	lipid A biosynthesis lauroyl acyltransferase
417750	418250	1.17628	0.162357	417113	418408	phoR	T	Signal transduction mechanism	sensory histidine kinase in two-component regulatory system with PhoB
1970375	1971125	1.17539	0.1616	1969054	1970715	tar	T	Signal transduction mechanism	methyl-accepting chemotaxis protein II
1970375	1971125	1.17539	0.1616	1970860	1971363	cheW	T	Signal transduction mechanism	purine-binding chemotaxis protein
765250	769250	1.17428	0.160655	765207	767183	mngA	G	Carbohydrate transport and metabolism	fused 2-O-a-mannosyl-D-glycerate specific PTS enzymes: IIA component/IIB component/IIC component
765250	769250	1.17428	0.160655	767201	769834	mngB	G	Carbohydrate transport and metabolism	alpha-mannosidase
3954875	3955875	1.17359	0.160068	3953354	3954898	ilvA	E	Amino acid transport and metabolism	threonine dehydratase
3954875	3955875	1.17359	0.160068	3954950	3955843	ilvY	K	Transcription	DNA-binding transcriptional dual regulator
959000	959750	1.17333	0.159845	958035	959318	aroA	E	Amino acid transport and metabolism	3-phosphoshikimate 1-carboxyvinyltransferase
959000	959750	1.17333	0.159845	959487	960251	ycaL	O	Posttranslational modification, protein turnover, chaperones	predicted peptidase with chaperone function
2886000	2887500	1.17212	0.158813	2885600	2886334	cysH	H	Coenzyme metabolism	phosphoadenosine phosphosulfate reductase
2886000	2887500	1.17212	0.158813	2886409	2888121	cysI	P	Inorganic ion transport and metabolism	sulfite reductase, beta subunit, NAD(P)-binding, heme-binding
4299000	4300750	1.17178	0.15852	4297587	4299053	yjcP	U	Intracellular trafficking, secretion,and vesicular transport	predicted outer membrane factor of efflux pump
4299000	4300750	1.17178	0.15852	4299050	4301101	yjcQ	S	Function unknown	predicted multidrug efflux system component
2454625	2455625	1.17161	0.158376	2454349	2454834	sixA	T	Signal transduction mechanism	phosphohistidine phosphatase
2454625	2455625	1.17161	0.158376	2455037	2457181	yfcX	I	Lipid metabolism	fused enoyl-CoA hydratase and epimerase and isomerase/3-hydroxyacyl-CoA dehydrogenase
1501875	1502625	1.1707	0.157599	1501681	1502889	ydcM	L	DNA replication, recombination and repair	predicted transposase
2167000	2171500	1.17005	0.157048	2166736	2167635	yegS	R	General function prediction only	hypothetical protein
2167000	2171500	1.17005	0.157048	2168251	2168559	insE-5	-	not classify	IS3 element protein InsE
2167000	2171500	1.17005	0.157048	2168556	2169422	insF-5	L	DNA replication, recombination and repair	IS3 element protein InsF
2167000	2171500	1.17005	0.157048	2169857	2170897	gatD	R	General function prediction only	galactitol-1-phosphate dehydrogenase, Zn-dependent and NAD(P)-binding
2167000	2171500	1.17005	0.157048	2170945	2172300	gatC	G	Carbohydrate transport and metabolism	galactitol-specific enzyme IIC component of PTS
2997125	3001875	1.16967	0.156722	3001511	3001990	xdhC	C	Energy production and conversion	xanthine dehydrogenase, Fe-S binding subunit
4304875	4305875	1.16945	0.156536	4305806	4306501	alsE	G	Carbohydrate transport and metabolism	allulose-6-phosphate 3-epimerase
3029500	3031500	1.16853	0.15575	3029389	3030837	ygfU	F	Nucleotide transport and metabolism	predicted transporter
3029500	3031500	1.16853	0.15575	3031087	3031635	idi	I	Lipid metabolism	isopentenyl-diphosphate delta-isomerase
1786375	1787375	1.16797	0.155268	1786459	1787505	aroH	E	Amino acid transport and metabolism	3-deoxy-D-arabino-heptulosonate-7-phosphate synthase, tryptophan repressible
948375	949875	1.16773	0.155062	947883	948791	ycaN	K	Transcription	predicted DNA-binding transcriptional regulator
948375	949875	1.16773	0.155062	948891	949481	ycaK	R	General function prediction only	hypothetical protein
948375	949875	1.16773	0.155062	949563	950303	pflA	O	Posttranslational modification, protein turnover, chaperones	pyruvate formate lyase activating enzyme 1
4088875	4092375	1.16479	0.152544	4087878	4088948	frvX	G	Carbohydrate transport and metabolism	predicted endo-1,4-beta-glucanase
4088875	4092375	1.16479	0.152544	4088938	4090389	frvB	G	Carbohydrate transport and metabolism	fused predicted PTS enzymes: IIB component/IIC component
4088875	4092375	1.16479	0.152544	4090400	4090846	frvA	T	Signal transduction mechanism	predicted enzyme IIA component of PTS
4088875	4092375	1.16479	0.152544	4091147	4091461	yiiL	-	not classify	L-rhamnose mutarotase
4088875	4092375	1.16479	0.152544	4091471	4092295	rhaD	G	Carbohydrate transport and metabolism	rhamnulose-1-phosphate aldolase
1161875	1163125	1.1623	0.150401	1161861	1162502	ycfM	R	General function prediction only	predicted outer membrane lipoprotein
1161875	1163125	1.1623	0.150401	1162483	1163307	ycfN	M	Cell envelope biogenesis, outer membrane	thiamin kinase
1814250	1815750	1.16053	0.148876	1815172	1816524	chbF	G	Carbohydrate transport and metabolism	cryptic phospho-beta-glucosidase, NAD(P)-binding
1287500	1289250	1.15832	0.146969	1287005	1287847	purU	F	Nucleotide transport and metabolism	formyltetrahydrofolate deformylase
1287500	1289250	1.15832	0.146969	1287897	1288355	ychJ	S	Function unknown	hypothetical protein
1287500	1289250	1.15832	0.146969	1288429	1289373	rssA	R	General function prediction only	hypothetical protein
3499000	3502500	1.15803	0.146719	3497932	3499269	frlA	E	Amino acid transport and metabolism	predicted fructoselysine transporter
3499000	3502500	1.15803	0.146719	3499290	3500312	frlB	M	Cell envelope biogenesis, outer membrane	fructoselysine-6-P-deglycase
3499000	3502500	1.15803	0.146719	3500362	3501192	frlC	G	Carbohydrate transport and metabolism	predicted isomerase
3499000	3502500	1.15803	0.146719	3501189	3501974	frlD	G	Carbohydrate transport and metabolism	fructoselysine 6-kinase
3499000	3502500	1.15803	0.146719	3502074	3502805	frlR	K	Transcription	predicted DNA-binding transcriptional regulator
3628375	3629125	1.15775	0.146474	3627558	3628625	yhiI	M	Cell envelope biogenesis, outer membrane	predicted HlyD family secretion protein
3628375	3629125	1.15775	0.146474	3628991	3630613	yhiJ	-	not classify	hypothetical protein
1157250	1161250	1.15727	0.146067	1157092	1158525	ptsG	G	Carbohydrate transport and metabolism	fused glucose-specific PTS enzymes: IIB component/IIC component
1157250	1161250	1.15727	0.146067	1158585	1160774	fhuE	P	Inorganic ion transport and metabolism	ferric-rhodotorulic acid outer membrane transporter
1157250	1161250	1.15727	0.146067	1161108	1161467	hinT	R	General function prediction only	purine nucleoside phosphoramidase
4457750	4459000	1.15643	0.145338	4457576	4457878	cybC	-	not classify	cytochrome b562, truncated (pseudogene)
4457750	4459000	1.15643	0.145338	4457923	4458387	nrdG	O	Posttranslational modification, protein turnover, chaperones	anaerobic ribonucleotide reductase activating protein
4457750	4459000	1.15643	0.145338	4458545	4460683	nrdD	F	Nucleotide transport and metabolism	anaerobic ribonucleoside triphosphate reductase
1284625	1285875	1.15451	0.143674	1284362	1285072	narJ	C	Energy production and conversion	molybdenum-cofactor-assembly chaperone subunit (delta subunit) of nitrate reductase 1
1284625	1285875	1.15451	0.143674	1285072	1285749	narI	C	Energy production and conversion	nitrate reductase 1, gamma (cytochrome b(NR)) subunit
2537750	2541000	1.15448	0.143653	2537739	2538836	cysA	P	Inorganic ion transport and metabolism	sulfate/thiosulfate transporter subunit
2537750	2541000	1.15448	0.143653	2538826	2539701	cysW	P	Inorganic ion transport and metabolism	sulfate/thiosulfate transporter subunit
2537750	2541000	1.15448	0.143653	2539701	2540534	cysU	O	Posttranslational modification, protein turnover, chaperones	sulfate/thiosulfate transporter subunit
2537750	2541000	1.15448	0.143653	2540534	2541550	cysP	P	Inorganic ion transport and metabolism	thiosulfate transporter subunit
3437625	3438625	1.15418	0.143394	3438062	3439051	rpoA	K	Transcription	DNA-directed RNA polymerase subunit alpha
2931625	2932375	1.15346	0.142769	2931063	2931710	fucA	G	Carbohydrate transport and metabolism	L-fuculose phosphate aldolase
2931625	2932375	1.15346	0.142769	2932257	2933573	fucP	G	Carbohydrate transport and metabolism	L-fucose transporter
1806750	1807750	1.15215	0.141632	1806721	1807257	yniB	-	not classify	predicted inner membrane protein
1806750	1807750	1.15215	0.141632	1807404	1808072	yniC	R	General function prediction only	predicted hydrolase
3870500	3873000	1.15204	0.141537	3869873	3871021	dgoD	R	General function prediction only	galactonate dehydratase
3870500	3873000	1.15204	0.141537	3871018	3871635	dgoA	G	Carbohydrate transport and metabolism	2-dehydro-3-deoxy-6-phosphogalactonate aldolase
3870500	3873000	1.15204	0.141537	3871619	3872497	dgoK	-	not classify	2-oxo-3-deoxygalactonate kinase
3870500	3873000	1.15204	0.141537	3872494	3873183	dgoR	K	Transcription	predicted DNA-binding transcriptional regulator
478875	479875	1.1508	0.140454	478591	479142	maa	R	General function prediction only	maltose O-acetyltransferase
478875	479875	1.1508	0.140454	479314	479532	hha	-	not classify	modulator of gene expression, with H-NS
478875	479875	1.1508	0.140454	479558	479932	ybaJ	-	not classify	hypothetical protein
3966000	3966500	1.1506	0.140283	3965939	3967042	rfe	M	Cell envelope biogenesis, outer membrane	UDP-GlcNAc:undecaprenylphosphate GlcNAc-1-phosphate transferase
1532250	1533750	1.14981	0.1396	1532048	1532893	nhoA	Q	Secondary metabolites biosynthesis, transport and catabolism	N-hydroxyarylamine O-acetyltransferase
1532250	1533750	1.14981	0.1396	1532989	1533882	yddE	R	General function prediction only	hypothetical protein
1861250	1861750	1.14624	0.136484	1860795	1861790	gapA	G	Carbohydrate transport and metabolism	glyceraldehyde-3-phosphate dehydrogenase
3282375	3283625	1.14615	0.136412	3282192	3282668	agaB	-	not classify	N-acetylgalactosamine-specific enzyme IIB component of PTS
3282375	3283625	1.14615	0.136412	3282707	3283510	agaC	-	not classify	N-acetylgalactosamine-specific enzyme IIC component of PTS
3282375	3283625	1.14615	0.136412	3283500	3284291	agaD	-	not classify	N-acetylgalactosamine-specific enzyme IID component of PTS
3459000	3460500	1.14558	0.135909	3457839	3459035	gspF	U	Intracellular trafficking, secretion,and vesicular transport	general secretory pathway component, cryptic
3459000	3460500	1.14558	0.135909	3459045	3459482	gspG	U	Intracellular trafficking, secretion,and vesicular transport	pseudopilin, cryptic, general secretion pathway
3459000	3460500	1.14558	0.135909	3459490	3459999	gspH	-	not classify	predicted general secretory pathway component, cryptic
3459000	3460500	1.14558	0.135909	3459996	3460373	gspI	U	Intracellular trafficking, secretion,and vesicular transport	general secretory pathway component, cryptic
3459000	3460500	1.14558	0.135909	3460366	3460953	gspJ	U	Intracellular trafficking, secretion,and vesicular transport	predicted general secretory pathway component, cryptic
343625	345125	1.14534	0.135703	343400	344215	yahL	-	not classify	hypothetical protein
343625	345125	1.14534	0.135703	344628	344873	yahM	-	not classify	hypothetical protein
343625	345125	1.14534	0.135703	344890	345561	yahN	E	Amino acid transport and metabolism	neutral amino-acid efflux system
3115375	3119875	1.14401	0.134543	3112572	3117134	yghJ	-	not classify	predicted inner membrane lipoprotein
3115375	3119875	1.14401	0.134543	3117619	3119301	yghK	C	Energy production and conversion	glycolate transporter
3115375	3119875	1.14401	0.134543	3119656	3121827	glcB	C	Energy production and conversion	malate synthase
4201000	4202750	1.14322	0.133845	4199949	4201346	zraS	T	Signal transduction mechanism	sensory histidine kinase in two-component regulatory system with ZraR
4201000	4202750	1.14322	0.133845	4201343	4202668	zraR	T	Signal transduction mechanism	fused DNA-binding response regulator in two-component regulatory system with ZraS: response regulator/sigma54 interaction protein
4201000	4202750	1.14322	0.133845	4202665	4203954	purD	F	Nucleotide transport and metabolism	phosphoribosylamine--glycine ligase
3979875	3980375	1.14305	0.1337	3978910	3980295	yifK	E	Amino acid transport and metabolism	predicted transporter
1267250	1268500	1.14118	0.132065	1266543	1267352	ychA	S	Function unknown	predicted transcriptional regulator
1267250	1268500	1.14118	0.132065	1267388	1268242	kdsA	M	Cell envelope biogenesis, outer membrane	2-dehydro-3-deoxyphosphooctonate aldolase
1267250	1268500	1.14118	0.132065	1268391	1268498	ldrA	-	not classify	toxic polypeptide, small
2555875	2557375	1.13944	0.130534	2555340	2556701	eutB	-	not classify	ethanolamine ammonia-lyase, large subunit, heavy chain
2555875	2557375	1.13944	0.130534	2556793	2558088	intZ	L	DNA replication, recombination and repair	CPZ-55 prophage; predicted integrase
3706750	3707500	1.13857	0.12977	3706807	3708498	eptB	R	General function prediction only	predicted metal dependent hydrolase
992000	993250	1.13835	0.129584	989845	992457	pepN	E	Amino acid transport and metabolism	aminopeptidase N
992000	993250	1.13835	0.129584	992500	993267	ssuB	P	Inorganic ion transport and metabolism	alkanesulfonate transporter subunit
855500	857000	1.13652	0.127971	855186	856778	ybiT	R	General function prediction only	fused predicted transporter subunits of ABC superfamily: ATP-binding components
111125	113375	1.13597	0.127488	111044	111433	mutT	R	General function prediction only	nucleoside triphosphate pyrophosphohydrolase, marked preference for dGTP
111125	113375	1.13597	0.127488	111649	111846	yacG	-	not classify	zinc-binding protein
111125	113375	1.13597	0.127488	111856	112599	yacF	-	not classify	hypothetical protein
111125	113375	1.13597	0.127488	112599	113219	coaE	H	Coenzyme metabolism	dephospho-CoA kinase
3491875	3494875	1.13561	0.127167	3494573	3494899	nirD	R	General function prediction only	nitrite reductase small subunit
3718250	3719000	1.13545	0.127029	3718072	3718284	cspA	-	not classify	major cold shock protein
3718250	3719000	1.13545	0.127029	3718471	3718623	hokA	-	not classify	toxic polypeptide, small
3718250	3719000	1.13545	0.127029	3718703	3719224	insJ	L	DNA replication, recombination and repair	IS150 protein InsA
292375	292875	1.13361	0.125405	292444	293142	yagL	L	DNA replication, recombination and repair	CP4-6 prophage; DNA-binding protein
1679000	1680250	1.13286	0.124745	1679000	1679722	ydgB	R	General function prediction only	short chain dehydrogenase
1679000	1680250	1.13286	0.124745	1679719	1680054	ydgC	-	not classify	conserved inner membrane protein associated with alginate biosynthesis
1679000	1680250	1.13286	0.124745	1680174	1680902	rstA	K	Transcription	DNA-binding response regulator in two-component regulatory system with RstB
4278125	4279125	1.13273	0.124626	4278003	4279652	yjcE	P	Inorganic ion transport and metabolism	predicted cation/proton antiporter
2522750	2523750	1.13226	0.124217	2522067	2522900	xapA	F	Nucleotide transport and metabolism	purine nucleoside phosphorylase
2522750	2523750	1.13226	0.124217	2523149	2523913	yfeN	-	not classify	conserved outer membrane protein
285125	286125	1.1319	0.123894	284619	286001	yagG	G	Carbohydrate transport and metabolism	CP4-6 prophage; predicted sugar transporter
285125	286125	1.1319	0.123894	286013	287623	yagH	G	Carbohydrate transport and metabolism	CP4-6 prophage; predicted xylosidase/arabinosidase
3252250	3252750	1.13189	0.123886	3252341	3253042	yhaK	R	General function prediction only	predicted pirin-related protein
1190125	1191875	1.13168	0.123706	1189839	1191209	purB	F	Nucleotide transport and metabolism	adenylosuccinate lyase
1190125	1191875	1.13168	0.123706	1191213	1191854	ycfC	R	General function prediction only	hypothetical protein
3878250	3879500	1.13119	0.123266	3878171	3879244	recF	L	DNA replication, recombination and repair	recombination protein F
3878250	3879500	1.13119	0.123266	3879244	3880344	dnaN	L	DNA replication, recombination and repair	DNA polymerase III subunit beta
2767000	2769000	1.13093	0.123038	2766687	2767508	yfjQ	-	not classify	CP4-57 prophage; predicted protein
2767000	2769000	1.13093	0.123038	2767725	2768426	yfjR	K	Transcription	CP4-57 prophage; predicted DNA-binding transcriptional regulator
2767000	2769000	1.13093	0.123038	2768467	2768703	ypjK	-	not classify	CP4-57 prophage; predicted inner membrane protein
2767000	2769000	1.13093	0.123038	2768703	2769146	yfjS	-	not classify	CP4-57 prophage; predicted protein
3797625	3798875	1.13086	0.122975	3797368	3798219	rfaZ	-	not classify	lipopolysaccharide core biosynthesis protein
3797625	3798875	1.13086	0.122975	3798290	3798988	rfaY	R	General function prediction only	lipopolysaccharide core biosynthesis protein
498625	499375	1.13031	0.122492	498238	499197	aes	I	Lipid metabolism	acetyl esterase
498625	499375	1.13031	0.122492	499349	500653	gsk	G	Carbohydrate transport and metabolism	inosine/guanosine kinase
3712125	3715125	1.12856	0.120942	3712084	3714363	bisC	C	Energy production and conversion	biotin sulfoxide reductase
3712125	3715125	1.12856	0.120942	3714570	3715229	yiaD	M	Cell envelope biogenesis, outer membrane	predicted outer membrane lipoprotien
3603000	3605000	1.12854	0.120927	3602416	3603012	yhhF	L	DNA replication, recombination and repair	predicted methyltransferase
3603000	3605000	1.12854	0.120927	3603002	3603271	yhhL	-	not classify	conserved inner membrane protein
3603000	3605000	1.12854	0.120927	3603274	3603633	yhhM	-	not classify	hypothetical protein
3603000	3605000	1.12854	0.120927	3603774	3604400	yhhN	S	Function unknown	conserved inner membrane protein
3603000	3605000	1.12854	0.120927	3604474	3606672	zntA	P	Inorganic ion transport and metabolism	zinc, cobalt and lead efflux system
2662500	2663250	1.12808	0.120521	2662385	2663266	yfhR	R	General function prediction only	predicted peptidase
2468750	2475250	1.12213	0.115231	2474716	2475651	dsdC	K	Transcription	DNA-binding transcriptional dual regulator
3828625	3831375	1.12212	0.11522	3828480	3830189	yicH	-	not classify	hypothetical protein
3828625	3831375	1.12212	0.11522	3830242	3832560	yicI	G	Carbohydrate transport and metabolism	predicted alpha-glucosidase
1901000	1901500	1.12102	0.114242	1900072	1901043	manX	G	Carbohydrate transport and metabolism	fused mannose-specific PTS enzymes: IIA component/IIB component
1901000	1901500	1.12102	0.114242	1901106	1901906	manY	-	not classify	mannose-specific enzyme IIC component of PTS
2092000	2092750	1.11951	0.11289	2091492	2092559	hisB	E	Amino acid transport and metabolism	imidazole glycerol-phosphate dehydratase/histidinol phosphatase
2092000	2092750	1.11951	0.11289	2092559	2093149	hisH	E	Amino acid transport and metabolism	imidazole glycerol phosphate synthase subunit HisH
3921250	3921750	1.11918	0.112592	3921080	3921703	gidB	M	Cell envelope biogenesis, outer membrane	glucose-inhibited division protein B
208125	209375	1.1188	0.112259	205126	208608	dnaE	L	DNA replication, recombination and repair	DNA polymerase III subunit alpha
208125	209375	1.1188	0.112259	208621	209580	accA	I	Lipid metabolism	acetyl-CoA carboxylase subunit alpha
3897750	3898500	1.11839	0.11189	3897431	3898627	yieL	P	Inorganic ion transport and metabolism	predicted xylanase
3851000	3851500	1.11821	0.111733	3850913	3851011	ivbL	-	not classify	ilvB operon leader peptide
1814875	1815625	1.11673	0.110403	1814410	1815159	ydjC	-	not classify	hypothetical protein
1814875	1815625	1.11673	0.110403	1815172	1816524	chbF	G	Carbohydrate transport and metabolism	cryptic phospho-beta-glucosidase, NAD(P)-binding
271625	273375	1.11541	0.109219	273325	274341	insH-1	L	DNA replication, recombination and repair	CP4-6 prophage; IS5 transposase and trans-activator
3806375	3807625	1.11309	0.107136	3806563	3807840	kdtA	M	Cell envelope biogenesis, outer membrane	3-deoxy-D-manno-octulosonic-acid transferase
533750	536250	1.11211	0.106262	533140	534921	gcl	R	General function prediction only	glyoxylate carboligase
533750	536250	1.11211	0.106262	534934	535710	hyi	G	Carbohydrate transport and metabolism	hydroxypyruvate isomerase
533750	536250	1.11211	0.106262	535810	536688	glxR	I	Lipid metabolism	tartronate semialdehyde reductase, NADH-dependent
3597750	3598750	1.10725	0.101878	3597952	3598806	rpoH	K	Transcription	RNA polymerase sigma factor
4600875	4601375	1.10492	0.0997759	4600111	4600881	yjjP	S	Function unknown	predicted inner membrane protein
852375	852875	1.10425	0.0991636	852870	853988	ybiR	P	Inorganic ion transport and metabolism	predicted transporter
4088875	4090625	1.10327	0.0982771	4087878	4088948	frvX	G	Carbohydrate transport and metabolism	predicted endo-1,4-beta-glucanase
4088875	4090625	1.10327	0.0982771	4088938	4090389	frvB	G	Carbohydrate transport and metabolism	fused predicted PTS enzymes: IIB component/IIC component
4088875	4090625	1.10327	0.0982771	4090400	4090846	frvA	T	Signal transduction mechanism	predicted enzyme IIA component of PTS
738250	741250	1.10215	0.0972626	738224	738733	ybgA	S	Function unknown	hypothetical protein
738250	741250	1.10215	0.0972626	738730	740148	phr	L	DNA replication, recombination and repair	deoxyribodipyrimidine photolyase, FAD-binding
738250	741250	1.10215	0.0972626	740298	741779	ybgH	E	Amino acid transport and metabolism	predicted transporter
3761875	3766375	1.10113	0.0963382	3760206	3764339	rhsA	M	Cell envelope biogenesis, outer membrane	rhsA element core protein RshA
3761875	3766375	1.10113	0.0963382	3764360	3765202	yibA	C	Energy production and conversion	lyase containing HEAT-repeat
3761875	3766375	1.10113	0.0963382	3765244	3765945	yibJ	M	Cell envelope biogenesis, outer membrane	predicted Rhs-family protein
3761875	3766375	1.10113	0.0963382	3766200	3766661	yibG	R	General function prediction only	hypothetical protein
1644750	1645500	1.10082	0.0960515	1644429	1644761	flxA	-	not classify	Qin prophage; predicted protein
1644750	1645500	1.10082	0.0960515	1645198	1645347	ydfW	-	not classify	Qin prophage; predicted protein
1644750	1645500	1.10082	0.0960515	1645370	1645660	ydfX	-	not classify	Qin prophage; predicted protein
647625	649375	1.1003	0.0955812	647262	648794	citF	C	Energy production and conversion	citrate lyase, citrate-ACP transferase (alpha) subunit
647625	649375	1.1003	0.0955812	648805	649713	citE	G	Carbohydrate transport and metabolism	citrate lyase, citryl-ACP lyase (beta) subunit
3049875	3050625	1.10002	0.0953264	3049137	3050339	visC	C	Energy production and conversion	hypothetical protein
3049875	3050625	1.10002	0.0953264	3050362	3051540	ubiH	C	Energy production and conversion	2-octaprenyl-6-methoxyphenyl hydroxylase
4320750	4322000	1.09949	0.0948484	4320466	4320834	phnE_2	P	Inorganic ion transport and metabolism	phosphonate/organophosphate ester transporter (pseudogene)
4320750	4322000	1.09949	0.0948484	4320684	4321304	phnE_1	P	Inorganic ion transport and metabolism	phosphonate/organophosphate ester transporter subunit
4320750	4322000	1.09949	0.0948484	4321359	4322375	phnD	P	Inorganic ion transport and metabolism	phosphonate/organophosphate ester transporter subunit
4416750	4417250	1.09932	0.0946893	4416584	4417648	ulaG	R	General function prediction only	predicted L-ascorbate 6-phosphate lactonase
2678500	2679500	1.09855	0.0939875	2677486	2680767	yphG	-	not classify	hypothetical protein
1995500	1996250	1.09781	0.0933208	1995086	1995838	yecC	E	Amino acid transport and metabolism	predicted transporter subunit: ATP-binding component of ABC superfamily
1995500	1996250	1.09781	0.0933208	1995835	1996503	yecS	E	Amino acid transport and metabolism	predicted transporter subunit: membrane component of ABC superfamily
1848750	1850500	1.09602	0.0916845	1849911	1850552	pncA	Q	Secondary metabolites biosynthesis, transport and catabolism	nicotinamidase/pyrazinamidase
2666625	2669375	1.09589	0.0915633	2666028	2666918	hcaR	K	Transcription	DNA-binding transcriptional activator of 3-phenylpropionic acid catabolism
2666625	2669375	1.09589	0.0915633	2667054	2668415	hcaE	R	General function prediction only	3-phenylpropionate dioxygenase, large (alpha) subunit
2666625	2669375	1.09589	0.0915633	2668412	2668930	hcaF	Q	Secondary metabolites biosynthesis, transport and catabolism	3-phenylpropionate dioxygenase, small (beta) subunit
2666625	2669375	1.09589	0.0915633	2668930	2669250	hcaC	R	General function prediction only	3-phenylpropionate dioxygenase, predicted ferredoxin subunit
2666625	2669375	1.09589	0.0915633	2669247	2670059	hcaB	R	General function prediction only	2,3-dihydroxy-2,3-dihydrophenylpropionate dehydrogenase
638625	639125	1.09458	0.0903728	638168	638731	ahpC	O	Posttranslational modification, protein turnover, chaperones	alkyl hydroperoxide reductase, C22 subunit
638625	639125	1.09458	0.0903728	638976	640541	ahpF	O	Posttranslational modification, protein turnover, chaperones	alkyl hydroperoxide reductase, F52a subunit, FAD/NAD(P)-binding
3786125	3787125	1.0925	0.0884679	3786124	3787083	yibQ	-	not classify	predicted polysaccharide deacetylase
3786125	3787125	1.0925	0.0884679	3787070	3788104	yibD	M	Cell envelope biogenesis, outer membrane	predicted glycosyl transferase
4293125	4294625	1.09037	0.086518	4292504	4293817	gltP	C	Energy production and conversion	glutamate/aspartate:proton symporter
4293125	4294625	1.09037	0.086518	4294459	4295148	yjcO	R	General function prediction only	hypothetical protein
1646875	1647375	1.0902	0.0863635	1646847	1647065	ydfC	-	not classify	Qin prophage; predicted protein
830500	835500	1.08994	0.0861203	830095	831459	rhlE	J	Translation, ribosomal structure and biogenesis	RNA helicase
830500	835500	1.08994	0.0861203	831691	832173	ybiA	S	Function unknown	hypothetical protein
830500	835500	1.08994	0.0861203	832293	834443	dinG	L	DNA replication, recombination and repair	ATP-dependent DNA helicase
830500	835500	1.08994	0.0861203	834471	835433	ybiB	E	Amino acid transport and metabolism	hypothetical protein
50000	50500	1.08993	0.0861112	49823	50302	folA	H	Coenzyme metabolism	dihydrofolate reductase
50000	50500	1.08993	0.0861112	50380	51222	apaH	T	Signal transduction mechanism	diadenosinetetraphosphatase
1392875	1396375	1.0894	0.0856245	1395696	1396646	uspE	T	Signal transduction mechanism	stress-induced protein
3915625	3918375	1.08919	0.0854313	3915425	3916288	atpG	C	Energy production and conversion	F0F1 ATP synthase subunit gamma
3915625	3918375	1.08919	0.0854313	3916339	3917880	atpA	C	Energy production and conversion	F0F1 ATP synthase subunit alpha
3915625	3918375	1.08919	0.0854313	3917893	3918426	atpH	C	Energy production and conversion	F0F1 ATP synthase subunit delta
3088125	3089125	1.08812	0.0844499	3087777	3088274	sprT	-	not classify	hypothetical protein
3088125	3089125	1.08812	0.0844499	3088369	3089076	endA	L	DNA replication, recombination and repair	DNA-specific endonuclease I
1960750	1961500	1.08811	0.0844414	1960604	1960996	flhE	-	not classify	hypothetical protein
1960750	1961500	1.08811	0.0844414	1960996	1963074	flhA	U	Intracellular trafficking, secretion,and vesicular transport	flagellar biosynthesis protein A
4277875	4279875	1.08781	0.0841641	4279806	4281098	yjcF	S	Function unknown	hypothetical protein
3008500	3011000	1.08732	0.0837147	3008050	3009435	ygeZ	F	Nucleotide transport and metabolism	dihydropyrimidinase
3008500	3011000	1.08732	0.0837147	3009483	3010415	yqeA	E	Amino acid transport and metabolism	predicted amino acid kinase
3008500	3011000	1.08732	0.0837147	3010636	3012261	yqeB	R	General function prediction only	conserved protein with NAD(P)-binding Rossman fold
3418375	3422125	1.08729	0.0836847	3418156	3419337	yhdX	E	Amino acid transport and metabolism	predicted amino-acid transporter subunit
3418375	3422125	1.08729	0.0836847	3419347	3420450	yhdY	E	Amino acid transport and metabolism	predicted amino-acid transporter subunit
3418375	3422125	1.08729	0.0836847	3420458	3421216	yhdZ	E	Amino acid transport and metabolism	predicted amino-acid transporter subunit
2291375	2293375	1.08715	0.0835551	2290983	2292926	ccmF	O	Posttranslational modification, protein turnover, chaperones	heme lyase, CcmF subunit
2291375	2293375	1.08715	0.0835551	2292923	2293402	ccmE	O	Posttranslational modification, protein turnover, chaperones	periplasmic heme chaperone
2260750	2262000	1.08686	0.0832941	2260387	2261517	fruB	G	Carbohydrate transport and metabolism	fused fructose-specific PTS enzymes: IIA component/HPr component
2260750	2262000	1.08686	0.0832941	2261885	2263066	setB	-	not classify	lactose/glucose efflux system
640625	641625	1.08553	0.0820657	641311	642549	ybdR	R	General function prediction only	predicted oxidoreductase, Zn-dependent and NAD(P)-binding
3295125	3295625	1.08331	0.0800251	3295120	3296160	yraQ	R	General function prediction only	predicted permease
704500	705000	1.08266	0.0794207	703167	705113	nagE	G	Carbohydrate transport and metabolism	fused N-acetyl glucosamine specific PTS enzyme: IIC, IIB , and IIA components
4376000	4382750	1.08121	0.0780822	4375834	4376967	ampC	V	Defense mechanisms	beta-lactamase/D-alanine carboxypeptidase
4376000	4382750	1.08121	0.0780822	4377030	4377389	frdD	-	not classify	fumarate reductase subunit D
4376000	4382750	1.08121	0.0780822	4377400	4377795	frdC	-	not classify	fumarate reductase subunit C
4376000	4382750	1.08121	0.0780822	4377806	4378540	frdB	C	Energy production and conversion	fumarate reductase (anaerobic), Fe-S subunit
4376000	4382750	1.08121	0.0780822	4378533	4380341	frdA	C	Energy production and conversion	fumarate reductase
4376000	4382750	1.08121	0.0780822	4380666	4381643	yjeA	J	Translation, ribosomal structure and biogenesis	lysyl-tRNA synthetase
4376000	4382750	1.08121	0.0780822	4381862	4383364	yjeM	E	Amino acid transport and metabolism	predicted transporter
3964375	3972875	1.08097	0.0778616	3972619	3973164	rffC	-	not classify	TDP-fucosamine acetyltransferase
3504250	3508000	1.08029	0.0772298	3504054	3505358	yhfT	-	not classify	predicted inner membrane protein
3504250	3508000	1.08029	0.0772298	3505370	3505723	yhfU	-	not classify	hypothetical protein
3504250	3508000	1.08029	0.0772298	3505734	3506612	php	R	General function prediction only	predicted hydrolase
3504250	3508000	1.08029	0.0772298	3506609	3507835	yhfW	G	Carbohydrate transport and metabolism	predicted mutase
3504250	3508000	1.08029	0.0772298	3507835	3508998	yhfX	E	Amino acid transport and metabolism	predicted amino acid racemase
1612125	1614125	1.08018	0.0771255	1611339	1612727	yneI	C	Energy production and conversion	predicted aldehyde dehydrogenase
1612125	1614125	1.08018	0.0771255	1612828	1613709	yneJ	K	Transcription	predicted DNA-binding transcriptional regulator
1612125	1614125	1.08018	0.0771255	1613787	1614902	yneK	-	not classify	hypothetical protein
175250	176250	1.07884	0.075883	175107	176528	yadQ	P	Inorganic ion transport and metabolism	chloride channel protein
866875	870875	1.07615	0.0733935	866776	868614	yliA	R	General function prediction only	fused predicted peptide transport subunits of ABC superfamily: ATP-binding components
866875	870875	1.07615	0.0733935	868634	870172	yliB	E	Amino acid transport and metabolism	predicted peptide transporter subunit: periplasmic-binding component of ABC superfamily
866875	870875	1.07615	0.0733935	870190	871110	yliC	P	Inorganic ion transport and metabolism	predicted peptide transporter subunit: membrane component of ABC superfamily
4444625	4445625	1.07601	0.0732644	4442135	4445914	ytfN	S	Function unknown	hypothetical protein
4637750	4638250	1.07573	0.072999	4637613	4638329	arcA	K	Transcription	DNA-binding response regulator in two-component regulatory system with ArcB or CpxA
1255875	1256375	1.07562	0.0729006	1255944	1257035	ychF	J	Translation, ribosomal structure and biogenesis	translation-associated GTPase
197875	199625	1.07533	0.0726286	196546	197898	yaeL	M	Cell envelope biogenesis, outer membrane	zinc metallopeptidase
197875	199625	1.07533	0.0726286	197928	200360	yaeT	M	Cell envelope biogenesis, outer membrane	hypothetical protein
1373250	1374500	1.07512	0.0724284	1372987	1374039	ycjQ	R	General function prediction only	predicted oxidoreductase, Zn-dependent and NAD(P)-binding
1373250	1374500	1.07512	0.0724284	1374058	1374846	ycjR	G	Carbohydrate transport and metabolism	predicted enzyme
2140125	2143125	1.07402	0.0714088	2139658	2140239	dcd	F	Nucleotide transport and metabolism	deoxycytidine triphosphate deaminase
2140125	2143125	1.07402	0.0714088	2140331	2140972	udk	F	Nucleotide transport and metabolism	uridine kinase
2140125	2143125	1.07402	0.0714088	2141290	2144607	yegE	T	Signal transduction mechanism	predicted diguanylate cyclase, GGDEF domain signalling protein
4496000	4497750	1.0718	0.0693437	4497622	4497957	yjgW	-	not classify	KpLE2 phage-like element; predicted protein
3373500	3374000	1.07095	0.0685429	3372891	3374258	dcuD	C	Energy production and conversion	predicted transporter
4507000	4508250	1.06787	0.0656679	4506981	4507577	insO-2	L	DNA replication, recombination and repair	KpLE2 phage-like element; partial transposase of insertion element IS911B
4507000	4508250	1.06787	0.0656679	4507743	4508156	yjhV	R	General function prediction only	KpLE2 phage-like element; predicted protein
1830625	1831125	1.06661	0.0644874	1830452	1831258	xthA	L	DNA replication, recombination and repair	exonuclease III
1394375	1395625	1.06618	0.0640832	1394100	1395116	insH-4	L	DNA replication, recombination and repair	IS5 transposase and trans-activator
1394375	1395625	1.06618	0.0640832	1395389	1395646	ynaJ	-	not classify	predicted inner membrane protein
4566250	4568250	1.06607	0.0639832	4565310	4566542	yjiO	-	not classify	multidrug efflux system protein
4566250	4568250	1.06607	0.0639832	4567021	4567332	yjiP	-	not classify	predicted transposase (pseudogene)
4566250	4568250	1.06607	0.0639832	4567381	4567941	yjiQ	-	not classify	predicted transposase
4566250	4568250	1.06607	0.0639832	4568185	4569597	yjiR	E	Amino acid transport and metabolism	fused predicted DNA-binding transcriptional regulator/predicted aminotransferase
1257625	1258125	1.06599	0.0639036	1257152	1257736	pth	-	not classify	peptidyl-tRNA hydrolase
1257625	1258125	1.06599	0.0639036	1258014	1258292	ychH	-	not classify	predicted inner membrane protein
3437500	3439500	1.06594	0.0638601	3437163	3437531	yhdN	-	not classify	hypothetical protein
3437500	3439500	1.06594	0.0638601	3437638	3438021	rplQ	J	Translation, ribosomal structure and biogenesis	50S ribosomal protein L17
3437500	3439500	1.06594	0.0638601	3438062	3439051	rpoA	K	Transcription	DNA-directed RNA polymerase subunit alpha
3437500	3439500	1.06594	0.0638601	3439077	3439697	rpsD	J	Translation, ribosomal structure and biogenesis	30S ribosomal protein S4
76125	77625	1.06584	0.0637587	75644	77299	sgrR	R	General function prediction only	DNA-binding transcriptional regulator
76125	77625	1.06584	0.0637587	77621	78799	setA	-	not classify	broad specificity sugar efflux system
3873250	3874500	1.06565	0.0635846	3874163	3874975	yidA	R	General function prediction only	predicted hydrolase
4479375	4488375	1.06448	0.0624898	4479005	4481860	valS	J	Translation, ribosomal structure and biogenesis	valyl-tRNA synthetase
4479375	4488375	1.06448	0.0624898	4481860	4482303	holC	-	not classify	DNA polymerase III subunit chi
4479375	4488375	1.06448	0.0624898	4482463	4483974	pepA	-	not classify	leucyl aminopeptidase
4479375	4488375	1.06448	0.0624898	4484241	4485341	yjgP	-	not classify	conserved inner membrane protein
4479375	4488375	1.06448	0.0624898	4485341	4486423	yjgQ	-	not classify	conserved inner membrane protein
4479375	4488375	1.06448	0.0624898	4486584	4488086	yjgR	R	General function prediction only	predicted ATPase
4479375	4488375	1.06448	0.0624898	4488164	4489162	idnR	K	Transcription	DNA-binding transcriptional repressor, 5-gluconate-binding
3864500	3865000	1.06446	0.0624693	3864492	3864920	ibpB	O	Posttranslational modification, protein turnover, chaperones	heat shock chaperone
2177250	2177750	1.06333	0.0614017	2176843	2178120	yegT	-	not classify	predicted nucleoside transporter
1052125	1053375	1.06295	0.0610508	1051512	1052585	yccM	C	Energy production and conversion	predicted 4Fe-4S membrane protein
1052125	1053375	1.06295	0.0610508	1052657	1055401	torS	T	Signal transduction mechanism	hybrid sensory histidine kinase in two-component regulatory system with TorR
838875	841125	1.06264	0.0607531	838472	840754	fiu	P	Inorganic ion transport and metabolism	predicted iron outer membrane transporter
838875	841125	1.06264	0.0607531	841019	841279	ybiM	-	not classify	hypothetical protein
2582125	2582875	1.06049	0.0587351	2581568	2583547	aegA	C	Energy production and conversion	fused predicted oxidoreductase: FeS binding subunit/NAD/FAD-binding subunit
1863375	1864625	1.06026	0.0585174	1862806	1863660	yeaE	R	General function prediction only	predicted oxidoreductase
1863375	1864625	1.06026	0.0585174	1863750	1864496	mipA	-	not classify	scaffolding protein for murein synthesizing machinery
156000	156750	1.05938	0.0576808	155461	156201	ecpD	U	Intracellular trafficking, secretion,and vesicular transport	predicted periplasmic pilin chaperone
156000	156750	1.05938	0.0576808	156299	156883	yadN	U	Intracellular trafficking, secretion,and vesicular transport	predicted fimbrial-like adhesin protein
4449125	4449875	1.05924	0.0575512	4449081	4450583	ytfR	G	Carbohydrate transport and metabolism	predicted sugar transporter subunit: ATP-binding component of ABC superfamily
114500	116250	1.05835	0.0567108	115714	117099	hofB	U	Intracellular trafficking, secretion,and vesicular transport	conserved protein with nucleoside triphosphate hydrolase domain
1066375	1070625	1.05493	0.0534742	1066335	1066931	wrbA	R	General function prediction only	TrpR binding protein WrbA
1066375	1070625	1.05493	0.0534742	1067304	1067477	ymdF	-	not classify	hypothetical protein
1066375	1070625	1.05493	0.0534742	1067734	1069062	ycdG	F	Nucleotide transport and metabolism	predicted transporter
1066375	1070625	1.05493	0.0534742	1069083	1069577	ycdH	R	General function prediction only	predicted oxidoreductase, flavin:NADH component
1066375	1070625	1.05493	0.0534742	1069588	1070178	ycdI	C	Energy production and conversion	hypothetical protein
1066375	1070625	1.05493	0.0534742	1070188	1070988	rarA	R	General function prediction only	predicted hydrolase
3979750	3980500	1.05434	0.0529114	3978910	3980295	yifK	E	Amino acid transport and metabolism	predicted transporter
4376000	4377250	1.05426	0.0528416	4375834	4376967	ampC	V	Defense mechanisms	beta-lactamase/D-alanine carboxypeptidase
4376000	4377250	1.05426	0.0528416	4377030	4377389	frdD	-	not classify	fumarate reductase subunit D
3564750	3572000	1.05244	0.0511089	3564623	3566056	glgA	G	Carbohydrate transport and metabolism	glycogen synthase
3564750	3572000	1.05244	0.0511089	3566056	3567351	glgC	G	Carbohydrate transport and metabolism	glucose-1-phosphate adenylyltransferase
3564750	3572000	1.05244	0.0511089	3567369	3569342	glgX	G	Carbohydrate transport and metabolism	glycogen debranching enzyme
3564750	3572000	1.05244	0.0511089	3569339	3571525	glgB	G	Carbohydrate transport and metabolism	glycogen branching enzyme
3564750	3572000	1.05244	0.0511089	3571798	3572901	asd	E	Amino acid transport and metabolism	aspartate-semialdehyde dehydrogenase
2145375	2145875	1.05176	0.0504632	2144716	2145564	alkA	L	DNA replication, recombination and repair	3-methyl-adenine DNA glycosylase II
2145375	2145875	1.05176	0.0504632	2145698	2147050	yegD	O	Posttranslational modification, protein turnover, chaperones	predicted chaperone
4374000	4375000	1.05057	0.0493312	4373722	4374288	efp	J	Translation, ribosomal structure and biogenesis	elongation factor P
4374000	4375000	1.05057	0.0493312	4374340	4374465	ecnA	-	not classify	entericidin A membrane lipoprotein, antidote entericidin B
4374000	4375000	1.05057	0.0493312	4374576	4374722	ecnB	S	Function unknown	entericidin B membrane lipoprotein
4374000	4375000	1.05057	0.0493312	4374898	4375215	sugE	P	Inorganic ion transport and metabolism	multidrug efflux system protein
4092750	4095500	1.05054	0.0493033	4092746	4094005	rhaA	-	not classify	L-rhamnose isomerase
4092750	4095500	1.05054	0.0493033	4094002	4095471	rhaB	G	Carbohydrate transport and metabolism	rhamnulokinase
3080000	3080750	1.05024	0.0490191	3079935	3080693	yggG	O	Posttranslational modification, protein turnover, chaperones	predicted peptidase
1833625	1835375	1.05015	0.048933	1833539	1834087	ynjA	S	Function unknown	hypothetical protein
1833625	1835375	1.05015	0.048933	1834097	1835263	ynjB	R	General function prediction only	hypothetical protein
1833625	1835375	1.05015	0.048933	1835281	1836771	ynjC	R	General function prediction only	fused transporter subunits of ABC superfamily: membrane components
3041500	3043500	1.05013	0.0489133	3041334	3041645	yqfB	-	not classify	hypothetical protein
3041500	3043500	1.05013	0.0489133	3041684	3043123	bglA	-	not classify	6-phospho-beta-glucosidase A
3041500	3043500	1.05013	0.0489133	3043180	3043923	ygfF	R	General function prediction only	predicted NAD(P)-binding oxidoreductase with NAD(P)-binding Rossmann-fold domain
1756000	1765750	1.04975	0.0485558	1755745	1756749	ynhG	S	Function unknown	hypothetical protein
1756000	1765750	1.04975	0.0485558	1756898	1757314	sufE	R	General function prediction only	cysteine desufuration protein SufE
1756000	1765750	1.04975	0.0485558	1757327	1758547	sufS	E	Amino acid transport and metabolism	selenocysteine lyase
1756000	1765750	1.04975	0.0485558	1758544	1759815	sufD	-	not classify	component of SufBCD complex
1756000	1765750	1.04975	0.0485558	1759790	1760536	sufC	O	Posttranslational modification, protein turnover, chaperones	cysteine desulfurase ATPase component
1756000	1765750	1.04975	0.0485558	1760546	1762033	sufB	-	not classify	component of SufBCD complex
1756000	1765750	1.04975	0.0485558	1762042	1762410	sufA	S	Function unknown	iron-sulfur cluster assembly scaffold protein
1756000	1765750	1.04975	0.0485558	1762958	1763227	ydiH	-	not classify	hypothetical protein
1756000	1765750	1.04975	0.0485558	1763246	1763656	ydiI	Q	Secondary metabolites biosynthesis, transport and catabolism	hypothetical protein
1756000	1765750	1.04975	0.0485558	1763653	1766709	ydiJ	C	Energy production and conversion	predicted FAD-linked oxidoreductase
2380000	2381000	1.04964	0.0484435	2379630	2380547	elaC	R	General function prediction only	ribonuclease Z
2380000	2381000	1.04964	0.0484435	2380735	2381946	elaD	-	not classify	predicted enzyme
1392875	1398125	1.04864	0.0474904	1397745	1398260	ogt	L	DNA replication, recombination and repair	O-6-alkylguanine-DNA:cysteine-protein methyltransferase
1463625	1467875	1.04742	0.0463294	1467382	1468533	insI-2	L	DNA replication, recombination and repair	IS30 transposase
3504250	3505750	1.04736	0.0462765	3504054	3505358	yhfT	-	not classify	predicted inner membrane protein
3504250	3505750	1.04736	0.0462765	3505370	3505723	yhfU	-	not classify	hypothetical protein
3504250	3505750	1.04736	0.0462765	3505734	3506612	php	R	General function prediction only	predicted hydrolase
3661500	3662000	1.046	0.0449747	3658437	3661550	mdtF	V	Defense mechanisms	multidrug transporter, RpoS-dependent
3661500	3662000	1.046	0.0449747	3661913	3662641	gadW	-	not classify	DNA-binding transcriptional activator
4439000	4439500	1.04572	0.0447089	4437895	4439238	ytfL	R	General function prediction only	predicted inner membrane protein
1688625	1689375	1.04452	0.0435591	1687876	1689384	ydgA	S	Function unknown	hypothetical protein
663875	667875	1.04353	0.0426068	663325	664413	rlpA	M	Cell envelope biogenesis, outer membrane	minor lipoprotein
663875	667875	1.04353	0.0426068	664424	665536	mrdB	-	not classify	cell wall shape-determining protein
663875	667875	1.04353	0.0426068	665539	667440	mrdA	M	Cell envelope biogenesis, outer membrane	transpeptidase involved in peptidoglycan synthesis (penicillin-binding protein 2)
663875	667875	1.04353	0.0426068	667471	667938	ybeA	S	Function unknown	hypothetical protein
4383000	4384250	1.04193	0.0410784	4381862	4383364	yjeM	E	Amino acid transport and metabolism	predicted transporter
4383000	4384250	1.04193	0.0410784	4383416	4383730	yjeN	-	not classify	hypothetical protein
4383000	4384250	1.04193	0.0410784	4383727	4384041	yjeO	-	not classify	conserved inner membrane protein
4383000	4384250	1.04193	0.0410784	4384070	4387393	yjeP	M	Cell envelope biogenesis, outer membrane	predicted mechanosensitive channel
1830625	1831375	1.04123	0.040403	1830452	1831258	xthA	L	DNA replication, recombination and repair	exonuclease III
3178625	3179375	1.0395	0.0387374	3178443	3179603	ygiC	-	not classify	predicted enzyme
4028875	4032375	1.03945	0.0386912	4026805	4028994	fadB	I	Lipid metabolism	fused 3-hydroxybutyryl-CoA epimerase/delta(3)-cis-delta(2)-trans-enoyl-CoA isomerase/enoyl-CoA hydratase/3-hydroxyacyl-CoA dehydrogenase
4028875	4032375	1.03945	0.0386912	4029184	4030515	pepQ	E	Amino acid transport and metabolism	proline dipeptidase
4028875	4032375	1.03945	0.0386912	4030515	4031129	yigZ	S	Function unknown	predicted elongation factor
4028875	4032375	1.03945	0.0386912	4031168	4032619	trkH	P	Inorganic ion transport and metabolism	potassium transporter
922250	924250	1.03904	0.0382969	922136	922456	clpS	-	not classify	ATP-dependent Clp protease adaptor protein ClpS
922250	924250	1.03904	0.0382969	922487	924763	clpA	O	Posttranslational modification, protein turnover, chaperones	ATPase and specificity subunit of ClpA-ClpP ATP-dependent serine protease, chaperone activity
3311875	3313875	1.03902	0.0382764	3311364	3314036	infB	J	Translation, ribosomal structure and biogenesis	translation initiation factor IF-2
1896250	1898500	1.0386	0.0378719	1894956	1896320	sdaA	E	Amino acid transport and metabolism	L-serine deaminase I
1896250	1898500	1.0386	0.0378719	1896451	1898049	yoaD	-	not classify	predicted phosphodiesterase
1896250	1898500	1.0386	0.0378719	1898053	1899609	yoaE	R	General function prediction only	fused predicted membrane protein/conserved protein
542750	543500	1.03744	0.0367584	542485	543270	ylbA	R	General function prediction only	hypothetical protein
542750	543500	1.03744	0.0367584	543281	544516	allC	E	Amino acid transport and metabolism	N-carbamoyl-L-amino acid amidohydrolase
1082000	1083750	1.03687	0.0362045	1081466	1082593	ycdO	P	Inorganic ion transport and metabolism	hypothetical protein
1082000	1083750	1.03687	0.0362045	1082599	1083870	ycdB	P	Inorganic ion transport and metabolism	hypothetical protein
2252875	2253375	1.03648	0.0358335	2252267	2253208	rihB	F	Nucleotide transport and metabolism	ribonucleoside hydrolase 2
2435500	2436500	1.03553	0.0349115	2434737	2435873	pdxB	E	Amino acid transport and metabolism	erythronate-4-phosphate dehydrogenase
2435500	2436500	1.03553	0.0349115	2435972	2436967	flk	-	not classify	predicted flagella assembly protein
4152625	4153625	1.03546	0.0348415	4151719	4152870	argE	E	Amino acid transport and metabolism	acetylornithine deacetylase
4152625	4153625	1.03546	0.0348415	4153024	4154028	argC	E	Amino acid transport and metabolism	N-acetyl-gamma-glutamyl-phosphate reductase
3485375	3489625	1.03545	0.0348339	3484813	3486915	yhfK	S	Function unknown	conserved inner membrane protein
3485375	3489625	1.03545	0.0348339	3486982	3488202	argD	E	Amino acid transport and metabolism	bifunctional acetylornithine aminotransferase/ succinyldiaminopimelate aminotransferase
3485375	3489625	1.03545	0.0348339	3488288	3488851	pabA	H	Coenzyme metabolism	para-aminobenzoate synthase component II
3485375	3489625	1.03545	0.0348339	3488883	3489485	fic	D	Cell division and chromosome partitioning	stationary-phase protein, cell division
3485375	3489625	1.03545	0.0348339	3489475	3489642	yhfG	-	not classify	hypothetical protein
2469250	2469750	1.0349	0.0343093	2469099	2469539	yfdK	-	not classify	CPS-53 (KpLE1) prophage; conserved protein
2469250	2469750	1.0349	0.0343093	2469566	2470084	yfdL	-	not classify	CPS-53 (KpLE1) prophage; conserved protein
4269750	4272000	1.03421	0.0336393	4269072	4271894	uvrA	L	DNA replication, recombination and repair	excinuclease ABC subunit A
3505875	3507875	1.03312	0.0325848	3505734	3506612	php	R	General function prediction only	predicted hydrolase
3505875	3507875	1.03312	0.0325848	3506609	3507835	yhfW	G	Carbohydrate transport and metabolism	predicted mutase
3505875	3507875	1.03312	0.0325848	3507835	3508998	yhfX	E	Amino acid transport and metabolism	predicted amino acid racemase
546125	547875	1.03278	0.032258	545904	547571	fdrA	C	Energy production and conversion	membrane protein FdrA
1012625	1015125	1.03185	0.0313573	1012482	1014122	pqiB	R	General function prediction only	paraquat-inducible protein B
1012625	1015125	1.03185	0.0313573	1014134	1014682	ymbA	S	Function unknown	hypothetical protein
1012625	1015125	1.03185	0.0313573	1014938	1015105	rmf	-	not classify	ribosome modulation factor
2351125	2360875	1.0309	0.0304353	2350669	2352297	glpA	C	Energy production and conversion	sn-glycerol-3-phosphate dehydrogenase (anaerobic), large subunit, FAD/NAD(P)-binding
2351125	2360875	1.0309	0.0304353	2352287	2353546	glpB	E	Amino acid transport and metabolism	anaerobic glycerol-3-phosphate dehydrogenase subunit B
2351125	2360875	1.0309	0.0304353	2353543	2354733	glpC	C	Energy production and conversion	sn-glycerol-3-phosphate dehydrogenase (anaerobic), small subunit
2351125	2360875	1.0309	0.0304353	2354926	2355825	yfaD	S	Function unknown	hypothetical protein
2351125	2360875	1.0309	0.0304353	2356064	2356867	yfaU	G	Carbohydrate transport and metabolism	predicted 2,4-dihydroxyhept-2-ene-1,7-dioic acid aldolase
2351125	2360875	1.0309	0.0304353	2356885	2358174	yfaV	-	not classify	predicted transporter
2351125	2360875	1.0309	0.0304353	2358231	2359448	yfaW	R	General function prediction only	predicted enolase
2351125	2360875	1.0309	0.0304353	2359451	2360233	yfaX	K	Transcription	predicted DNA-binding transcriptional regulator
2351125	2360875	1.0309	0.0304353	2360453	2361655	yfaY	R	General function prediction only	competence damage-inducible protein A
363250	364000	1.02832	0.0279219	362455	365529	lacZ	G	Carbohydrate transport and metabolism	beta-D-galactosidase
3061750	3063000	1.02619	0.0258557	3061009	3062004	argK	E	Amino acid transport and metabolism	arginine/ornithine transport system ATPase
3061750	3063000	1.02619	0.0258557	3062015	3062800	ygfG	I	Lipid metabolism	methylmalonyl-CoA decarboxylase, biotin-independent
3061750	3063000	1.02619	0.0258557	3062824	3064302	ygfH	C	Energy production and conversion	propionyl-CoA:succinate-CoA transferase
3431500	3432750	1.02611	0.0257762	3430458	3431582	smf	U	Intracellular trafficking, secretion,and vesicular transport	hypothetical protein
3431500	3432750	1.02611	0.0257762	3431712	3432221	def	-	not classify	peptide deformylase
3431500	3432750	1.02611	0.0257762	3432236	3433183	fmt	J	Translation, ribosomal structure and biogenesis	methionyl-tRNA formyltransferase
481125	485625	1.02592	0.0255894	480478	483627	acrB	V	Defense mechanisms	multidrug efflux system protein
481125	485625	1.02592	0.0255894	483650	484843	acrA	M	Cell envelope biogenesis, outer membrane	multidrug efflux system
481125	485625	1.02592	0.0255894	484985	485632	acrR	K	Transcription	DNA-binding transcriptional repressor
3891875	3892875	1.02474	0.0244363	3892675	3893241	yieF	R	General function prediction only	chromate reductase, Class I, flavoprotein
3149750	3151000	1.0245	0.0242072	3149272	3150006	exbB	U	Intracellular trafficking, secretion,and vesicular transport	membrane spanning protein in TonB-ExbB-ExbD complex
3149750	3151000	1.0245	0.0242072	3150258	3151445	metC	E	Amino acid transport and metabolism	cystathionine beta-lyase
2192750	2194250	1.02427	0.023976	2192322	2194355	metG	R	General function prediction only	methionyl-tRNA synthetase
4505500	4508250	1.0236	0.0233217	4505489	4506640	insI-3	L	DNA replication, recombination and repair	KpLE2 phage-like element; IS30 transposase
4505500	4508250	1.0236	0.0233217	4506597	4506965	insM	L	DNA replication, recombination and repair	transposase
4505500	4508250	1.0236	0.0233217	4506981	4507577	insO-2	L	DNA replication, recombination and repair	KpLE2 phage-like element; partial transposase of insertion element IS911B
4505500	4508250	1.0236	0.0233217	4507743	4508156	yjhV	R	General function prediction only	KpLE2 phage-like element; predicted protein
2296250	2296750	1.02171	0.0214776	2295679	2296281	napC	C	Energy production and conversion	nitrate reductase, cytochrome c-type, periplasmic
2296250	2296750	1.02171	0.0214776	2296291	2296740	napB	-	not classify	nitrate reductase, small, cytochrome C550 subunit, periplasmic
2296250	2296750	1.02171	0.0214776	2296737	2297600	napH	C	Energy production and conversion	quinol dehydrogenase membrane component
4389125	4390125	1.02145	0.0212266	4388480	4389532	yjeQ	R	General function prediction only	ribosome-associated GTPase
4389125	4390125	1.02145	0.0212266	4389627	4390172	orn	A	RNA processing and modification	oligoribonuclease
2071500	2072750	1.01906	0.018878	2069563	2072682	flu	U	Intracellular trafficking, secretion,and vesicular transport	CP4-44 prophage; antigen 43 (Ag43) phase-variable biofilm formation autotransporter
3088250	3089000	1.01892	0.0187432	3087777	3088274	sprT	-	not classify	hypothetical protein
3088250	3089000	1.01892	0.0187432	3088369	3089076	endA	L	DNA replication, recombination and repair	DNA-specific endonuclease I
1778625	1779125	1.01868	0.0185121	1778425	1779363	ydiR	C	Energy production and conversion	predicted electron transfer flavoprotein, FAD-binding
3409750	3411000	1.01862	0.018445	3409675	3410559	yhdJ	L	DNA replication, recombination and repair	predicted methyltransferase
3409750	3411000	1.01862	0.018445	3410643	3410822	yhdU	-	not classify	predicted membrane protein
3409750	3411000	1.01862	0.018445	3410825	3411487	envR	K	Transcription	DNA-binding transcriptional regulator
1397250	1398000	1.01627	0.0161359	1396798	1397550	fnr	T	Signal transduction mechanism	DNA-binding transcriptional dual regulator, global regulator of anaerobic growth
1397250	1398000	1.01627	0.0161359	1397745	1398260	ogt	L	DNA replication, recombination and repair	O-6-alkylguanine-DNA:cysteine-protein methyltransferase
3411750	3412750	1.01597	0.0158417	3411886	3413043	acrE	M	Cell envelope biogenesis, outer membrane	cytoplasmic membrane lipoprotein
822250	823500	1.01596	0.01583	821721	822962	ybhO	I	Lipid metabolism	cardiolipin synthase 2
822250	823500	1.01596	0.01583	822959	823720	ybhP	R	General function prediction only	predicted DNase
1877250	1878500	1.01505	0.0149423	1877031	1877279	yeaQ	S	Function unknown	conserved inner membrane protein
1877250	1878500	1.01505	0.0149423	1877427	1877609	yoaG	-	not classify	hypothetical protein
1877250	1878500	1.01505	0.0149423	1877613	1877972	yeaR	P	Inorganic ion transport and metabolism	hypothetical protein
1877250	1878500	1.01505	0.0149423	1878145	1878783	yeaS	E	Amino acid transport and metabolism	neutral amino-acid efflux system
446000	446750	1.01453	0.014426	446039	446929	cyoE	O	Posttranslational modification, protein turnover, chaperones	protoheme IX farnesyltransferase
205000	206250	1.01434	0.0142425	204493	205089	rnhB	L	DNA replication, recombination and repair	ribonuclease HII
205000	206250	1.01434	0.0142425	205126	208608	dnaE	L	DNA replication, recombination and repair	DNA polymerase III subunit alpha
3779625	3780625	1.01402	0.0139186	3779238	3779711	yibK	J	Translation, ribosomal structure and biogenesis	predicted rRNA methylase
3779625	3780625	1.01402	0.0139186	3779764	3780585	cysE	E	Amino acid transport and metabolism	serine acetyltransferase
2069750	2072750	1.01283	0.0127456	2069563	2072682	flu	U	Intracellular trafficking, secretion,and vesicular transport	CP4-44 prophage; antigen 43 (Ag43) phase-variable biofilm formation autotransporter
1685250	1687000	1.01248	0.0124012	1684755	1686401	fumA	C	Energy production and conversion	fumarate hydratase (fumarase A), aerobic Class I
1685250	1687000	1.01248	0.0124012	1686600	1687775	manA	G	Carbohydrate transport and metabolism	mannose-6-phosphate isomerase
4499500	4500250	1.01198	0.0119084	4499283	4499612	yjgZ	-	not classify	KpLE2 phage-like element; predicted protein
4499500	4500250	1.01198	0.0119084	4500126	4501454	insG	L	DNA replication, recombination and repair	KpLE2 phage-like element; IS4 predicted transposase
4551875	4553625	1.01139	0.0113257	4550924	4552384	uxuB	-	not classify	D-mannonate oxidoreductase, NAD-binding
4551875	4553625	1.01139	0.0113257	4552599	4553372	uxuR	K	Transcription	DNA-binding transcriptional repressor
4551875	4553625	1.01139	0.0113257	4553513	4554343	yjiC	-	not classify	hypothetical protein
2232125	2233375	1.01028	0.0102264	2232055	2233293	yeiT	R	General function prediction only	predicted oxidoreductase
2232125	2233375	1.01028	0.0102264	2233287	2234522	yeiA	F	Nucleotide transport and metabolism	dihydropyrimidine dehydrogenase
383875	385625	1.00586	0.0058387	385431	386198	tauB	P	Inorganic ion transport and metabolism	taurine transporter subunit
2080000	2081000	1.00458	0.00456673	2079405	2080571	dacD	M	Cell envelope biogenesis, outer membrane	D-alanyl-D-alanine carboxypeptidase (penicillin-binding protein 6b)
2080000	2081000	1.00458	0.00456673	2080780	2082207	sbcB	L	DNA replication, recombination and repair	exonuclease I
2564375	2568875	1.00449	0.00448347	2563503	2564906	eutA	E	Amino acid transport and metabolism	reactivating factor for ethanolamine ammonia lyase
2564375	2568875	1.00449	0.00448347	2564903	2566129	eutH	-	not classify	predicted inner membrane protein
2564375	2568875	1.00449	0.00448347	2566346	2567533	eutG	C	Energy production and conversion	predicted alcohol dehydrogenase in ethanolamine utilization
2564375	2568875	1.00449	0.00448347	2567523	2568359	eutJ	E	Amino acid transport and metabolism	predicted chaperonin, ethanolamine utilization protein
2564375	2568875	1.00449	0.00448347	2568370	2569773	eutE	C	Energy production and conversion	predicted aldehyde dehydrogenase, ethanolamine utilization protein
2321500	2322250	1.00373	0.00371869	2321469	2322131	atoD	I	Lipid metabolism	acetyl-CoA:acetoacetyl-CoA transferase, alpha subunit
2321500	2322250	1.00373	0.00371869	2322131	2322781	atoA	I	Lipid metabolism	acetyl-CoA:acetoacetyl-CoA transferase, beta subunit
1543625	1544875	1.00356	0.00355293	1542782	1543738	yddK	-	not classify	hypothetical protein
1543625	1544875	1.00356	0.00355293	1543762	1544052	yddL	M	Cell envelope biogenesis, outer membrane	predicted lipoprotein
1543625	1544875	1.00356	0.00355293	1544312	1545136	yddG	-	not classify	predicted methyl viologen efflux pump
456750	458000	1.00344	0.00343192	456650	457924	clpX	O	Posttranslational modification, protein turnover, chaperones	ATP-dependent protease ATP-binding subunit
456875	457875	1.00344	0.00343191	456650	457924	clpX	O	Posttranslational modification, protein turnover, chaperones	ATP-dependent protease ATP-binding subunit
1066875	1067375	1.00295	0.00294497	1066335	1066931	wrbA	R	General function prediction only	TrpR binding protein WrbA
1066875	1067375	1.00295	0.00294497	1067304	1067477	ymdF	-	not classify	hypothetical protein
184250	186750	0.999694	-0.000306128	185978	188650	glnD	O	Posttranslational modification, protein turnover, chaperones	PII uridylyl-transferase
4582875	4585125	0.998628	-0.00137265	4581272	4584838	hsdR	V	Defense mechanisms	endonuclease R
4582875	4585125	0.998628	-0.00137265	4584972	4585886	mrr	V	Defense mechanisms	methylated adenine and cytosine restriction protein
3730000	3732500	0.996204	-0.00380341	3729154	3730146	xylF	G	Carbohydrate transport and metabolism	D-xylose transporter subunit
3730000	3732500	0.996204	-0.00380341	3730224	3731765	xylG	G	Carbohydrate transport and metabolism	fused D-xylose transporter subunits of ABC superfamily: ATP-binding components
3730000	3732500	0.996204	-0.00380341	3731743	3732924	xylH	G	Carbohydrate transport and metabolism	D-xylose transporter subunit
285000	288750	0.995762	-0.00424657	284619	286001	yagG	G	Carbohydrate transport and metabolism	CP4-6 prophage; predicted sugar transporter
285000	288750	0.995762	-0.00424657	286013	287623	yagH	G	Carbohydrate transport and metabolism	CP4-6 prophage; predicted xylosidase/arabinosidase
285000	288750	0.995762	-0.00424657	287628	288386	yagI	K	Transcription	CP4-6 prophage; predicted DNA-binding transcriptional regulator
285000	288750	0.995762	-0.00424657	288525	289529	argF	E	Amino acid transport and metabolism	CP4-6 prophage; ornithine carbamoyltransferase 2, chain F
3651750	3652750	0.995057	-0.00495555	3652706	3653236	yhiF	K	Transcription	predicted DNA-binding ranscriptional regulator
1241750	1243250	0.995049	-0.00496333	1241389	1242303	ldcA	V	Defense mechanisms	L,D-carboxypeptidase A
1241750	1243250	0.995049	-0.00496333	1242403	1243014	emtA	M	Cell envelope biogenesis, outer membrane	lytic murein endotransglycosylase E
1241750	1243250	0.995049	-0.00496333	1243016	1243750	ycgR	M	Cell envelope biogenesis, outer membrane	protein involved in flagellar function
340375	341625	0.993439	-0.00658289	340349	341731	yahJ	R	General function prediction only	deaminase
1685500	1686500	0.992755	-0.00727096	1684755	1686401	fumA	C	Energy production and conversion	fumarate hydratase (fumarase A), aerobic Class I
318625	320375	0.992175	-0.0078556	317900	319225	ykgC	C	Energy production and conversion	pyridine nucleotide-disulfide oxidoreductase
318625	320375	0.992175	-0.0078556	319451	320305	ykgD	-	not classify	predicted DNA-binding transcriptional regulator
1188125	1189375	0.992131	-0.00789981	1187539	1188999	phoQ	T	Signal transduction mechanism	sensory histidine kinase in two-compoent regulatory system with PhoP
1188125	1189375	0.992131	-0.00789981	1188999	1189670	phoP	K	Transcription	DNA-binding response regulator in two-component regulatory system with PhoQ
1329625	1335625	0.990394	-0.00965232	1329072	1331669	topA	L	DNA replication, recombination and repair	DNA topoisomerase I
1329625	1335625	0.990394	-0.00965232	1331879	1332853	cysB	K	Transcription	DNA-binding transcriptional dual regulator, O-acetyl-L-serine-binding
1329625	1335625	0.990394	-0.00965232	1333184	1333312	yciX_1	-	not classify	hypothetical protein
1329625	1335625	0.990394	-0.00965232	1333294	1333482	yciX_2	-	not classify	hypothetical protein
1329625	1335625	0.990394	-0.00965232	1333855	1336530	acnA	C	Energy production and conversion	aconitate hydratase
4600875	4602125	0.990348	-0.00969876	4600111	4600881	yjjP	S	Function unknown	predicted inner membrane protein
4600875	4602125	0.990348	-0.00969876	4601500	4602225	yjjQ	K	Transcription	predicted DNA-binding transcriptional regulator
2621125	2623375	0.990022	-0.0100277	2621066	2623132	ppk	-	not classify	polyphosphate kinase
2621125	2623375	0.990022	-0.0100277	2623137	2624678	ppx	P	Inorganic ion transport and metabolism	exopolyphosphatase
2736625	2737125	0.989117	-0.0109428	2735767	2736927	pheA	E	Amino acid transport and metabolism	fused chorismate mutase P/prephenate dehydratase
2736625	2737125	0.989117	-0.0109428	2736970	2738091	tyrA	E	Amino acid transport and metabolism	fused chorismate mutase T/prephenate dehydrogenase
623250	625500	0.988963	-0.0110982	622777	623733	fepB	P	Inorganic ion transport and metabolism	iron-enterobactin transporter subunit
623250	625500	0.988963	-0.0110982	624108	625283	entC	Q	Secondary metabolites biosynthesis, transport and catabolism	isochorismate synthase
623250	625500	0.988963	-0.0110982	625293	626903	entE	Q	Secondary metabolites biosynthesis, transport and catabolism	2,3-dihydroxybenzoate-AMP ligase component of enterobactin synthase multienzyme complex
285000	289000	0.988603	-0.0114626	284619	286001	yagG	G	Carbohydrate transport and metabolism	CP4-6 prophage; predicted sugar transporter
285000	289000	0.988603	-0.0114626	286013	287623	yagH	G	Carbohydrate transport and metabolism	CP4-6 prophage; predicted xylosidase/arabinosidase
285000	289000	0.988603	-0.0114626	287628	288386	yagI	K	Transcription	CP4-6 prophage; predicted DNA-binding transcriptional regulator
285000	289000	0.988603	-0.0114626	288525	289529	argF	E	Amino acid transport and metabolism	CP4-6 prophage; ornithine carbamoyltransferase 2, chain F
2364625	2375125	0.988404	-0.0116641	2363932	2365089	yfbE	M	Cell envelope biogenesis, outer membrane	uridine 5'-(beta-1-threo-pentapyranosyl-4-ulose diphosphate) aminotransferase, PLP-dependent
2364625	2375125	0.988404	-0.0116641	2365093	2366061	yfbF	M	Cell envelope biogenesis, outer membrane	undecaprenyl phosphate-L-Ara4FN transferase
2364625	2375125	0.988404	-0.0116641	2366061	2368043	yfbG	G	Carbohydrate transport and metabolism	hypothetical protein
2364625	2375125	0.988404	-0.0116641	2368040	2368930	yfbH	-	not classify	hypothetical protein
2364625	2375125	0.988404	-0.0116641	2368930	2370582	arnT	M	Cell envelope biogenesis, outer membrane	4-amino-4-deoxy-L-arabinose transferase
2364625	2375125	0.988404	-0.0116641	2370579	2370914	yfbW	-	not classify	hypothetical protein
2364625	2375125	0.988404	-0.0116641	2370914	2371300	yfbJ	-	not classify	hypothetical protein
2364625	2375125	0.988404	-0.0116641	2371294	2371560	pmrD	-	not classify	polymyxin resistance protein B
2364625	2375125	0.988404	-0.0116641	2371670	2373025	menE	Q	Secondary metabolites biosynthesis, transport and catabolism	O-succinylbenzoic acid--CoA ligase
2364625	2375125	0.988404	-0.0116641	2373022	2373984	menC	H	Coenzyme metabolism	O-succinylbenzoate synthase
2364625	2375125	0.988404	-0.0116641	2373984	2374841	menB	H	Coenzyme metabolism	naphthoate synthase
2364625	2375125	0.988404	-0.0116641	2374856	2375614	yfbB	R	General function prediction only	predicted peptidase
763500	764000	0.988107	-0.0119644	763403	764272	sucD	C	Energy production and conversion	succinyl-CoA synthetase subunit alpha
3529500	3530500	0.986737	-0.013352	3528737	3530461	yhgE	-	not classify	predicted inner membrane protein
146125	146625	0.985854	-0.014247	145081	146310	yadE	-	not classify	predicted polysaccharide deacetylase lipoprotein
146125	146625	0.985854	-0.014247	146314	146694	panD	-	not classify	aspartate 1-decarboxylase precursor
278500	279500	0.985657	-0.0144471	278402	278905	insB-2	L	DNA replication, recombination and repair	CP4-6 prophage; IS1 transposase InsAB'
278500	279500	0.985657	-0.0144471	278824	279099	insA-2	L	DNA replication, recombination and repair	CP4-6 prophage; IS1 repressor protein InsA
278500	279500	0.985657	-0.0144471	279248	279586	ykgN	L	DNA replication, recombination and repair	predicted IS protein
139250	145500	0.9856	-0.0145051	138835	141225	gcd	G	Carbohydrate transport and metabolism	glucose dehydrogenase
139250	145500	0.9856	-0.0145051	141431	141967	hpt	F	Nucleotide transport and metabolism	hypoxanthine-guanine phosphoribosyltransferase
139250	145500	0.9856	-0.0145051	142008	142670	can	-	not classify	carbonic anhydrase
139250	145500	0.9856	-0.0145051	142779	143705	yadG	V	Defense mechanisms	predicted transporter subunit: ATP-binding component of ABC superfamily
139250	145500	0.9856	-0.0145051	143702	144472	yadH	V	Defense mechanisms	predicted transporter subunit: membrane component of ABC superfamily
139250	145500	0.9856	-0.0145051	144577	145017	yadI	G	Carbohydrate transport and metabolism	predicted PTS Enzyme IIA
139250	145500	0.9856	-0.0145051	145081	146310	yadE	-	not classify	predicted polysaccharide deacetylase lipoprotein
1927750	1929000	0.985162	-0.014949	1928905	1930083	purT	F	Nucleotide transport and metabolism	phosphoribosylglycinamide formyltransferase 2
1957500	1959750	0.985043	-0.0150695	1957304	1957870	yecM	-	not classify	predicted metal-binding enzyme
1957500	1959750	0.985043	-0.0150695	1958086	1959819	argS	J	Translation, ribosomal structure and biogenesis	arginyl-tRNA synthetase
1370375	1371375	0.984665	-0.0154536	1369933	1371225	ycjN	G	Carbohydrate transport and metabolism	predicted sugar transporter subunit: periplasmic-binding component of ABC superfamily
1370375	1371375	0.984665	-0.0154536	1371246	1372127	ycjO	G	Carbohydrate transport and metabolism	predicted sugar transporter subunit: membrane component of ABC superfamily
2870625	2871125	0.984126	-0.0160018	2870531	2870842	ftsB	D	Cell division and chromosome partitioning	cell divison protein FtsB
2870625	2871125	0.984126	-0.0160018	2871036	2871359	ygbE	-	not classify	conserved inner membrane protein
2151875	2153875	0.983969	-0.0161614	2153287	2156409	mdtB	V	Defense mechanisms	multidrug efflux system, subunit B
[truncated: 37,659 more rows]

## Sheet: 65_0
Clone Start	Clone Stop	Fitness	ln(Fitness)	Gene Start	Gene Stop	Gene	COG	COG Name	Function
3915625	3917375	226.553	3915425	3916288	atpG	C	Energy production and conversion	F0F1 ATP synthase subunit gamma
3915625	3917375	226.553	3916339	3917880	atpA	C	Energy production and conversion	F0F1 ATP synthase subunit alpha
4462375	4462875	191.267	4461077	4462732	treC	-	not classify	trehalose-6-P hydrolase
4462375	4462875	191.267	4462782	4464203	treB	G	Carbohydrate transport and metabolism	fused trehalose(maltose)-specific PTS enzyme: IIB component/IIC component
4257375	4259375	185.832	4257260	4257469	yjbJ	S	Function unknown	predicted stress response protein
4257375	4259375	185.832	4257511	4258026	zur	P	Inorganic ion transport and metabolism	DNA-binding transcriptional repressor, Zn(II)-binding
4257375	4259375	185.832	4258344	4258598	yjbL	-	not classify	hypothetical protein
4257375	4259375	185.832	4258622	4259329	yjbM	-	not classify	hypothetical protein
128125	129125	156.431	127912	129336	lpdA	C	Energy production and conversion	dihydrolipoamide dehydrogenase
3501500	3502500	152.668	3501189	3501974	frlD	G	Carbohydrate transport and metabolism	fructoselysine 6-kinase
3501500	3502500	152.668	3502074	3502805	frlR	K	Transcription	predicted DNA-binding transcriptional regulator
4257375	4258125	150.045	4257260	4257469	yjbJ	S	Function unknown	predicted stress response protein
4257375	4258125	150.045	4257511	4258026	zur	P	Inorganic ion transport and metabolism	DNA-binding transcriptional repressor, Zn(II)-binding
1012625	1014375	139.458	1012482	1014122	pqiB	R	General function prediction only	paraquat-inducible protein B
1012625	1014375	139.458	1014134	1014682	ymbA	S	Function unknown	hypothetical protein
2088375	2089125	137.088	2088216	2089115	hisG	E	Amino acid transport and metabolism	ATP phosphoribosyltransferase
2088375	2089125	137.088	2089121	2090425	hisD	-	not classify	histidinol dehydrogenase
3033750	3034250	133.133	3033206	3034304	prfB	J	Translation, ribosomal structure and biogenesis	peptide chain release factor 2
767375	769125	120.708	767201	769834	mngB	G	Carbohydrate transport and metabolism	alpha-mannosidase
4511500	4512500	120.255	4511429	4512331	fecB	P	Inorganic ion transport and metabolism	KpLE2 phage-like element; iron-dicitrate transporter subunit
4511500	4512500	120.255	4512376	4514700	fecA	P	Inorganic ion transport and metabolism	KpLE2 phage-like element; ferric citrate outer membrane transporter
2209500	2210500	116.117	2209247	2209708	yehR	-	not classify	hypothetical protein
2209500	2210500	116.117	2209748	2210218	yehS	-	not classify	hypothetical protein
2209500	2210500	116.117	2210265	2210984	yehT	T	Signal transduction mechanism	predicted response regulator in two-component system withYehU
4257375	4257875	114.556	4257260	4257469	yjbJ	S	Function unknown	predicted stress response protein
4257375	4257875	114.556	4257511	4258026	zur	P	Inorganic ion transport and metabolism	DNA-binding transcriptional repressor, Zn(II)-binding
884125	884875	112.027	882896	884128	cmr	-	not classify	multidrug efflux system protein
884125	884875	112.027	884169	884453	ybjH	-	not classify	hypothetical protein
884125	884875	112.027	884539	885354	ybjI	R	General function prediction only	hypothetical protein
2131125	2131875	110.11	2130582	2131421	wcaA	M	Cell envelope biogenesis, outer membrane	predicted glycosyl transferase
2131125	2131875	110.11	2131514	2133676	wzc	M	Cell envelope biogenesis, outer membrane	protein-tyrosine kinase
2209375	2210625	109.026	2209247	2209708	yehR	-	not classify	hypothetical protein
2209375	2210625	109.026	2209748	2210218	yehS	-	not classify	hypothetical protein
2209375	2210625	109.026	2210265	2210984	yehT	T	Signal transduction mechanism	predicted response regulator in two-component system withYehU
3033625	3034375	106.624	3033206	3034304	prfB	J	Translation, ribosomal structure and biogenesis	peptide chain release factor 2
1247500	1248750	104.212	1246919	1248337	dhaH	S	Function unknown	fused predicted dihydroxyacetone-specific PTS enzymes: HPr component/EI component
1247500	1248750	104.212	1248348	1248980	dhaL	G	Carbohydrate transport and metabolism	dihydroxyacetone kinase, C-terminal domain
827125	828625	97.4802	826468	828204	ybhF	V	Defense mechanisms	fused predicted transporter subunits of ABC superfamily: ATP-binding components
827125	828625	97.4802	828197	829195	ybhG	M	Cell envelope biogenesis, outer membrane	hypothetical protein
179125	179875	89.1032	178455	179153	pfs	F	Nucleotide transport and metabolism	5'-methylthioadenosine/S-adenosylhomocysteine nucleosidase
179125	179875	89.1032	179237	180754	dgt	F	Nucleotide transport and metabolism	deoxyguanosinetriphosphate triphosphohydrolase
827125	828875	86.1872	826468	828204	ybhF	V	Defense mechanisms	fused predicted transporter subunits of ABC superfamily: ATP-binding components
827125	828875	86.1872	828197	829195	ybhG	M	Cell envelope biogenesis, outer membrane	hypothetical protein
2756375	2757125	85.5147	2755666	2756622	yfjH	-	not classify	CP4-57 prophage; predicted protein
2756375	2757125	85.5147	2756666	2756878	alpA	K	Transcription	CP4-57 prophage; DNA-binding transcriptional activator
2756375	2757125	85.5147	2757007	2758416	yfjI	-	not classify	CP4-57 prophage; predicted protein
1796000	1797000	81.7263	1795983	1796966	pheS	J	Translation, ribosomal structure and biogenesis	phenylalanyl-tRNA synthetase alpha subunit
4456250	4456750	78.1411	4455982	4457334	pmbA	R	General function prediction only	predicted peptidase required for the maturation and secretion of the antibiotic peptide MccB17
1300750	1302000	73.5362	1299206	1300837	oppA	E	Amino acid transport and metabolism	oligopeptide transporter subunit
1300750	1302000	73.5362	1300923	1301843	oppB	P	Inorganic ion transport and metabolism	oligopeptide permease ABC transporter membrane protein
1300750	1302000	73.5362	1301858	1302766	oppC	P	Inorganic ion transport and metabolism	oligopeptide transporter subunit
964000	965000	71.6396	963543	965807	ycaI	R	General function prediction only	conserved inner membrane protein
1300875	1301875	67.3368	1301858	1302766	oppC	P	Inorganic ion transport and metabolism	oligopeptide transporter subunit
4426375	4427125	66.3072	4426102	4426740	ytfB	M	Cell envelope biogenesis, outer membrane	predicted cell envelope opacity-associated protein
4426375	4427125	66.3072	4426958	4427578	fklB	O	Posttranslational modification, protein turnover, chaperones	FKBP-type peptidyl-prolyl cis-trans isomerase (rotamase)
820500	821750	64.7053	820016	820729	ybhM	R	General function prediction only	conserved inner membrane protein
820500	821750	64.7053	820765	821721	ybhN	S	Function unknown	conserved inner membrane protein
820500	821750	64.7053	821721	822962	ybhO	I	Lipid metabolism	cardiolipin synthase 2
3470250	3472250	64.5557	3469422	3471536	fusA	J	Translation, ribosomal structure and biogenesis	elongation factor EF-2
3470250	3472250	64.5557	3471564	3472103	rpsG	J	Translation, ribosomal structure and biogenesis	30S ribosomal protein S7
3470250	3472250	64.5557	3472200	3472574	rpsL	-	not classify	30S ribosomal protein S12
963875	965125	63.9442	963543	965807	ycaI	R	General function prediction only	conserved inner membrane protein
1103375	1104875	63.3277	1103174	1103629	csgB	-	not classify	curlin nucleator protein, minor subunit in curli complex
1103375	1104875	63.3277	1103670	1104125	csgA	-	not classify	cryptic curlin major subunit
1103375	1104875	63.3277	1104184	1104516	csgC	-	not classify	predicted curli production protein
1103375	1104875	63.3277	1104637	1104948	ymdA	-	not classify	hypothetical protein
2023875	2024875	62.6543	2023535	2024350	yedP	R	General function prediction only	hypothetical protein
2023875	2024875	62.6543	2024347	2026041	yedQ	-	not classify	predicted diguanylate cyclase
4241625	4243125	62.2501	4241554	4243098	malF	G	Carbohydrate transport and metabolism	maltose transporter subunit
899750	901250	60.4467	899067	899798	artJ	T	Signal transduction mechanism	arginine transporter subunit
899750	901250	60.4467	900089	900757	artM	E	Amino acid transport and metabolism	arginine transporter subunit
899750	901250	60.4467	900757	901473	artQ	E	Amino acid transport and metabolism	arginine transporter subunit
2666625	2667625	59.7635	2666028	2666918	hcaR	K	Transcription	DNA-binding transcriptional activator of 3-phenylpropionic acid catabolism
2666625	2667625	59.7635	2667054	2668415	hcaE	R	General function prediction only	3-phenylpropionate dioxygenase, large (alpha) subunit
1571000	1572750	56.112	1570431	1573226	pqqL	R	General function prediction only	predicted peptidase
3020625	3021125	55.2834	3019338	3022208	xdhD	C	Energy production and conversion	fused predicted xanthine/hypoxanthine oxidase: molybdopterin-binding subunit/Fe-S binding subunit
3471500	3472250	55.0711	3469422	3471536	fusA	J	Translation, ribosomal structure and biogenesis	elongation factor EF-2
3471500	3472250	55.0711	3471564	3472103	rpsG	J	Translation, ribosomal structure and biogenesis	30S ribosomal protein S7
3471500	3472250	55.0711	3472200	3472574	rpsL	-	not classify	30S ribosomal protein S12
4063500	4064000	54.9974	4062386	4063789	yihO	G	Carbohydrate transport and metabolism	predited transporter
4063500	4064000	54.9974	4063832	4065238	yihP	G	Carbohydrate transport and metabolism	predicted transporter
809750	810750	54.4039	809604	810758	bioF	H	Coenzyme metabolism	8-amino-7-oxononanoate synthase
809750	810750	54.4039	810745	811500	bioC	R	General function prediction only	predicted methltransferase, enzyme of biotin synthesis
2417500	2418000	54.2754	2417256	2417810	yfcE	R	General function prediction only	phosphodiesterase
2417500	2418000	54.2754	2417863	2418507	yfcF	O	Posttranslational modification, protein turnover, chaperones	predicted enzyme
1098875	1099625	54.1614	1098863	1099417	ycdY	R	General function prediction only	hypothetical protein
1098875	1099625	54.1614	1099519	1100010	ycdZ	-	not classify	predicted inner membrane protein
1062625	1063125	50.9819	1062078	1062998	cbpA	O	Posttranslational modification, protein turnover, chaperones	curved DNA-binding protein, DnaJ homologue that functions as a co-chaperone of DnaK
2935875	2937125	50.7576	2935460	2936908	fucK	G	Carbohydrate transport and metabolism	L-fuculokinase
2935875	2937125	50.7576	2936910	2937332	fucU	G	Carbohydrate transport and metabolism	L-fucose mutarotase
3090750	3092250	49.6871	3089900	3090850	gshB	J	Translation, ribosomal structure and biogenesis	glutathione synthetase
3090750	3092250	49.6871	3090959	3091522	yqgE	K	Transcription	hypothetical protein
3090750	3092250	49.6871	3091522	3091938	yqgF	-	not classify	Holliday junction resolvase-like protein
3090750	3092250	49.6871	3092122	3093102	yggR	U	Intracellular trafficking, secretion,and vesicular transport	predicted transporter
3377000	3377750	49.6067	3376892	3378019	yhcM	R	General function prediction only	conserved protein with nucleoside triphosphate hydrolase domain
2890250	2890750	48.7536	2890236	2890601	ygcM	H	Coenzyme metabolism	6-pyruvoyl tetrahydrobiopterin synthase (PTPS)
2890250	2890750	48.7536	2890679	2891950	ygcN	C	Energy production and conversion	predicted oxidoreductase with FAD/NAD(P)-binding domain
2080000	2080750	48.4713	2079405	2080571	dacD	M	Cell envelope biogenesis, outer membrane	D-alanyl-D-alanine carboxypeptidase (penicillin-binding protein 6b)
4496125	4497375	48.0086	4496618	4497523	insD-6	L	DNA replication, recombination and repair	KpLE2 phage-like element; IS2 insertion element transposase InsAB'
2145250	2146000	47.556	2144716	2145564	alkA	L	DNA replication, recombination and repair	3-methyl-adenine DNA glycosylase II
2145250	2146000	47.556	2145698	2147050	yegD	O	Posttranslational modification, protein turnover, chaperones	predicted chaperone
2324250	2325250	47.0564	2324131	2325315	atoB	I	Lipid metabolism	acetyl-CoA acetyltransferase
1999000	1999500	46.8362	1998497	1999048	fliZ	-	not classify	predicted regulator of FliA activity
1999000	1999500	46.8362	1999094	1999813	fliA	K	Transcription	flagellar biosynthesis sigma factor
2629625	2631375	46.5464	2628980	2630557	guaA	F	Nucleotide transport and metabolism	bifunctional GMP synthase/glutamine amidotransferase protein
2629625	2631375	46.5464	2630626	2632092	guaB	R	General function prediction only	inositol-5-monophosphate dehydrogenase
4293250	4294250	45.6404	4292504	4293817	gltP	C	Energy production and conversion	glutamate/aspartate:proton symporter
3285750	3286500	45.3866	3285448	3286032	yraH	U	Intracellular trafficking, secretion,and vesicular transport	predicted fimbrial-like adhesin protein
3285750	3286500	45.3866	3286112	3286807	yraI	U	Intracellular trafficking, secretion,and vesicular transport	predicted periplasmic pilin chaperone
493625	494625	45.1641	493300	493629	ybaB	S	Function unknown	hypothetical protein
493625	494625	45.1641	493629	494234	recR	L	DNA replication, recombination and repair	recombination protein RecR
493625	494625	45.1641	494344	496218	htpG	O	Posttranslational modification, protein turnover, chaperones	heat shock protein 90
2142375	2143375	44.3859	2141290	2144607	yegE	T	Signal transduction mechanism	predicted diguanylate cyclase, GGDEF domain signalling protein
2140000	2143250	44.3768	2139658	2140239	dcd	F	Nucleotide transport and metabolism	deoxycytidine triphosphate deaminase
2140000	2143250	44.3768	2140331	2140972	udk	F	Nucleotide transport and metabolism	uridine kinase
2140000	2143250	44.3768	2141290	2144607	yegE	T	Signal transduction mechanism	predicted diguanylate cyclase, GGDEF domain signalling protein
2439000	2439750	43.747	2438407	2439627	fabB	Q	Secondary metabolites biosynthesis, transport and catabolism	3-oxoacyl-(acyl carrier protein) synthase
1287500	1289000	43.6285	1287005	1287847	purU	F	Nucleotide transport and metabolism	formyltetrahydrofolate deformylase
1287500	1289000	43.6285	1287897	1288355	ychJ	S	Function unknown	hypothetical protein
1287500	1289000	43.6285	1288429	1289373	rssA	R	General function prediction only	hypothetical protein
4426500	4427000	43.2914	4426102	4426740	ytfB	M	Cell envelope biogenesis, outer membrane	predicted cell envelope opacity-associated protein
4426500	4427000	43.2914	4426958	4427578	fklB	O	Posttranslational modification, protein turnover, chaperones	FKBP-type peptidyl-prolyl cis-trans isomerase (rotamase)
368125	368625	42.7753	367835	369499	mhpA	C	Energy production and conversion	3-(3-hydroxyphenyl)propionate hydroxylase
1062500	1064500	42.4838	1062078	1062998	cbpA	O	Posttranslational modification, protein turnover, chaperones	curved DNA-binding protein, DnaJ homologue that functions as a co-chaperone of DnaK
1062500	1064500	42.4838	1063259	1064515	yccE	-	not classify	hypothetical protein
1578250	1579750	42.1259	1577657	1578814	ydeM	R	General function prediction only	hypothetical protein
1578250	1579750	42.1259	1578866	1580548	ydeN	P	Inorganic ion transport and metabolism	hypothetical protein
204875	206375	42.0192	204493	205089	rnhB	L	DNA replication, recombination and repair	ribonuclease HII
204875	206375	42.0192	205126	208608	dnaE	L	DNA replication, recombination and repair	DNA polymerase III subunit alpha
3200750	3201500	41.2849	3199913	3201151	cca	J	Translation, ribosomal structure and biogenesis	fused tRNA nucleotidyl transferase/2'3'-cyclic phosphodiesterase/2'nucleotidase and phosphatase
3200750	3201500	41.2849	3201332	3202153	uppP	-	not classify	undecaprenyl pyrophosphate phosphatase
3101375	3102375	41.2347	3101035	3102087	mutY	L	DNA replication, recombination and repair	adenine DNA glycosylase
3101375	3102375	41.2347	3102115	3102390	yggX	-	not classify	hypothetical protein
1454625	1456375	41.075	1454454	1455524	paaE	C	Energy production and conversion	predicted multicomponent oxygenase/reductase subunit for phenylacetic acid degradation
1454625	1456375	41.075	1455521	1456288	paaF	I	Lipid metabolism	enoyl-CoA hydratase-isomerase
1454625	1456375	41.075	1456288	1457076	paaG	I	Lipid metabolism	enoyl-CoA hydratase
4376000	4377250	40.9738	4375834	4376967	ampC	V	Defense mechanisms	beta-lactamase/D-alanine carboxypeptidase
4376000	4377250	40.9738	4377030	4377389	frdD	-	not classify	fumarate reductase subunit D
1761125	1762375	40.0126	1760546	1762033	sufB	-	not classify	component of SufBCD complex
1761125	1762375	40.0126	1762042	1762410	sufA	S	Function unknown	iron-sulfur cluster assembly scaffold protein
1094500	1095000	39.9715	1094361	1094669	insE-4	-	not classify	IS3 element protein InsE
1094500	1095000	39.9715	1094767	1095069	ymdE	I	Lipid metabolism	hypothetical protein
1539250	1540250	39.2062	1536874	1540614	narZ	C	Energy production and conversion	nitrate reductase 2 (NRZ), alpha subunit
4625000	4626000	38.7849	4623935	4625317	radA	O	Posttranslational modification, protein turnover, chaperones	predicted repair protein
4625000	4626000	38.7849	4625338	4626570	nadR	H	Coenzyme metabolism	nicotinamide-nucleotide adenylyltransferase
2926375	2927375	38.6794	2926251	2927540	sdaC	E	Amino acid transport and metabolism	predicted serine transporter
3085875	3086625	38.3205	3084728	3085882	metK	H	Coenzyme metabolism	S-adenosylmethionine synthetase
3085875	3086625	38.3205	3086306	3087700	galP	-	not classify	D-galactose transporter
15250	16250	38.2645	14168	15298	dnaJ	O	Posttranslational modification, protein turnover, chaperones	chaperone Hsp40, co-chaperone with DnaK
15250	16250	38.2645	15445	16557	insL-1	L	DNA replication, recombination and repair	IS186/IS421 transposase
4269750	4272000	38.0398	4269072	4271894	uvrA	L	DNA replication, recombination and repair	excinuclease ABC subunit A
1406250	1407250	37.889	1406074	1407057	ydaN	P	Inorganic ion transport and metabolism	zinc transporter
3958250	3959750	37.8417	3958035	3958310	yifO	S	Function unknown	hypothetical protein
3958250	3959750	37.8417	3958265	3958483	yifN	S	Function unknown	conserved protein (pseudogene)
3958250	3959750	37.8417	3958700	3960721	rep	L	DNA replication, recombination and repair	DNA helicase and single-stranded DNA-dependent ATPase
4229125	4229875	37.794	4228377	4229249	yjbC	J	Translation, ribosomal structure and biogenesis	23S rRNA pseudouridine synthase
4229125	4229875	37.794	4229382	4229654	yjbD	-	not classify	hypothetical protein
2614000	2614750	37.637	2614116	2615579	yfgC	R	General function prediction only	predicted peptidase
1501250	1502000	36.2962	1501681	1502889	ydcM	L	DNA replication, recombination and repair	predicted transposase
15250	16000	36.2241	14168	15298	dnaJ	O	Posttranslational modification, protein turnover, chaperones	chaperone Hsp40, co-chaperone with DnaK
15250	16000	36.2241	15445	16557	insL-1	L	DNA replication, recombination and repair	IS186/IS421 transposase
3901875	3902875	35.7053	3901743	3903620	bglF	G	Carbohydrate transport and metabolism	fused beta-glucoside-specific PTS enzymes: IIA component/IIB component/IIC component
4441875	4443375	35.699	4440405	4442138	ytfM	M	Cell envelope biogenesis, outer membrane	predicted outer membrane protein and surface antigen
4441875	4443375	35.699	4442135	4445914	ytfN	S	Function unknown	hypothetical protein
2252875	2253625	35.6246	2252267	2253208	rihB	F	Nucleotide transport and metabolism	ribonucleoside hydrolase 2
2252875	2253625	35.6246	2253377	2254036	yeiL	T	Signal transduction mechanism	DNA-binding transcriptional activator of stationary phase nitrogen survival
2630875	2631375	35.3831	2630626	2632092	guaB	R	General function prediction only	inositol-5-monophosphate dehydrogenase
640875	641625	35.3726	640662	641090	uspG	T	Signal transduction mechanism	universal stress protein UP12
640875	641625	35.3726	641311	642549	ybdR	R	General function prediction only	predicted oxidoreductase, Zn-dependent and NAD(P)-binding
1012625	1014125	35.3029	1012482	1014122	pqiB	R	General function prediction only	paraquat-inducible protein B
3740000	3741250	35.2173	3739707	3740555	yiaJ	K	Transcription	predicted DNA-binding transcriptional repressor
3740000	3741250	35.2173	3740756	3741754	yiaK	-	not classify	2,3-diketo-L-gulonate dehydrogenase, NADH-dependent
3401500	3402250	35.2105	3401506	3402480	yhdH	R	General function prediction only	predicted oxidoreductase, Zn-dependent and NAD(P)-binding
3254750	3256000	35.1412	3254701	3255969	yhaO	E	Amino acid transport and metabolism	predicted transporter
1393625	1395625	35.0055	1392915	1393946	ynaI	M	Cell envelope biogenesis, outer membrane	conserved inner membrane protein
1393625	1395625	35.0055	1394100	1395116	insH-4	L	DNA replication, recombination and repair	IS5 transposase and trans-activator
1393625	1395625	35.0055	1395389	1395646	ynaJ	-	not classify	predicted inner membrane protein
2597500	2598250	34.6618	2596904	2597782	dapA	M	Cell envelope biogenesis, outer membrane	dihydrodipicolinate synthase
2597500	2598250	34.6618	2597928	2598500	gcvR	E	Amino acid transport and metabolism	DNA-binding transcriptional repressor, regulatory protein accessory to GcvA
1049250	1050000	34.6474	1049056	1049331	insA-4	L	DNA replication, recombination and repair	IS1 repressor protein InsA
1049250	1050000	34.6474	1049250	1049753	insB-4	L	DNA replication, recombination and repair	IS1 transposase InsAB'
1690375	1691625	33.9111	1689610	1690875	uidC	-	not classify	predicted outer membrane porin protein
1690375	1691625	33.9111	1690914	1692287	uidB	G	Carbohydrate transport and metabolism	glucuronide transporter
4370625	4371375	33.7863	4369048	4370694	groEL	O	Posttranslational modification, protein turnover, chaperones	chaperonin GroEL
4370625	4371375	33.7863	4370832	4371185	yjeI	-	not classify	hypothetical protein
2629500	2631500	33.5612	2628980	2630557	guaA	F	Nucleotide transport and metabolism	bifunctional GMP synthase/glutamine amidotransferase protein
2629500	2631500	33.5612	2630626	2632092	guaB	R	General function prediction only	inositol-5-monophosphate dehydrogenase
319875	320375	33.4923	319451	320305	ykgD	-	not classify	predicted DNA-binding transcriptional regulator
202875	203375	33.1635	202560	203348	lpxA	M	Cell envelope biogenesis, outer membrane	UDP-N-acetylglucosamine acyltransferase
202875	203375	33.1635	203348	204496	lpxB	M	Cell envelope biogenesis, outer membrane	lipid-A-disaccharide synthase
1690250	1691750	33.0901	1689610	1690875	uidC	-	not classify	predicted outer membrane porin protein
1690250	1691750	33.0901	1690914	1692287	uidB	G	Carbohydrate transport and metabolism	glucuronide transporter
4423625	4425625	32.9608	4423543	4423857	priB	L	DNA replication, recombination and repair	primosomal replication protein N
4423625	4425625	32.9608	4423862	4424089	rpsR	-	not classify	30S ribosomal protein S18
4423625	4425625	32.9608	4424131	4424580	rplI	J	Translation, ribosomal structure and biogenesis	50S ribosomal protein L9
4423625	4425625	32.9608	4424651	4425445	yjfZ	-	not classify	hypothetical protein
4413750	4414250	32.7324	4412298	4413923	aidB	I	Lipid metabolism	isovaleryl CoA dehydrogenase
4413750	4414250	32.7324	4414040	4414315	yjfN	-	not classify	hypothetical protein
1162500	1163000	32.6297	1161861	1162502	ycfM	R	General function prediction only	predicted outer membrane lipoprotein
1162500	1163000	32.6297	1162483	1163307	ycfN	M	Cell envelope biogenesis, outer membrane	thiamin kinase
368125	368875	32.5792	367835	369499	mhpA	C	Energy production and conversion	3-(3-hydroxyphenyl)propionate hydroxylase
2245625	2246875	32.3956	2245085	2246554	lysP	E	Amino acid transport and metabolism	lysine transporter
2245625	2246875	32.3956	2246759	2247640	yeiE	K	Transcription	predicted DNA-binding transcriptional regulator
2252750	2254000	32.3772	2252267	2253208	rihB	F	Nucleotide transport and metabolism	ribonucleoside hydrolase 2
2252750	2254000	32.3772	2253377	2254036	yeiL	T	Signal transduction mechanism	DNA-binding transcriptional activator of stationary phase nitrogen survival
1886250	1887750	32.3603	1886085	1887770	fadD	Q	Secondary metabolites biosynthesis, transport and catabolism	acyl-CoA synthase
3925125	3926125	32.2983	3925178	3926170	asnA	E	Amino acid transport and metabolism	asparagine synthetase AsnA
448500	450250	32.2871	447874	449865	cyoB	C	Energy production and conversion	cytochrome o ubiquinol oxidase subunit I
448500	450250	32.2871	449887	450834	cyoA	C	Energy production and conversion	cytochrome o ubiquinol oxidase subunit II
4088875	4090625	32.2768	4087878	4088948	frvX	G	Carbohydrate transport and metabolism	predicted endo-1,4-beta-glucanase
4088875	4090625	32.2768	4088938	4090389	frvB	G	Carbohydrate transport and metabolism	fused predicted PTS enzymes: IIB component/IIC component
4088875	4090625	32.2768	4090400	4090846	frvA	T	Signal transduction mechanism	predicted enzyme IIA component of PTS
3471375	3472375	32.2078	3469422	3471536	fusA	J	Translation, ribosomal structure and biogenesis	elongation factor EF-2
3471375	3472375	32.2078	3471564	3472103	rpsG	J	Translation, ribosomal structure and biogenesis	30S ribosomal protein S7
3471375	3472375	32.2078	3472200	3472574	rpsL	-	not classify	30S ribosomal protein S12
531250	533000	32.1935	530519	531445	ybbS	K	Transcription	DNA-binding transcriptional activator of the allD operon
531250	533000	32.1935	531675	532157	allA	F	Nucleotide transport and metabolism	ureidoglycolate hydrolase
531250	533000	32.1935	532235	533050	allR	K	Transcription	DNA-binding transcriptional repressor
305000	306500	32.0842	304398	306041	yagW	-	not classify	predicted receptor
305000	306500	32.0842	306031	308556	yagX	-	not classify	predicted aromatic compound dioxygenase
2349875	2350875	32.0804	2349038	2350396	glpT	G	Carbohydrate transport and metabolism	sn-glycerol-3-phosphate transporter
2349875	2350875	32.0804	2350669	2352297	glpA	C	Energy production and conversion	sn-glycerol-3-phosphate dehydrogenase (anaerobic), large subunit, FAD/NAD(P)-binding
1454625	1455875	32.0282	1454454	1455524	paaE	C	Energy production and conversion	predicted multicomponent oxygenase/reductase subunit for phenylacetic acid degradation
1454625	1455875	32.0282	1455521	1456288	paaF	I	Lipid metabolism	enoyl-CoA hydratase-isomerase
1062625	1063375	32.0261	1062078	1062998	cbpA	O	Posttranslational modification, protein turnover, chaperones	curved DNA-binding protein, DnaJ homologue that functions as a co-chaperone of DnaK
1062625	1063375	32.0261	1063259	1064515	yccE	-	not classify	hypothetical protein
1993375	1993875	31.9966	1992727	1993383	uvrY	K	Transcription	response regulator
1993375	1993875	31.9966	1993842	1994066	yecF	-	not classify	hypothetical protein
2353250	2354750	31.6621	2352287	2353546	glpB	E	Amino acid transport and metabolism	anaerobic glycerol-3-phosphate dehydrogenase subunit B
2353250	2354750	31.6621	2353543	2354733	glpC	C	Energy production and conversion	sn-glycerol-3-phosphate dehydrogenase (anaerobic), small subunit
4277875	4279375	31.6382	4278003	4279652	yjcE	P	Inorganic ion transport and metabolism	predicted cation/proton antiporter
2750250	2751500	31.5546	2749817	2751478	recN	L	DNA replication, recombination and repair	recombination and repair protein
988500	990250	31.2241	988377	989579	pncB	H	Coenzyme metabolism	nicotinate phosphoribosyltransferase
988500	990250	31.2241	989845	992457	pepN	E	Amino acid transport and metabolism	aminopeptidase N
2145250	2147000	31.1171	2144716	2145564	alkA	L	DNA replication, recombination and repair	3-methyl-adenine DNA glycosylase II
2145250	2147000	31.1171	2145698	2147050	yegD	O	Posttranslational modification, protein turnover, chaperones	predicted chaperone
2597375	2598375	30.924	2596904	2597782	dapA	M	Cell envelope biogenesis, outer membrane	dihydrodipicolinate synthase
2597375	2598375	30.924	2597928	2598500	gcvR	E	Amino acid transport and metabolism	DNA-binding transcriptional repressor, regulatory protein accessory to GcvA
387125	388375	30.7184	387019	387870	tauD	Q	Secondary metabolites biosynthesis, transport and catabolism	taurine dioxygenase
387125	388375	30.7184	387977	388951	hemB	-	not classify	delta-aminolevulinic acid dehydratase
2078125	2079375	30.6468	2077557	2078615	yeeA	S	Function unknown	conserved inner membrane protein
2078125	2079375	30.6468	2078813	2079286	sbmC	L	DNA replication, recombination and repair	DNA gyrase inhibitor
2488125	2489375	30.6453	2487264	2488208	yfdV	R	General function prediction only	predicted transporter
2488125	2489375	30.6453	2488278	2489972	yfdU	H	Coenzyme metabolism	hypothetical protein
593125	594625	30.151	592551	593993	cusS	T	Signal transduction mechanism	sensory histidine kinase in two-component regulatory system with CusR, senses copper ions
593125	594625	30.151	593983	594666	cusR	K	Transcription	DNA-binding response regulator in two-component regulatory system with CusS
2334000	2335250	29.7878	2332978	2334666	yfaA	S	Function unknown	hypothetical protein
2334000	2335250	29.7878	2334815	2337442	gyrA	L	DNA replication, recombination and repair	DNA gyrase subunit A
1894625	1895375	29.6945	1894194	1894772	yeaB	-	not classify	predicted NUDIX hydrolase
1894625	1895375	29.6945	1894956	1896320	sdaA	E	Amino acid transport and metabolism	L-serine deaminase I
3460750	3461500	29.5666	3460366	3460953	gspJ	U	Intracellular trafficking, secretion,and vesicular transport	predicted general secretory pathway component, cryptic
3460750	3461500	29.5666	3460946	3461929	gspK	U	Intracellular trafficking, secretion,and vesicular transport	general secretory pathway component, cryptic
4547625	4548125	29.5524	4546831	4547733	fimH	-	not classify	minor component of type 1 fimbriae
4547625	4548125	29.5524	4547976	4549319	gntP	E	Amino acid transport and metabolism	fructuronate transporter
1148000	1148750	29.3774	1147982	1148935	fabH	I	Lipid metabolism	3-oxoacyl-(acyl carrier protein) synthase
3854625	3855375	29.2291	3854438	3854887	yidI	-	not classify	predicted inner membrane protein
3854625	3855375	29.2291	3854934	3856427	yidJ	P	Inorganic ion transport and metabolism	predicted sulfatase/phosphatase
3507250	3508000	29.1947	3506609	3507835	yhfW	G	Carbohydrate transport and metabolism	predicted mutase
3507250	3508000	29.1947	3507835	3508998	yhfX	E	Amino acid transport and metabolism	predicted amino acid racemase
4101750	4103000	28.9776	4101625	4102998	cpxA	T	Signal transduction mechanism	two-component sensor protein
4101750	4103000	28.9776	4102995	4103693	cpxR	K	Transcription	DNA-binding response regulator in two-component regulatory system with CpxA
1062500	1063500	28.9239	1062078	1062998	cbpA	O	Posttranslational modification, protein turnover, chaperones	curved DNA-binding protein, DnaJ homologue that functions as a co-chaperone of DnaK
1062500	1063500	28.9239	1063259	1064515	yccE	-	not classify	hypothetical protein
2846000	2848250	28.9044	2845437	2847263	hycC	P	Inorganic ion transport and metabolism	NADH dehydrogenase subunit N
2846000	2848250	28.9044	2847260	2847871	hycB	C	Energy production and conversion	hydrogenase 3, Fe-S subunit
2846000	2848250	28.9044	2847996	2848457	hycA	-	not classify	regulator of the transcriptional regulator FhlA
2024125	2024875	28.8985	2023535	2024350	yedP	R	General function prediction only	hypothetical protein
2024125	2024875	28.8985	2024347	2026041	yedQ	-	not classify	predicted diguanylate cyclase
3958250	3959500	28.5839	3958035	3958310	yifO	S	Function unknown	hypothetical protein
3958250	3959500	28.5839	3958265	3958483	yifN	S	Function unknown	conserved protein (pseudogene)
3958250	3959500	28.5839	3958700	3960721	rep	L	DNA replication, recombination and repair	DNA helicase and single-stranded DNA-dependent ATPase
1874875	1875875	28.5206	1873697	1874878	yeaN	P	Inorganic ion transport and metabolism	predicted transporter
1874875	1875875	28.5206	1874933	1875280	yeaO	S	Function unknown	hypothetical protein
1874875	1875875	28.5206	1875302	1875556	yoaF	R	General function prediction only	conserved outer membrane protein
1874875	1875875	28.5206	1875739	1876764	yeaP	-	not classify	predicted diguanylate cyclase
1148000	1149000	28.4588	1147982	1148935	fabH	I	Lipid metabolism	3-oxoacyl-(acyl carrier protein) synthase
1148000	1149000	28.4588	1148951	1149880	fabD	I	Lipid metabolism	acyl carrier protein S-malonyltransferase
4631250	4631750	28.3464	4631256	4631768	yjjX	-	not classify	NTPase
542875	543625	28.211	542485	543270	ylbA	R	General function prediction only	hypothetical protein
542875	543625	28.211	543281	544516	allC	E	Amino acid transport and metabolism	N-carbamoyl-L-amino acid amidohydrolase
382625	383625	28.166	381963	383159	yaiP	M	Cell envelope biogenesis, outer membrane	predicted glucosyltransferase
382625	383625	28.166	383283	383840	yaiS	S	Function unknown	hypothetical protein
4028875	4030125	27.9045	4026805	4028994	fadB	I	Lipid metabolism	fused 3-hydroxybutyryl-CoA epimerase/delta(3)-cis-delta(2)-trans-enoyl-CoA isomerase/enoyl-CoA hydratase/3-hydroxyacyl-CoA dehydrogenase
4028875	4030125	27.9045	4029184	4030515	pepQ	E	Amino acid transport and metabolism	proline dipeptidase
417625	418375	27.7162	417113	418408	phoR	T	Signal transduction mechanism	sensory histidine kinase in two-component regulatory system with PhoB
1610875	1612125	27.6524	1610349	1611275	yneH	-	not classify	predicted glutaminase
1610875	1612125	27.6524	1611339	1612727	yneI	C	Energy production and conversion	predicted aldehyde dehydrogenase
4028875	4030375	27.6349	4026805	4028994	fadB	I	Lipid metabolism	fused 3-hydroxybutyryl-CoA epimerase/delta(3)-cis-delta(2)-trans-enoyl-CoA isomerase/enoyl-CoA hydratase/3-hydroxyacyl-CoA dehydrogenase
4028875	4030375	27.6349	4029184	4030515	pepQ	E	Amino acid transport and metabolism	proline dipeptidase
998375	1002375	27.4928	997713	998414	ycbR	U	Intracellular trafficking, secretion,and vesicular transport	predicted periplasmic pilin chaperone
998375	1002375	27.4928	998439	1001039	ycbS	U	Intracellular trafficking, secretion,and vesicular transport	predicted outer membrane usher protein
998375	1002375	27.4928	1001030	1002100	ycbT	-	not classify	predicted fimbrial-like adhesin protein
998375	1002375	27.4928	1002112	1002654	ycbU	U	Intracellular trafficking, secretion,and vesicular transport	predicted fimbrial-like adhesin protein
699375	699875	27.3061	698797	699549	nagD	G	Carbohydrate transport and metabolism	UMP phosphatase
699375	699875	27.3061	699597	700817	nagC	G	Carbohydrate transport and metabolism	DNA-binding transcriptional dual regulator, repressor of N-acetylglucosamine
2353375	2354625	27.1857	2352287	2353546	glpB	E	Amino acid transport and metabolism	anaerobic glycerol-3-phosphate dehydrogenase subunit B
2353375	2354625	27.1857	2353543	2354733	glpC	C	Energy production and conversion	sn-glycerol-3-phosphate dehydrogenase (anaerobic), small subunit
3972000	3973000	27.0816	3971631	3972512	rffH	M	Cell envelope biogenesis, outer membrane	glucose-1-phosphate thymidylyltransferase
3972000	3973000	27.0816	3972619	3973164	rffC	-	not classify	TDP-fucosamine acetyltransferase
2890250	2891000	27.0815	2890236	2890601	ygcM	H	Coenzyme metabolism	6-pyruvoyl tetrahydrobiopterin synthase (PTPS)
2890250	2891000	27.0815	2890679	2891950	ygcN	C	Energy production and conversion	predicted oxidoreductase with FAD/NAD(P)-binding domain
2023875	2026625	26.9853	2023535	2024350	yedP	R	General function prediction only	hypothetical protein
2023875	2026625	26.9853	2024347	2026041	yedQ	-	not classify	predicted diguanylate cyclase
2023875	2026625	26.9853	2026212	2026394	yodC	S	Function unknown	hypothetical protein
2023875	2026625	26.9853	2026473	2027390	yedI	S	Function unknown	conserved inner membrane protein
3310125	3310625	26.8293	3309855	3310799	truB	J	Translation, ribosomal structure and biogenesis	tRNA pseudouridine synthase B
834500	835250	26.743	834471	835433	ybiB	E	Amino acid transport and metabolism	hypothetical protein
3507375	3507875	26.5432	3506609	3507835	yhfW	G	Carbohydrate transport and metabolism	predicted mutase
3507375	3507875	26.5432	3507835	3508998	yhfX	E	Amino acid transport and metabolism	predicted amino acid racemase
3603125	3603875	26.3378	3603002	3603271	yhhL	-	not classify	conserved inner membrane protein
3603125	3603875	26.3378	3603274	3603633	yhhM	-	not classify	hypothetical protein
3603125	3603875	26.3378	3603774	3604400	yhhN	S	Function unknown	conserved inner membrane protein
482875	484875	26.2605	480478	483627	acrB	V	Defense mechanisms	multidrug efflux system protein
482875	484875	26.2605	483650	484843	acrA	M	Cell envelope biogenesis, outer membrane	multidrug efflux system
2565375	2566875	26.1955	2564903	2566129	eutH	-	not classify	predicted inner membrane protein
2565375	2566875	26.1955	2566346	2567533	eutG	C	Energy production and conversion	predicted alcohol dehydrogenase in ethanolamine utilization
2438875	2439875	26.0544	2438407	2439627	fabB	Q	Secondary metabolites biosynthesis, transport and catabolism	3-oxoacyl-(acyl carrier protein) synthase
2438875	2439875	26.0544	2439786	2441792	yfcK	S	Function unknown	hypothetical protein
2145375	2145875	26.0395	2144716	2145564	alkA	L	DNA replication, recombination and repair	3-methyl-adenine DNA glycosylase II
2145375	2145875	26.0395	2145698	2147050	yegD	O	Posttranslational modification, protein turnover, chaperones	predicted chaperone
3763500	3765500	26.027	3760206	3764339	rhsA	M	Cell envelope biogenesis, outer membrane	rhsA element core protein RshA
3763500	3765500	26.027	3764360	3765202	yibA	C	Energy production and conversion	lyase containing HEAT-repeat
3763500	3765500	26.027	3765244	3765945	yibJ	M	Cell envelope biogenesis, outer membrane	predicted Rhs-family protein
2249250	2249750	25.8716	2248862	2249719	nfo	L	DNA replication, recombination and repair	endonuclease IV
2249250	2249750	25.8716	2249722	2250810	yeiI	G	Carbohydrate transport and metabolism	predicted kinase
3966000	3966500	25.5992	3965939	3967042	rfe	M	Cell envelope biogenesis, outer membrane	UDP-GlcNAc:undecaprenylphosphate GlcNAc-1-phosphate transferase
2004500	2005500	25.5381	2004180	2005667	amyA	-	not classify	cytoplasmic alpha-amylase
1454500	1457250	25.4481	1454454	1455524	paaE	C	Energy production and conversion	predicted multicomponent oxygenase/reductase subunit for phenylacetic acid degradation
1454500	1457250	25.4481	1455521	1456288	paaF	I	Lipid metabolism	enoyl-CoA hydratase-isomerase
1454500	1457250	25.4481	1456288	1457076	paaG	I	Lipid metabolism	enoyl-CoA hydratase
1454500	1457250	25.4481	1457078	1458505	paaH	I	Lipid metabolism	3-hydroxybutyryl-CoA dehydrogenase
2860375	2861375	25.2931	2860357	2861523	ygbK	S	Function unknown	hypothetical protein
2845875	2848375	25.2897	2845437	2847263	hycC	P	Inorganic ion transport and metabolism	NADH dehydrogenase subunit N
2845875	2848375	25.2897	2847260	2847871	hycB	C	Energy production and conversion	hydrogenase 3, Fe-S subunit
2845875	2848375	25.2897	2847996	2848457	hycA	-	not classify	regulator of the transcriptional regulator FhlA
1481250	1483000	25.2457	1481142	1484987	hrpA	L	DNA replication, recombination and repair	ATP-dependent helicase
2750250	2752000	25.2093	2749817	2751478	recN	L	DNA replication, recombination and repair	recombination and repair protein
2750250	2752000	25.2093	2751627	2751968	smpA	J	Translation, ribosomal structure and biogenesis	small membrane lipoprotein
3195375	3197125	25.0147	3194823	3197663	glnE	T	Signal transduction mechanism	fused deadenylyltransferase/adenylyltransferase for glutamine synthetase
4197000	4199250	24.9355	4196813	4197484	nfi	L	DNA replication, recombination and repair	endonuclease V
4197000	4199250	24.9355	4197527	4198117	yjaG	-	not classify	hypothetical protein
4197000	4199250	24.9355	4198304	4198576	hupA	-	not classify	HU, DNA-binding transcriptional regulator, alpha subunit
4197000	4199250	24.9355	4198589	4199284	yjaH	-	not classify	hypothetical protein
1508625	1509375	24.8636	1508027	1509433	ydcR	E	Amino acid transport and metabolism	fused predicted DNA-binding transcriptional regulator/predicted amino transferase
2074375	2074875	24.5577	2074332	2074778	yeeS	L	DNA replication, recombination and repair	CP4-44 prophage; predicted DNA repair protein
2074375	2074875	24.5577	2074841	2075062	yeeT	-	not classify	CP4-44 prophage; predicted protein
199000	199500	24.5533	197928	200360	yaeT	M	Cell envelope biogenesis, outer membrane	hypothetical protein
2163375	2164375	24.4107	2163213	2163545	yegP	-	not classify	hypothetical protein
2163375	2164375	24.4107	2163692	2165053	yegQ	-	not classify	predicted peptidase
3470125	3472375	24.2396	3469422	3471536	fusA	J	Translation, ribosomal structure and biogenesis	elongation factor EF-2
3470125	3472375	24.2396	3471564	3472103	rpsG	J	Translation, ribosomal structure and biogenesis	30S ribosomal protein S7
3470125	3472375	24.2396	3472200	3472574	rpsL	-	not classify	30S ribosomal protein S12
285125	285875	24.103	284619	286001	yagG	G	Carbohydrate transport and metabolism	CP4-6 prophage; predicted sugar transporter
4049125	4049625	24.0951	4049370	4049879	yihI	-	not classify	hypothetical protein
731250	733750	24.0475	728806	732999	rhsC	M	Cell envelope biogenesis, outer membrane	rhsC element core protein RshC
731250	733750	24.0475	732999	733325	ybfB	-	not classify	predicted inner membrane protein
731250	733750	24.0475	733443	734876	ybfO	M	Cell envelope biogenesis, outer membrane	conserved protein, rhs-like
1723750	1724500	23.9895	1723705	1723944	ydhL	R	General function prediction only	hypothetical protein
1723750	1724500	23.9895	1724131	1724646	ydhM	K	Transcription	predicted DNA-binding transcriptional regulator
143750	145000	23.9824	143702	144472	yadH	V	Defense mechanisms	predicted transporter subunit: membrane component of ABC superfamily
143750	145000	23.9824	144577	145017	yadI	G	Carbohydrate transport and metabolism	predicted PTS Enzyme IIA
1973750	1975750	23.9736	1973353	1974279	motB	N	Cell motility and secretion	flagellar motor protein MotB
1973750	1975750	23.9736	1974276	1975163	motA	N	Cell motility and secretion	flagellar motor protein MotA
1973750	1975750	23.9736	1975290	1975868	flhC	-	not classify	DNA-binding transcriptional dual regulator with FlhD
4314250	4315250	23.8775	4314105	4315241	phnM	P	Inorganic ion transport and metabolism	carbon-phosphorus lyase complex subunit
4314250	4315250	23.8775	4315238	4315918	phnL	P	Inorganic ion transport and metabolism	carbon-phosphorus lyase complex subunit
4423750	4425500	23.7964	4423543	4423857	priB	L	DNA replication, recombination and repair	primosomal replication protein N
4423750	4425500	23.7964	4423862	4424089	rpsR	-	not classify	30S ribosomal protein S18
4423750	4425500	23.7964	4424131	4424580	rplI	J	Translation, ribosomal structure and biogenesis	50S ribosomal protein L9
4423750	4425500	23.7964	4424651	4425445	yjfZ	-	not classify	hypothetical protein
2391750	2393500	23.6017	2391227	2393068	nuoL	P	Inorganic ion transport and metabolism	NADH dehydrogenase subunit L
2391750	2393500	23.6017	2393065	2393367	nuoK	C	Energy production and conversion	NADH dehydrogenase subunit K
2391750	2393500	23.6017	2393364	2393918	nuoJ	C	Energy production and conversion	NADH dehydrogenase subunit J
887125	887625	23.4945	886646	887182	ybjK	S	Function unknown	predicted DNA-binding transcriptional regulator
887125	887625	23.4945	887357	889042	ybjL	R	General function prediction only	hypothetical protein
2177250	2177750	23.4623	2176843	2178120	yegT	-	not classify	predicted nucleoside transporter
1722375	1724625	23.4127	1722158	1722679	sodC	-	not classify	superoxide dismutase, Cu, Zn
1722375	1724625	23.4127	1722760	1723656	ydhF	R	General function prediction only	predicted oxidoreductase
1722375	1724625	23.4127	1723705	1723944	ydhL	R	General function prediction only	hypothetical protein
1722375	1724625	23.4127	1724131	1724646	ydhM	K	Transcription	predicted DNA-binding transcriptional regulator
1162000	1163000	23.3357	1161861	1162502	ycfM	R	General function prediction only	predicted outer membrane lipoprotein
1162000	1163000	23.3357	1162483	1163307	ycfN	M	Cell envelope biogenesis, outer membrane	thiamin kinase
2364625	2370875	23.3137	2363932	2365089	yfbE	M	Cell envelope biogenesis, outer membrane	uridine 5'-(beta-1-threo-pentapyranosyl-4-ulose diphosphate) aminotransferase, PLP-dependent
2364625	2370875	23.3137	2365093	2366061	yfbF	M	Cell envelope biogenesis, outer membrane	undecaprenyl phosphate-L-Ara4FN transferase
2364625	2370875	23.3137	2366061	2368043	yfbG	G	Carbohydrate transport and metabolism	hypothetical protein
2364625	2370875	23.3137	2368040	2368930	yfbH	-	not classify	hypothetical protein
2364625	2370875	23.3137	2368930	2370582	arnT	M	Cell envelope biogenesis, outer membrane	4-amino-4-deoxy-L-arabinose transferase
2364625	2370875	23.3137	2370579	2370914	yfbW	-	not classify	hypothetical protein
4174375	4174875	23.1459	4173967	4175151	tufB	J	Translation, ribosomal structure and biogenesis	protein chain elongation factor EF-Tu (duplicate of tufA)
3401500	3402000	23.0593	3401506	3402480	yhdH	R	General function prediction only	predicted oxidoreductase, Zn-dependent and NAD(P)-binding
2151875	2153375	23.0271	2153287	2156409	mdtB	V	Defense mechanisms	multidrug efflux system, subunit B
645000	646500	22.9425	644340	645803	citT	P	Inorganic ion transport and metabolism	citrate:succinate antiporter
645000	646500	22.9425	645854	646732	citG	H	Coenzyme metabolism	triphosphoribosyl-dephospho-CoA transferase
1187750	1189500	22.9285	1187539	1188999	phoQ	T	Signal transduction mechanism	sensory histidine kinase in two-compoent regulatory system with PhoP
1187750	1189500	22.9285	1188999	1189670	phoP	K	Transcription	DNA-binding response regulator in two-component regulatory system with PhoQ
4028875	4034875	22.6621	4026805	4028994	fadB	I	Lipid metabolism	fused 3-hydroxybutyryl-CoA epimerase/delta(3)-cis-delta(2)-trans-enoyl-CoA isomerase/enoyl-CoA hydratase/3-hydroxyacyl-CoA dehydrogenase
4028875	4034875	22.6621	4029184	4030515	pepQ	E	Amino acid transport and metabolism	proline dipeptidase
4028875	4034875	22.6621	4030515	4031129	yigZ	S	Function unknown	predicted elongation factor
4028875	4034875	22.6621	4031168	4032619	trkH	P	Inorganic ion transport and metabolism	potassium transporter
4028875	4034875	22.6621	4032631	4033176	hemG	H	Coenzyme metabolism	protoporphyrin oxidase, flavoprotein
1327500	1328250	22.6518	1327356	1328405	sohB	U	Intracellular trafficking, secretion,and vesicular transport	predicted inner membrane peptidase
3417000	3417750	22.494	3417171	3418088	yhdW	T	Signal transduction mechanism	predicted amino-acid transporter subunit
1116250	1117000	22.4822	1116030	1117082	yceA	R	General function prediction only	hypothetical protein
3149875	3150875	22.4804	3149272	3150006	exbB	U	Intracellular trafficking, secretion,and vesicular transport	membrane spanning protein in TonB-ExbB-ExbD complex
3149875	3150875	22.4804	3150258	3151445	metC	E	Amino acid transport and metabolism	cystathionine beta-lyase
820625	821625	22.4026	820016	820729	ybhM	R	General function prediction only	conserved inner membrane protein
820625	821625	22.4026	820765	821721	ybhN	S	Function unknown	conserved inner membrane protein
346375	347125	22.2676	346081	347667	prpR	T	Signal transduction mechanism	DNA-binding transcriptional activator
2310250	2311250	22.1938	2309668	2310771	ompC	M	Cell envelope biogenesis, outer membrane	outer membrane porin protein C
4304875	4305875	22.165	4305806	4306501	alsE	G	Carbohydrate transport and metabolism	allulose-6-phosphate 3-epimerase
3377000	3378000	22.1086	3376892	3378019	yhcM	R	General function prediction only	conserved protein with nucleoside triphosphate hydrolase domain
1656125	1659625	22.0803	1656093	1658519	ynfE	C	Energy production and conversion	oxidoreductase subunit
1656125	1659625	22.0803	1658580	1661003	ynfF	C	Energy production and conversion	oxidoreductase subunit
4374000	4375000	22.0565	4373722	4374288	efp	J	Translation, ribosomal structure and biogenesis	elongation factor P
4374000	4375000	22.0565	4374340	4374465	ecnA	-	not classify	entericidin A membrane lipoprotein, antidote entericidin B
4374000	4375000	22.0565	4374576	4374722	ecnB	S	Function unknown	entericidin B membrane lipoprotein
4374000	4375000	22.0565	4374898	4375215	sugE	P	Inorganic ion transport and metabolism	multidrug efflux system protein
3954875	3955875	22.0514	3953354	3954898	ilvA	E	Amino acid transport and metabolism	threonine dehydratase
3954875	3955875	22.0514	3954950	3955843	ilvY	K	Transcription	DNA-binding transcriptional dual regulator
3459000	3461750	22.0418	3457839	3459035	gspF	U	Intracellular trafficking, secretion,and vesicular transport	general secretory pathway component, cryptic
3459000	3461750	22.0418	3459045	3459482	gspG	U	Intracellular trafficking, secretion,and vesicular transport	pseudopilin, cryptic, general secretion pathway
3459000	3461750	22.0418	3459490	3459999	gspH	-	not classify	predicted general secretory pathway component, cryptic
3459000	3461750	22.0418	3459996	3460373	gspI	U	Intracellular trafficking, secretion,and vesicular transport	general secretory pathway component, cryptic
3459000	3461750	22.0418	3460366	3460953	gspJ	U	Intracellular trafficking, secretion,and vesicular transport	predicted general secretory pathway component, cryptic
3459000	3461750	22.0418	3460946	3461929	gspK	U	Intracellular trafficking, secretion,and vesicular transport	general secretory pathway component, cryptic
1481375	1482875	22.0387	1481142	1484987	hrpA	L	DNA replication, recombination and repair	ATP-dependent helicase
3694250	3695500	21.9856	3694481	3696052	bcsE	-	not classify	hypothetical protein
471125	471625	21.9851	469860	471641	mdlB	V	Defense mechanisms	fused predicted multidrug transporter subunits of ABC superfamily: ATP-binding components
2339875	2343125	21.9606	2338439	2342191	yfaL	U	Intracellular trafficking, secretion,and vesicular transport	adhesin
2339875	2343125	21.9606	2342887	2345172	nrdA	F	Nucleotide transport and metabolism	ribonucleotide-diphosphate reductase alpha subunit
3501375	3502625	21.9245	3501189	3501974	frlD	G	Carbohydrate transport and metabolism	fructoselysine 6-kinase
3501375	3502625	21.9245	3502074	3502805	frlR	K	Transcription	predicted DNA-binding transcriptional regulator
820375	821875	21.8685	820016	820729	ybhM	R	General function prediction only	conserved inner membrane protein
820375	821875	21.8685	820765	821721	ybhN	S	Function unknown	conserved inner membrane protein
820375	821875	21.8685	821721	822962	ybhO	I	Lipid metabolism	cardiolipin synthase 2
1552625	1554125	21.8249	1551996	1553693	sfcA	C	Energy production and conversion	malate dehydrogenase, (decarboxylating, NAD-requiring) (malic enzyme)
1552625	1554125	21.8249	1553850	1553987	sra	-	not classify	30S ribosomal subunit protein S22
1552625	1554125	21.8249	1554089	1554304	bdm	-	not classify	biofilm-dependent modulation protein
204750	206500	21.7544	204493	205089	rnhB	L	DNA replication, recombination and repair	ribonuclease HII
204750	206500	21.7544	205126	208608	dnaE	L	DNA replication, recombination and repair	DNA polymerase III subunit alpha
992000	993000	21.6581	989845	992457	pepN	E	Amino acid transport and metabolism	aminopeptidase N
992000	993000	21.6581	992500	993267	ssuB	P	Inorganic ion transport and metabolism	alkanesulfonate transporter subunit
925000	925500	21.4774	925448	925666	infA	J	Translation, ribosomal structure and biogenesis	translation initiation factor IF-1
585875	586375	21.3094	585370	586131	envY	-	not classify	DNA-binding transcriptional activator of porin biosynthesis
585875	586375	21.3094	586314	587204	ybcH	-	not classify	hypothetical protein
4598625	4599125	21.2031	4598261	4598998	dnaC	L	DNA replication, recombination and repair	DNA biosynthesis protein
4598625	4599125	21.2031	4599001	4599540	dnaT	-	not classify	primosomal protein I
712125	715125	21.1169	714635	715129	ybfP	-	not classify	hypothetical protein
644875	646625	21.0883	644340	645803	citT	P	Inorganic ion transport and metabolism	citrate:succinate antiporter
644875	646625	21.0883	645854	646732	citG	H	Coenzyme metabolism	triphosphoribosyl-dephospho-CoA transferase
949750	950500	21.0716	949563	950303	pflA	O	Posttranslational modification, protein turnover, chaperones	pyruvate formate lyase activating enzyme 1
949750	950500	21.0716	950495	952777	pflB	C	Energy production and conversion	pyruvate formate lyase I
2252750	2253750	21.0324	2252267	2253208	rihB	F	Nucleotide transport and metabolism	ribonucleoside hydrolase 2
2252750	2253750	21.0324	2253377	2254036	yeiL	T	Signal transduction mechanism	DNA-binding transcriptional activator of stationary phase nitrogen survival
1338750	1339750	21.0222	1338582	1339751	yciM	G	Carbohydrate transport and metabolism	hypothetical protein
542875	543875	20.9593	542485	543270	ylbA	R	General function prediction only	hypothetical protein
542875	543875	20.9593	543281	544516	allC	E	Amino acid transport and metabolism	N-carbamoyl-L-amino acid amidohydrolase
118375	119375	20.8919	117752	118645	nadC	H	Coenzyme metabolism	nicotinate-nucleotide pyrophosphorylase
118375	119375	20.8919	118733	119284	ampD	V	Defense mechanisms	N-acetyl-anhydromuranmyl-L-alanine amidase
118375	119375	20.8919	119281	120135	ampE	V	Defense mechanisms	predicted inner membrane protein
285000	286000	20.8638	284619	286001	yagG	G	Carbohydrate transport and metabolism	CP4-6 prophage; predicted sugar transporter
1362250	1365250	20.8347	1360767	1362254	puuC	C	Energy production and conversion	gamma-Glu-gamma-aminobutyraldehyde dehydrogenase, NAD(P)H-dependent
1362250	1365250	20.8347	1362256	1363536	puuB	E	Amino acid transport and metabolism	gamma-Glu-putrescine oxidase, FAD/NAD(P)-binding
1362250	1365250	20.8347	1363574	1364839	puuE	E	Amino acid transport and metabolism	GABA aminotransferase, PLP-dependent
1362250	1365250	20.8347	1364959	1365936	pspF	T	Signal transduction mechanism	DNA-binding transcriptional activator
1841625	1842375	20.8095	1840395	1841738	gdhA	E	Amino acid transport and metabolism	glutamate dehydrogenase
1841625	1842375	20.8095	1841855	1842895	ynjI	-	not classify	predicted inner membrane protein
3175875	3176375	20.7263	3175303	3175932	nudF	R	General function prediction only	ADP-ribose pyrophosphatase
3175875	3176375	20.7263	3176137	3177618	tolC	U	Intracellular trafficking, secretion,and vesicular transport	outer membrane channel precursor protein
260000	262000	20.7058	259612	260715	proB	E	Amino acid transport and metabolism	gamma-glutamyl kinase
260000	262000	20.7058	260727	261980	proA	E	Amino acid transport and metabolism	gamma-glutamyl phosphate reductase
4600875	4601375	20.7054	4600111	4600881	yjjP	S	Function unknown	predicted inner membrane protein
1530000	1531750	20.7024	1529840	1530976	ydcC	L	DNA replication, recombination and repair	hypothetical protein
1530000	1531750	20.7024	1531076	1531309	ydcE	R	General function prediction only	4-oxalocrotonate tautomerase
1530000	1531750	20.7024	1531306	1531875	yddH	R	General function prediction only	hypothetical protein
1049125	1050125	20.6944	1049056	1049331	insA-4	L	DNA replication, recombination and repair	IS1 repressor protein InsA
1049125	1050125	20.6944	1049250	1049753	insB-4	L	DNA replication, recombination and repair	IS1 transposase InsAB'
84625	85125	20.6697	84368	85312	leuO	K	Transcription	leucine transcriptional activator
208250	209250	20.611	205126	208608	dnaE	L	DNA replication, recombination and repair	DNA polymerase III subunit alpha
208250	209250	20.611	208621	209580	accA	I	Lipid metabolism	acetyl-CoA carboxylase subunit alpha
493625	494375	20.5653	493300	493629	ybaB	S	Function unknown	hypothetical protein
493625	494375	20.5653	493629	494234	recR	L	DNA replication, recombination and repair	recombination protein RecR
493625	494375	20.5653	494344	496218	htpG	O	Posttranslational modification, protein turnover, chaperones	heat shock protein 90
1388500	1391000	20.5204	1387894	1388682	mpaA	E	Amino acid transport and metabolism	murein peptide amidase A
1388500	1391000	20.5204	1388957	1389889	ycjY	R	General function prediction only	predicted hydrolase
1388500	1391000	20.5204	1390015	1390914	ycjZ	K	Transcription	predicted DNA-binding transcriptional regulator
1617875	1619375	20.4919	1617598	1617981	marA	-	not classify	DNA-binding transcriptional dual activator of multiple antibiotic resistance
1617875	1619375	20.4919	1618013	1618231	marB	-	not classify	hypothetical protein
1617875	1619375	20.4919	1618262	1619161	eamA	-	not classify	cysteine and O-acetyl-L-serine efflux system
1617875	1619375	20.4919	1619356	1620543	ydeE	-	not classify	predicted transporter
417750	418250	20.4705	417113	418408	phoR	T	Signal transduction mechanism	sensory histidine kinase in two-component regulatory system with PhoB
389625	391125	20.3771	390963	391829	insF-2	L	DNA replication, recombination and repair	IS3 element protein InsF
767250	769250	20.1997	767201	769834	mngB	G	Carbohydrate transport and metabolism	alpha-mannosidase
2929750	2930750	20.1662	2928987	2929832	xni	L	DNA replication, recombination and repair	exonuclease IX
2929750	2930750	20.1662	2929887	2931038	fucO	C	Energy production and conversion	L-1,2-propanediol oxidoreductase
2525500	2526500	20.033	2524968	2525966	yfeH	R	General function prediction only	predicted inner membrane protein
2525500	2526500	20.033	2525963	2526181	ypeB	S	Function unknown	hypothetical protein
2525500	2526500	20.033	2526183	2528198	ligA	L	DNA replication, recombination and repair	NAD-dependent DNA ligase LigA
4047125	4047875	20.0307	4044989	4047775	polA	L	DNA replication, recombination and repair	DNA polymerase I
2990375	2991375	19.989	2990116	2991492	ygeH	K	Transcription	predictedtranscriptional regulator
2626250	2627250	19.9813	2624717	2626960	yfgF	T	Signal transduction mechanism	predicted inner membrane protein
1567625	1568625	19.951	1566978	1568513	gadC	E	Amino acid transport and metabolism	predicted glutamate:gamma-aminobutyric acid antiporter
4304500	4306500	19.8859	4302635	4304620	yjcS	Q	Secondary metabolites biosynthesis, transport and catabolism	predicted alkyl sulfatase
4304500	4306500	19.8859	4304893	4305822	alsK	G	Carbohydrate transport and metabolism	D-allose kinase
4304500	4306500	19.8859	4305806	4306501	alsE	G	Carbohydrate transport and metabolism	allulose-6-phosphate 3-epimerase
3307375	3308875	19.7085	3307055	3309259	pnp	J	Translation, ribosomal structure and biogenesis	polynucleotide phosphorylase/polyadenylase
3724375	3725375	19.5995	3723910	3724905	yiaH	S	Function unknown	conserved inner membrane protein
3724375	3725375	19.5995	3724947	3725384	yiaA	S	Function unknown	conserved inner membrane protein
4197125	4198625	19.5942	4196813	4197484	nfi	L	DNA replication, recombination and repair	endonuclease V
4197125	4198625	19.5942	4197527	4198117	yjaG	-	not classify	hypothetical protein
4197125	4198625	19.5942	4198304	4198576	hupA	-	not classify	HU, DNA-binding transcriptional regulator, alpha subunit
4197125	4198625	19.5942	4198589	4199284	yjaH	-	not classify	hypothetical protein
286125	288125	19.5199	286013	287623	yagH	G	Carbohydrate transport and metabolism	CP4-6 prophage; predicted xylosidase/arabinosidase
286125	288125	19.5199	287628	288386	yagI	K	Transcription	CP4-6 prophage; predicted DNA-binding transcriptional regulator
3740000	3740500	19.2527	3739707	3740555	yiaJ	K	Transcription	predicted DNA-binding transcriptional repressor
3979875	3980375	19.2445	3978910	3980295	yifK	E	Amino acid transport and metabolism	predicted transporter
1648125	1648875	19.1925	1648102	1649022	ydfE	-	not classify	Qin prophage; predicted protein
3763375	3765625	19.1889	3760206	3764339	rhsA	M	Cell envelope biogenesis, outer membrane	rhsA element core protein RshA
3763375	3765625	19.1889	3764360	3765202	yibA	C	Energy production and conversion	lyase containing HEAT-repeat
3763375	3765625	19.1889	3765244	3765945	yibJ	M	Cell envelope biogenesis, outer membrane	predicted Rhs-family protein
2240375	2242375	19.0937	2239832	2240989	yeiB	S	Function unknown	conserved inner membrane protein
2240375	2242375	19.0937	2241006	2241674	folE	H	Coenzyme metabolism	GTP cyclohydrolase I
2240375	2242375	19.0937	2241932	2242768	yeiG	R	General function prediction only	predicted esterase
4256625	4257125	19.09	4255765	4257144	dinF	V	Defense mechanisms	DNA-damage-inducible SOS response protein
3703625	3704125	19.074	3702794	3703813	dppB	P	Inorganic ion transport and metabolism	dipeptide transporter
3703625	3704125	19.074	3704121	3705728	dppA	E	Amino acid transport and metabolism	dipeptide transporter
1702250	1703250	19.0469	1701292	1702332	ydgJ	R	General function prediction only	predicted oxidoreductase
1702250	1703250	19.0469	1702575	1702700	blr	-	not classify	beta-lactam resistance membrane protein
1702250	1703250	19.0469	1702973	1703188	ydgT	-	not classify	predicted regulator
2380000	2381000	19.0287	2379630	2380547	elaC	R	General function prediction only	ribonuclease Z
2380000	2381000	19.0287	2380735	2381946	elaD	-	not classify	predicted enzyme
3437500	3439500	19.0062	3437163	3437531	yhdN	-	not classify	hypothetical protein
3437500	3439500	19.0062	3437638	3438021	rplQ	J	Translation, ribosomal structure and biogenesis	50S ribosomal protein L17
3437500	3439500	19.0062	3438062	3439051	rpoA	K	Transcription	DNA-directed RNA polymerase subunit alpha
3437500	3439500	19.0062	3439077	3439697	rpsD	J	Translation, ribosomal structure and biogenesis	30S ribosomal protein S4
287625	288125	18.9305	287628	288386	yagI	K	Transcription	CP4-6 prophage; predicted DNA-binding transcriptional regulator
3830375	3832625	18.823	3830242	3832560	yicI	G	Carbohydrate transport and metabolism	predicted alpha-glucosidase
3830375	3832625	18.823	3832570	3833952	yicJ	G	Carbohydrate transport and metabolism	predicted transporter
1970250	1971250	18.8161	1969054	1970715	tar	T	Signal transduction mechanism	methyl-accepting chemotaxis protein II
1970250	1971250	18.8161	1970860	1971363	cheW	T	Signal transduction mechanism	purine-binding chemotaxis protein
2816000	2817000	18.8032	2816983	2817168	csrA	-	not classify	carbon storage regulator
1556875	1558375	18.8009	1556055	1557041	ddpD	P	Inorganic ion transport and metabolism	D-ala-D-ala transporter subunit
1556875	1558375	18.8009	1557038	1557934	ddpC	P	Inorganic ion transport and metabolism	D-ala-D-ala transporter subunit
1556875	1558375	18.8009	1557931	1558953	ddpB	P	Inorganic ion transport and metabolism	D-ala-D-ala transporter subunit
2858500	2859750	18.6545	2858489	2859286	ygbI	G	Carbohydrate transport and metabolism	predicted DNA-binding transcriptional regulator
2858500	2859750	18.6545	2859452	2860360	ygbJ	I	Lipid metabolism	predicted dehydrogenase, with NAD(P)-binding Rossmann-fold domain
292250	293000	18.603	292444	293142	yagL	L	DNA replication, recombination and repair	CP4-6 prophage; DNA-binding protein
1313875	1314625	18.5978	1314440	1315246	trpA	E	Amino acid transport and metabolism	tryptophan synthase subunit alpha
478875	480625	18.5763	478591	479142	maa	R	General function prediction only	maltose O-acetyltransferase
478875	480625	18.5763	479314	479532	hha	-	not classify	modulator of gene expression, with H-NS
478875	480625	18.5763	479558	479932	ybaJ	-	not classify	hypothetical protein
478875	480625	18.5763	480478	483627	acrB	V	Defense mechanisms	multidrug efflux system protein
2433625	2434125	18.5606	2432846	2433658	truA	J	Translation, ribosomal structure and biogenesis	tRNA pseudouridine synthase A
2433625	2434125	18.5606	2433658	2434671	usg	E	Amino acid transport and metabolism	hypothetical protein
514000	514500	18.4966	513625	514080	ybbJ	U	Intracellular trafficking, secretion,and vesicular transport	conserved inner membrane protein
514000	514500	18.4966	514080	514997	ybbK	O	Posttranslational modification, protein turnover, chaperones	predicted protease, membrane anchored
687625	688625	18.4536	687220	688236	insH-3	L	DNA replication, recombination and repair	IS5 transposase and trans-activator
687625	688625	18.4536	688566	690104	lnt	M	Cell envelope biogenesis, outer membrane	apolipoprotein N-acyltransferase
1284625	1285875	18.4127	1284362	1285072	narJ	C	Energy production and conversion	molybdenum-cofactor-assembly chaperone subunit (delta subunit) of nitrate reductase 1
1284625	1285875	18.4127	1285072	1285749	narI	C	Energy production and conversion	nitrate reductase 1, gamma (cytochrome b(NR)) subunit
4489375	4491125	18.4073	4489229	4490548	idnT	E	Amino acid transport and metabolism	L-idonate and D-gluconate transporter
4489375	4491125	18.4073	4490610	4491374	idnO	R	General function prediction only	gluconate 5-dehydrogenase
3096625	3097375	18.3774	3096580	3097587	yggM	-	not classify	hypothetical protein
4248750	4249750	18.3724	4248978	4250306	yjbI	S	Function unknown	hypothetical protein
896500	897000	18.3297	896307	897152	potI	E	Amino acid transport and metabolism	putrescine transporter subunit: membrane component of ABC superfamily
1170250	1172000	18.256	1169741	1173187	mfd	K	Transcription	transcription-repair coupling factor
728750	729250	18.2495	728806	732999	rhsC	M	Cell envelope biogenesis, outer membrane	rhsC element core protein RshC
354125	355625	18.1706	355395	356678	codA	R	General function prediction only	cytosine deaminase
936750	937250	18.1604	936592	937206	lolA	M	Cell envelope biogenesis, outer membrane	outer-membrane lipoprotein carrier protein precursor
936750	937250	18.1604	937217	938560	ycaJ	L	DNA replication, recombination and repair	recombination protein
382625	383375	18.112	381963	383159	yaiP	M	Cell envelope biogenesis, outer membrane	predicted glucosyltransferase
382625	383375	18.112	383283	383840	yaiS	S	Function unknown	hypothetical protein
4089000	4090500	18.0746	4088938	4090389	frvB	G	Carbohydrate transport and metabolism	fused predicted PTS enzymes: IIB component/IIC component
4089000	4090500	18.0746	4090400	4090846	frvA	T	Signal transduction mechanism	predicted enzyme IIA component of PTS
565750	566500	18.0542	565674	565910	ybcD	-	not classify	DLP12 prophage; predicted replication protein fragment (pseudogene)
565750	566500	18.0542	566056	566364	insE-3	-	not classify	DLP12 prophage; IS3 element protein InsE
565750	566500	18.0542	566361	567227	insF-3	L	DNA replication, recombination and repair	DLP12 prophage; IS3 element protein InsF
3527500	3528250	18.0321	3527370	3527771	hslR	J	Translation, ribosomal structure and biogenesis	ribosome-associated heat shock protein Hsp15
3527500	3528250	18.0321	3527796	3528674	hslO	-	not classify	Hsp33-like chaperonin
284500	286000	18.0294	284619	286001	yagG	G	Carbohydrate transport and metabolism	CP4-6 prophage; predicted sugar transporter
4551875	4553625	17.8918	4550924	4552384	uxuB	-	not classify	D-mannonate oxidoreductase, NAD-binding
4551875	4553625	17.8918	4552599	4553372	uxuR	K	Transcription	DNA-binding transcriptional repressor
4551875	4553625	17.8918	4553513	4554343	yjiC	-	not classify	hypothetical protein
4304500	4306750	17.8569	4302635	4304620	yjcS	Q	Secondary metabolites biosynthesis, transport and catabolism	predicted alkyl sulfatase
4304500	4306750	17.8569	4304893	4305822	alsK	G	Carbohydrate transport and metabolism	D-allose kinase
4304500	4306750	17.8569	4305806	4306501	alsE	G	Carbohydrate transport and metabolism	allulose-6-phosphate 3-epimerase
4304500	4306750	17.8569	4306512	4307492	alsC	G	Carbohydrate transport and metabolism	D-allose transporter subunit
4403625	4405875	17.8511	4402710	4404008	purA	-	not classify	adenylosuccinate synthetase
4403625	4405875	17.8511	4404213	4404638	yjeB	K	Transcription	predicted DNA-binding transcriptional regulator
4403625	4405875	17.8511	4404677	4407118	rnr	K	Transcription	exoribonuclease R, RNase R
271750	272250	17.8199	272071	273216	ykfC	L	DNA replication, recombination and repair	CP4-6 prophage; conserved protein
354250	355500	17.819	354146	355405	codB	F	Nucleotide transport and metabolism	cytosine transporter
354250	355500	17.819	355395	356678	codA	R	General function prediction only	cytosine deaminase
292375	292875	17.8134	292444	293142	yagL	L	DNA replication, recombination and repair	CP4-6 prophage; DNA-binding protein
2750250	2751750	17.7793	2749817	2751478	recN	L	DNA replication, recombination and repair	recombination and repair protein
2750250	2751750	17.7793	2751627	2751968	smpA	J	Translation, ribosomal structure and biogenesis	small membrane lipoprotein
1654125	1655375	17.7033	1653832	1654173	ynfB	-	not classify	hypothetical protein
1654125	1655375	17.7033	1654208	1654768	speG	J	Translation, ribosomal structure and biogenesis	spermidine N1-acetyltransferase
1654125	1655375	17.7033	1654771	1655481	ynfC	-	not classify	hypothetical protein
3992750	3993250	17.667	3992785	3993609	dapF	E	Amino acid transport and metabolism	diaminopimelate epimerase
175250	176500	17.6428	175107	176528	yadQ	P	Inorganic ion transport and metabolism	chloride channel protein
2338375	2339375	17.5887	2338439	2342191	yfaL	U	Intracellular trafficking, secretion,and vesicular transport	adhesin
2464875	2465625	17.5684	2464567	2465724	intS	L	DNA replication, recombination and repair	CPS-53 (KpLE1) prophage; predicted prophage CPS-53 integrase
1338625	1339875	17.5604	1338582	1339751	yciM	G	Carbohydrate transport and metabolism	hypothetical protein
342250	343000	17.5464	342108	343157	yahK	R	General function prediction only	predicted oxidoreductase, Zn-dependent and NAD(P)-binding
2121750	2125000	17.5402	2121108	2122544	cpsB	G	Carbohydrate transport and metabolism	mannose-1-phosphate guanyltransferase
2121750	2125000	17.5402	2122547	2123770	wcaI	M	Cell envelope biogenesis, outer membrane	predicted glycosyl transferase
2121750	2125000	17.5402	2123767	2124246	nudD	R	General function prediction only	GDP-mannose mannosyl hydrolase
2121750	2125000	17.5402	2124249	2125214	fcl	G	Carbohydrate transport and metabolism	bifunctional GDP-fucose synthetase: GDP-4-dehydro-6-deoxy-D-mannose epimerase/ GDP-4-dehydro-6-L-deoxygalactose reductase
3460750	3461250	17.4573	3460366	3460953	gspJ	U	Intracellular trafficking, secretion,and vesicular transport	predicted general secretory pathway component, cryptic
3460750	3461250	17.4573	3460946	3461929	gspK	U	Intracellular trafficking, secretion,and vesicular transport	general secretory pathway component, cryptic
2585500	2586000	17.4068	2585617	2588730	acrD	V	Defense mechanisms	aminoglycoside/multidrug efflux system
3079875	3081125	17.4029	3080899	3081819	speB	E	Amino acid transport and metabolism	agmatinase
2757750	2759000	17.3147	2757007	2758416	yfjI	-	not classify	CP4-57 prophage; predicted protein
2757750	2759000	17.3147	2758569	2759195	yfjJ	-	not classify	CP4-57 prophage; predicted protein
702875	704875	17.2928	703167	705113	nagE	G	Carbohydrate transport and metabolism	fused N-acetyl glucosamine specific PTS enzyme: IIC, IIB , and IIA components
2236375	2237375	17.2682	2235791	2237311	mglA	G	Carbohydrate transport and metabolism	fused methyl-galactoside transporter subunits of ABC superfamily: ATP-binding components
2236375	2237375	17.2682	2237372	2238370	mglB	G	Carbohydrate transport and metabolism	methyl-galactoside transporter subunit
3572500	3573000	17.266	3571798	3572901	asd	E	Amino acid transport and metabolism	aspartate-semialdehyde dehydrogenase
471000	471750	17.2456	469860	471641	mdlB	V	Defense mechanisms	fused predicted multidrug transporter subunits of ABC superfamily: ATP-binding components
156500	157500	17.2428	156299	156883	yadN	U	Intracellular trafficking, secretion,and vesicular transport	predicted fimbrial-like adhesin protein
156500	157500	17.2428	157253	157732	folK	H	Coenzyme metabolism	2-amino-4-hydroxy-6-hydroxymethyldihyropteridine pyrophosphokinase
1107625	1108375	17.1222	1107007	1108164	mdoC	-	not classify	glucans biosynthesis protein
1274625	1275625	17.1213	1274402	1275052	narL	K	Transcription	DNA-binding response regulator in two-component regulatory system with NarX (or NarQ)
1274625	1275625	17.1213	1275045	1276841	narX	T	Signal transduction mechanism	sensory histidine kinase in two-component regulatory system with NarL
3978500	3980500	17.0753	3977979	3978719	wecG	M	Cell envelope biogenesis, outer membrane	putative UDP-N-acetyl-D-mannosaminuronic acid transferase
3978500	3980500	17.0753	3978910	3980295	yifK	E	Amino acid transport and metabolism	predicted transporter
1643375	1643875	17.07	1643370	1643657	relE	D	Cell division and chromosome partitioning	Qin prophage; toxin of the RelE-RelB toxin-antitoxin system
1643375	1643875	17.07	1643657	1643896	relB	L	DNA replication, recombination and repair	Qin prophage; bifunctional antitoxin of the RelE-RelB toxin-antitoxin system/ transcriptional repressor
1570375	1572875	17.0659	1570431	1573226	pqqL	R	General function prediction only	predicted peptidase
1244875	1245375	17.0477	1244902	1246599	treA	G	Carbohydrate transport and metabolism	periplasmic trehalase
4257375	4258375	17.0315	4257260	4257469	yjbJ	S	Function unknown	predicted stress response protein
4257375	4258375	17.0315	4257511	4258026	zur	P	Inorganic ion transport and metabolism	DNA-binding transcriptional repressor, Zn(II)-binding
4257375	4258375	17.0315	4258344	4258598	yjbL	-	not classify	hypothetical protein
427000	428750	17.0108	426871	428718	secD	U	Intracellular trafficking, secretion,and vesicular transport	protein export protein SecD
427000	428750	17.0108	428729	429700	secF	U	Intracellular trafficking, secretion,and vesicular transport	protein export protein SecF
2611250	2612000	16.9997	2609922	2611934	hyfR	T	Signal transduction mechanism	DNA-binding transcriptional activator, formate sensing
2611250	2612000	16.9997	2611956	2612804	focB	P	Inorganic ion transport and metabolism	predicted formate transporter
1974625	1975625	16.9837	1974276	1975163	motA	N	Cell motility and secretion	flagellar motor protein MotA
1974625	1975625	16.9837	1975290	1975868	flhC	-	not classify	DNA-binding transcriptional dual regulator with FlhD
2943625	2944625	16.9059	2943058	2943864	ygdL	H	Coenzyme metabolism	hypothetical protein
2943625	2944625	16.9059	2944103	2945200	mltA	M	Cell envelope biogenesis, outer membrane	membrane-bound lytic murein transglycosylase A
1444000	1445000	16.9004	1443904	1444230	ydbL	-	not classify	hypothetical protein
1444000	1445000	16.9004	1444402	1445307	feaR	-	not classify	DNA-binding transcriptional dual regulator
128000	129250	16.8995	127912	129336	lpdA	C	Energy production and conversion	dihydrolipoamide dehydrogenase
1379000	1380250	16.8804	1379971	1380876	ompG	-	not classify	outer membrane porin
3294000	3294500	16.867	3293831	3294421	yraO	G	Carbohydrate transport and metabolism	DnaA initiator-associating factor for replication initiation
3294000	3294500	16.867	3294431	3295006	yraP	R	General function prediction only	hypothetical protein
2419125	2420125	16.8625	2418643	2419290	yfcG	O	Posttranslational modification, protein turnover, chaperones	predicted glutathione S-transferase
2419125	2420125	16.8625	2419347	2419709	folX	H	Coenzyme metabolism	D-erythro-7,8-dihydroneopterin triphosphate 2'-epimerase and dihydroneopterin aldolase
2419125	2420125	16.8625	2419730	2420623	yfcH	R	General function prediction only	conserved protein with NAD(P)-binding Rossmann-fold domain
3983000	3984250	16.7874	3982375	3984030	aslA	P	Inorganic ion transport and metabolism	acrylsulfatase-like enzyme
852500	853000	16.6008	852406	852873	mntR	K	Transcription	DNA-binding transcriptional regulator of mntH
852500	853000	16.6008	852870	853988	ybiR	P	Inorganic ion transport and metabolism	predicted transporter
4045000	4062500	16.5893	4044989	4047775	polA	L	DNA replication, recombination and repair	DNA polymerase I
4045000	4062500	16.5893	4048156	4048752	yihA	R	General function prediction only	GTP-binding protein
4045000	4062500	16.5893	4049370	4049879	yihI	-	not classify	hypothetical protein
4045000	4062500	16.5893	4050068	4051441	hemN	H	Coenzyme metabolism	coproporphyrinogen III oxidase
4045000	4062500	16.5893	4051892	4053301	glnG	T	Signal transduction mechanism	fused DNA-binding response regulator in two-component regulatory system with GlnL: response regulator/sigma54 interaction protein
4045000	4062500	16.5893	4053313	4054362	glnL	T	Signal transduction mechanism	sensory histidine kinase in two-component regulatory system with GlnG
4045000	4062500	16.5893	4054648	4056057	glnA	-	not classify	glutamine synthetase
4045000	4062500	16.5893	4056430	4058253	bipA	T	Signal transduction mechanism	GTP-binding protein
4045000	4062500	16.5893	4058470	4059180	yihL	K	Transcription	predicted DNA-binding transcriptional regulator
4045000	4062500	16.5893	4059188	4060168	yihM	G	Carbohydrate transport and metabolism	predicted sugar phosphate isomerase
4045000	4062500	16.5893	4060270	4061535	yihN	-	not classify	predicted transporter
4045000	4062500	16.5893	4061626	4062318	ompL	-	not classify	predicted outer membrane porin L
4045000	4062500	16.5893	4062386	4063789	yihO	G	Carbohydrate transport and metabolism	predited transporter
1710250	1712750	16.5743	1712401	1713006	gst	O	Posttranslational modification, protein turnover, chaperones	glutathionine S-transferase
2994750	3001750	16.541	2994394	2995299	insD-4	L	DNA replication, recombination and repair	IS2 insertion element transposase InsAB'
2994750	3001750	16.541	2995257	2995667	insC-4	L	DNA replication, recombination and repair	IS2 insertion element repressor InsA
2994750	3001750	16.541	2995711	2996010	ygeP	-	not classify	hypothetical protein
2994750	3001750	16.541	2996056	2996850	ygeQ	-	not classify	hypothetical protein
2994750	3001750	16.541	2997158	2997913	ygeR	M	Cell envelope biogenesis, outer membrane	Tetratricopeptide repeat transcriptional regulator
2994750	3001750	16.541	2998367	3000625	xdhA	C	Energy production and conversion	xanthine dehydrogenase, molybdenum binding subunit
2994750	3001750	16.541	3000636	3001514	xdhB	-	not classify	xanthine dehydrogenase, FAD-binding subunit
2994750	3001750	16.541	3001511	3001990	xdhC	C	Energy production and conversion	xanthine dehydrogenase, Fe-S binding subunit
445875	451875	16.4163	444526	445890	yajR	-	not classify	predicted transporter
445875	451875	16.4163	446039	446929	cyoE	O	Posttranslational modification, protein turnover, chaperones	protoheme IX farnesyltransferase
445875	451875	16.4163	446941	447270	cyoD	C	Energy production and conversion	cytochrome o ubiquinol oxidase subunit IV
445875	451875	16.4163	447270	447884	cyoC	C	Energy production and conversion	cytochrome o ubiquinol oxidase subunit III
445875	451875	16.4163	447874	449865	cyoB	C	Energy production and conversion	cytochrome o ubiquinol oxidase subunit I
445875	451875	16.4163	449887	450834	cyoA	C	Energy production and conversion	cytochrome o ubiquinol oxidase subunit II
445875	451875	16.4163	451294	452769	ampG	-	not classify	muropeptide transporter
4489250	4491250	16.3906	4489229	4490548	idnT	E	Amino acid transport and metabolism	L-idonate and D-gluconate transporter
4489250	4491250	16.3906	4490610	4491374	idnO	R	General function prediction only	gluconate 5-dehydrogenase
2078750	2079250	16.3776	2078813	2079286	sbmC	L	DNA replication, recombination and repair	DNA gyrase inhibitor
1886500	1887750	16.369	1886085	1887770	fadD	Q	Secondary metabolites biosynthesis, transport and catabolism	acyl-CoA synthase
1685250	1687000	16.3466	1684755	1686401	fumA	C	Energy production and conversion	fumarate hydratase (fumarase A), aerobic Class I
1685250	1687000	16.3466	1686600	1687775	manA	G	Carbohydrate transport and metabolism	mannose-6-phosphate isomerase
1901000	1901500	16.3402	1900072	1901043	manX	G	Carbohydrate transport and metabolism	fused mannose-specific PTS enzymes: IIA component/IIB component
1901000	1901500	16.3402	1901106	1901906	manY	-	not classify	mannose-specific enzyme IIC component of PTS
565750	566250	16.3312	565674	565910	ybcD	-	not classify	DLP12 prophage; predicted replication protein fragment (pseudogene)
565750	566250	16.3312	566056	566364	insE-3	-	not classify	DLP12 prophage; IS3 element protein InsE
731125	733875	16.3187	728806	732999	rhsC	M	Cell envelope biogenesis, outer membrane	rhsC element core protein RshC
731125	733875	16.3187	732999	733325	ybfB	-	not classify	predicted inner membrane protein
731125	733875	16.3187	733443	734876	ybfO	M	Cell envelope biogenesis, outer membrane	conserved protein, rhs-like
3459875	3461625	16.3	3459490	3459999	gspH	-	not classify	predicted general secretory pathway component, cryptic
3459875	3461625	16.3	3459996	3460373	gspI	U	Intracellular trafficking, secretion,and vesicular transport	general secretory pathway component, cryptic
3459875	3461625	16.3	3460366	3460953	gspJ	U	Intracellular trafficking, secretion,and vesicular transport	predicted general secretory pathway component, cryptic
3459875	3461625	16.3	3460946	3461929	gspK	U	Intracellular trafficking, secretion,and vesicular transport	general secretory pathway component, cryptic
3421000	3421750	16.2824	3420458	3421216	yhdZ	E	Amino acid transport and metabolism	predicted amino-acid transporter subunit
724625	726625	16.2757	724211	726259	kdpB	P	Inorganic ion transport and metabolism	potassium-transporting ATPase subunit B
724625	726625	16.2757	726282	727955	kdpA	-	not classify	potassium-transporting ATPase subunit A
2770500	2771500	16.2093	2770189	2770707	ypjL	P	Inorganic ion transport and metabolism	CP4-57 prophage; predicted inner membrane protein
2770500	2771500	16.2093	2770858	2771058	yfjV	P	Inorganic ion transport and metabolism	CP4-57 prophage; predicted protein
2770500	2771500	16.2093	2770998	2771180	ypjM	-	not classify	CP4-57 prophage; predicted protein (pseudogene)
2770500	2771500	16.2093	2771340	2773043	yfjW	-	not classify	CP4-57 prophage; predicted inner membrane protein
2379375	2381125	16.126	2379104	2379565	elaA	R	General function prediction only	predicted acyltransferase with acyl-CoA N-acyltransferase domain
2379375	2381125	16.126	2379630	2380547	elaC	R	General function prediction only	ribonuclease Z
2379375	2381125	16.126	2380735	2381946	elaD	-	not classify	predicted enzyme
919125	919875	16.0279	918458	919573	macA	M	Cell envelope biogenesis, outer membrane	macrolide transporter subunit, membrane fusion protein (MFP) component
919125	919875	16.0279	919570	921516	macB	V	Defense mechanisms	fused macrolide transporter subunits of ABC superfamily: ATP-binding component/membrane component
9125	9625	16.0088	8238	9191	talB	-	not classify	transaldolase B
9125	9625	16.0088	9306	9893	mogA	-	not classify	molybdenum cofactor biosynthesis protein
198000	199500	15.9964	197928	200360	yaeT	M	Cell envelope biogenesis, outer membrane	hypothetical protein
2476000	2478750	15.9777	2475869	2477206	dsdX	E	Amino acid transport and metabolism	predicted transporter
2476000	2478750	15.9777	2477224	2478552	dsdA	E	Amino acid transport and metabolism	D-serine dehydratase
2476000	2478750	15.9777	2478660	2480198	emrY	-	not classify	predicted multidrug efflux system
1274625	1278375	15.9725	1274402	1275052	narL	K	Transcription	DNA-binding response regulator in two-component regulatory system with NarX (or NarQ)
1274625	1278375	15.9725	1275045	1276841	narX	T	Signal transduction mechanism	sensory histidine kinase in two-component regulatory system with NarL
1274625	1278375	15.9725	1277180	1278571	narK	P	Inorganic ion transport and metabolism	nitrate/nitrite transporter
2933500	2935250	15.9533	2932257	2933573	fucP	G	Carbohydrate transport and metabolism	L-fucose transporter
2933500	2935250	15.9533	2933606	2935381	fucI	G	Carbohydrate transport and metabolism	L-fucose isomerase
1864125	1865125	15.9394	1863750	1864496	mipA	-	not classify	scaffolding protein for murein synthesizing machinery
1864125	1865125	15.9394	1864932	1866866	yeaG	T	Signal transduction mechanism	conserved protein with nucleoside triphosphate hydrolase domain
4130000	4131500	15.9036	4127858	4130290	metL	E	Amino acid transport and metabolism	bifunctional aspartate kinase II/homoserine dehydrogenase II
4130000	4131500	15.9036	4130639	4131529	metF	E	Amino acid transport and metabolism	5,10-methylenetetrahydrofolate reductase
782125	783125	15.8801	781308	782351	nadA	-	not classify	quinolinate synthetase
782125	783125	15.8801	782389	783108	pnuC	H	Coenzyme metabolism	predicted nicotinamide mononucleotide transporter
782125	783125	15.8801	783105	784046	ybgR	P	Inorganic ion transport and metabolism	zinc transporter ZitB
2109875	2111875	15.7606	2109101	2110000	rfbD	M	Cell envelope biogenesis, outer membrane	dTDP-4-dehydrorhamnose reductase subunit, NAD(P)-binding, of dTDP-L-rhamnose synthase
2109875	2111875	15.7606	2110000	2111085	rfbB	M	Cell envelope biogenesis, outer membrane	dTDP-glucose 4,6 dehydratase, NAD(P)-binding
2109875	2111875	15.7606	2111458	2112351	galF	M	Cell envelope biogenesis, outer membrane	predicted subunit with GalU
1414125	1415625	15.7213	1412810	1415410	recE	-	not classify	Rac prophage; exonuclease VIII, 5' -> 3' specific dsDNA exonuclease
1414125	1415625	15.7213	1415512	1415787	racC	-	not classify	Rac prophage; predicted protein
664375	667875	15.697	663325	664413	rlpA	M	Cell envelope biogenesis, outer membrane	minor lipoprotein
664375	667875	15.697	664424	665536	mrdB	-	not classify	cell wall shape-determining protein
664375	667875	15.697	665539	667440	mrdA	M	Cell envelope biogenesis, outer membrane	transpeptidase involved in peptidoglycan synthesis (penicillin-binding protein 2)
664375	667875	15.697	667471	667938	ybeA	S	Function unknown	hypothetical protein
3897750	3898500	15.6573	3897431	3898627	yieL	P	Inorganic ion transport and metabolism	predicted xylanase
2002250	2003250	15.6472	2001896	2003302	fliD	N	Cell motility and secretion	flagellar capping protein
1891750	1893000	15.6359	1892829	1894190	pabB	H	Coenzyme metabolism	para-aminobenzoate synthase component I
1065125	1066625	15.6283	1064808	1066049	agp	-	not classify	glucose-1-phosphatase/inositol phosphatase
1065125	1066625	15.6283	1066087	1066314	yccJ	-	not classify	hypothetical protein
1065125	1066625	15.6283	1066335	1066931	wrbA	R	General function prediction only	TrpR binding protein WrbA
2931625	2932375	15.5975	2931063	2931710	fucA	G	Carbohydrate transport and metabolism	L-fuculose phosphate aldolase
2931625	2932375	15.5975	2932257	2933573	fucP	G	Carbohydrate transport and metabolism	L-fucose transporter
3505875	3506875	15.5809	3505734	3506612	php	R	General function prediction only	predicted hydrolase
3505875	3506875	15.5809	3506609	3507835	yhfW	G	Carbohydrate transport and metabolism	predicted mutase
1710750	1712750	15.5618	1712401	1713006	gst	O	Posttranslational modification, protein turnover, chaperones	glutathionine S-transferase
2898125	2898625	15.5421	2897510	2898295	ygcW	R	General function prediction only	predicted deoxygluconate dehydrogenase
2898125	2898625	15.5421	2898614	2899891	yqcE	-	not classify	predicted transporter
4015500	4018000	15.4925	4015356	4016783	rmuC	S	Function unknown	predicted recombination limiting protein
4015500	4018000	15.4925	4016878	4017633	ubiE	H	Coenzyme metabolism	ubiquinone/menaquinone biosynthesis methyltransferase
4015500	4018000	15.4925	4017647	4018252	yigP	-	not classify	hypothetical protein
4241500	4243250	15.4789	4240649	4241539	malG	G	Carbohydrate transport and metabolism	maltose transporter subunit
4241500	4243250	15.4789	4241554	4243098	malF	G	Carbohydrate transport and metabolism	maltose transporter subunit
9000	10000	15.4471	8238	9191	talB	-	not classify	transaldolase B
9000	10000	15.4471	9306	9893	mogA	-	not classify	molybdenum cofactor biosynthesis protein
9000	10000	15.4471	9928	10494	yaaH	S	Function unknown	conserved inner membrane protein associated with acetate transport
2748750	2749500	15.447	2748853	2749731	ppnK	G	Carbohydrate transport and metabolism	inorganic polyphosphate/ATP-NAD kinase
822375	823375	15.4436	821721	822962	ybhO	I	Lipid metabolism	cardiolipin synthase 2
822375	823375	15.4436	822959	823720	ybhP	R	General function prediction only	predicted DNase
948500	949250	15.4239	947883	948791	ycaN	K	Transcription	predicted DNA-binding transcriptional regulator
948500	949250	15.4239	948891	949481	ycaK	R	General function prediction only	hypothetical protein
3460125	3461625	15.4157	3459996	3460373	gspI	U	Intracellular trafficking, secretion,and vesicular transport	general secretory pathway component, cryptic
3460125	3461625	15.4157	3460366	3460953	gspJ	U	Intracellular trafficking, secretion,and vesicular transport	predicted general secretory pathway component, cryptic
3460125	3461625	15.4157	3460946	3461929	gspK	U	Intracellular trafficking, secretion,and vesicular transport	general secretory pathway component, cryptic
1274625	1277125	15.3976	1274402	1275052	narL	K	Transcription	DNA-binding response regulator in two-component regulatory system with NarX (or NarQ)
1274625	1277125	15.3976	1275045	1276841	narX	T	Signal transduction mechanism	sensory histidine kinase in two-component regulatory system with NarL
202500	203500	15.3958	202101	202556	fabZ	I	Lipid metabolism	(3R)-hydroxymyristoyl ACP dehydratase
202500	203500	15.3958	202560	203348	lpxA	M	Cell envelope biogenesis, outer membrane	UDP-N-acetylglucosamine acyltransferase
202500	203500	15.3958	203348	204496	lpxB	M	Cell envelope biogenesis, outer membrane	lipid-A-disaccharide synthase
46750	48250	15.3714	45807	47138	yaaU	-	not classify	predicted transporter
46750	48250	15.3714	47246	47776	yabF	R	General function prediction only	glutathione-regulated potassium-efflux system ancillary protein
46750	48250	15.3714	47769	49631	kefC	P	Inorganic ion transport and metabolism	glutathione-regulated potassium-efflux system protein
1723625	1724625	15.3436	1722760	1723656	ydhF	R	General function prediction only	predicted oxidoreductase
1723625	1724625	15.3436	1723705	1723944	ydhL	R	General function prediction only	hypothetical protein
1723625	1724625	15.3436	1724131	1724646	ydhM	K	Transcription	predicted DNA-binding transcriptional regulator
1443875	1445625	15.3361	1443711	1443896	ynbE	-	not classify	predicted lipoprotein
1443875	1445625	15.3361	1443904	1444230	ydbL	-	not classify	hypothetical protein
1443875	1445625	15.3361	1444402	1445307	feaR	-	not classify	DNA-binding transcriptional dual regulator
1443875	1445625	15.3361	1445543	1447042	feaB	C	Energy production and conversion	phenylacetaldehyde dehydrogenase
948375	950375	15.3338	947883	948791	ycaN	K	Transcription	predicted DNA-binding transcriptional regulator
948375	950375	15.3338	948891	949481	ycaK	R	General function prediction only	hypothetical protein
948375	950375	15.3338	949563	950303	pflA	O	Posttranslational modification, protein turnover, chaperones	pyruvate formate lyase activating enzyme 1
1626500	1627250	15.3162	1626376	1627062	ydfH	K	Transcription	predicted DNA-binding transcriptional regulator
1626500	1627250	15.3162	1627239	1627442	ydfZ	-	not classify	hypothetical protein
2183750	2184500	15.3077	2183546	2183818	yohL	S	Function unknown	hypothetical protein
2183750	2184500	15.3077	2183939	2184763	yohM	R	General function prediction only	membrane protein conferring nickel and cobalt resistance
4314125	4315375	15.276	4314105	4315241	phnM	P	Inorganic ion transport and metabolism	carbon-phosphorus lyase complex subunit
4314125	4315375	15.276	4315238	4315918	phnL	P	Inorganic ion transport and metabolism	carbon-phosphorus lyase complex subunit
1304000	1304500	15.273	1303788	1304792	oppF	E	Amino acid transport and metabolism	oligopeptide transporter subunit
3610875	3611625	15.233	3609888	3610937	yhhT	R	General function prediction only	predicted inner membrane protein
3610875	3611625	15.233	3610992	3611579	acpT	H	Coenzyme metabolism	holo-(acyl carrier protein) synthase 2
2936000	2937000	15.2091	2935460	2936908	fucK	G	Carbohydrate transport and metabolism	L-fuculokinase
2936000	2937000	15.2091	2936910	2937332	fucU	G	Carbohydrate transport and metabolism	L-fucose mutarotase
2425000	2425500	15.1965	2425031	2425813	argT	T	Signal transduction mechanism	lysine/arginine/ornithine transporter subunit
325375	329125	15.1913	324801	326471	betA	E	Amino acid transport and metabolism	choline dehydrogenase
325375	329125	15.1913	326485	327957	betB	C	Energy production and conversion	betaine aldehyde dehydrogenase, NAD-dependent
325375	329125	15.1913	327971	328558	betI	K	Transcription	transcriptional regulator BetI
325375	329125	15.1913	328687	330720	betT	M	Cell envelope biogenesis, outer membrane	choline transporter of high affinity
3987875	3988875	15.1592	3987848	3988789	hemC	-	not classify	porphobilinogen deaminase
365875	367625	15.156	365652	366734	lacI	K	Transcription	lac repressor
365875	367625	15.156	366811	367758	mhpR	K	Transcription	DNA-binding transcriptional activator, 3HPP-binding
2775375	2775875	15.154	2775137	2775454	yfjZ	-	not classify	CP4-57 prophage; antitoxin of the YpjF-YfjZ toxin-antitoxin system
2775375	2775875	15.154	2775475	2775804	ypjF	-	not classify	CP4-57 prophage; toxin of the YpjF-YfjZ toxin-antitoxin system
3460625	3461625	15.1527	3460366	3460953	gspJ	U	Intracellular trafficking, secretion,and vesicular transport	predicted general secretory pathway component, cryptic
3460625	3461625	15.1527	3460946	3461929	gspK	U	Intracellular trafficking, secretion,and vesicular transport	general secretory pathway component, cryptic
350625	353125	15.1058	350439	351890	prpD	-	not classify	2-methylcitrate dehydratase
350625	353125	15.1058	351930	353816	prpE	I	Lipid metabolism	predicted propionyl-CoA synthetase with ATPase domain
3155875	3156875	15.0644	3155672	3156598	yqhG	-	not classify	hypothetical protein
3155875	3156875	15.0644	3156649	3156906	yqhH	-	not classify	predicted outer membrane lipoprotein
3008500	3014250	15.0179	3008050	3009435	ygeZ	F	Nucleotide transport and metabolism	dihydropyrimidinase
3008500	3014250	15.0179	3009483	3010415	yqeA	E	Amino acid transport and metabolism	predicted amino acid kinase
3008500	3014250	15.0179	3010636	3012261	yqeB	R	General function prediction only	conserved protein with NAD(P)-binding Rossman fold
3008500	3014250	15.0179	3012309	3013079	yqeC	-	not classify	hypothetical protein
3008500	3014250	15.0179	3013182	3013760	ygfJ	R	General function prediction only	hypothetical protein
3008500	3014250	15.0179	3014082	3017180	ygfK	R	General function prediction only	predicted oxidoreductase, Fe-S subunit
884000	885000	15.0161	882896	884128	cmr	-	not classify	multidrug efflux system protein
884000	885000	15.0161	884169	884453	ybjH	-	not classify	hypothetical protein
884000	885000	15.0161	884539	885354	ybjI	R	General function prediction only	hypothetical protein
2795375	2795875	14.9466	2795233	2795532	ygaV	K	Transcription	predicted DNA-binding transcriptional regulator
2795375	2795875	14.9466	2795542	2796066	ygaP	P	Inorganic ion transport and metabolism	predicted inner membrane protein with hydrolase activity
1624625	1626125	14.9465	1623359	1625404	dcp	E	Amino acid transport and metabolism	dipeptidyl carboxypeptidase II
1624625	1626125	14.9465	1625541	1626287	ydfG	R	General function prediction only	L-allo-threonine dehydrogenase, NAD(P)-binding
1710875	1712625	14.9367	1710793	1712295	ydgR	E	Amino acid transport and metabolism	putative tripeptide transporter permease
1710875	1712625	14.9367	1712401	1713006	gst	O	Posttranslational modification, protein turnover, chaperones	glutathionine S-transferase
666000	667750	14.9157	665539	667440	mrdA	M	Cell envelope biogenesis, outer membrane	transpeptidase involved in peptidoglycan synthesis (penicillin-binding protein 2)
666000	667750	14.9157	667471	667938	ybeA	S	Function unknown	hypothetical protein
1624500	1626250	14.9084	1623359	1625404	dcp	E	Amino acid transport and metabolism	dipeptidyl carboxypeptidase II
1624500	1626250	14.9084	1625541	1626287	ydfG	R	General function prediction only	L-allo-threonine dehydrogenase, NAD(P)-binding
3689125	3690875	14.8856	3688291	3690630	bcsB	-	not classify	regulator of cellulose synthase, cyclic di-GMP binding
3689125	3690875	14.8856	3690641	3693259	bcsA	M	Cell envelope biogenesis, outer membrane	cellulose synthase, catalytic subunit
2091875	2092875	14.8602	2091492	2092559	hisB	E	Amino acid transport and metabolism	imidazole glycerol-phosphate dehydratase/histidinol phosphatase
2091875	2092875	14.8602	2092559	2093149	hisH	E	Amino acid transport and metabolism	imidazole glycerol phosphate synthase subunit HisH
2023875	2025125	14.8472	2023535	2024350	yedP	R	General function prediction only	hypothetical protein
2023875	2025125	14.8472	2024347	2026041	yedQ	-	not classify	predicted diguanylate cyclase
931625	932125	14.7952	931818	932312	lrp	K	Transcription	DNA-binding transcriptional dual regulator, leucine-binding
2435500	2436500	14.7699	2434737	2435873	pdxB	E	Amino acid transport and metabolism	erythronate-4-phosphate dehydrogenase
2435500	2436500	14.7699	2435972	2436967	flk	-	not classify	predicted flagella assembly protein
564000	564500	14.7458	564038	565201	intD	L	DNA replication, recombination and repair	DLP12 prophage; predicted integrase
3979750	3980500	14.7404	3978910	3980295	yifK	E	Amino acid transport and metabolism	predicted transporter
2140125	2141625	14.7326	2139658	2140239	dcd	F	Nucleotide transport and metabolism	deoxycytidine triphosphate deaminase
2140125	2141625	14.7326	2140331	2140972	udk	F	Nucleotide transport and metabolism	uridine kinase
2140125	2141625	14.7326	2141290	2144607	yegE	T	Signal transduction mechanism	predicted diguanylate cyclase, GGDEF domain signalling protein
248375	248875	14.7094	248358	250070	fhiA	U	Intracellular trafficking, secretion,and vesicular transport	flagellar system protein, promoterless fragment (pseudogene)
4007500	4008500	14.693	4007193	4008215	pldB	I	Lipid metabolism	lysophospholipase L(2)
4007500	4008500	14.693	4008223	4009023	yigL	R	General function prediction only	predicted hydrolase
1886250	1888000	14.6876	1886085	1887770	fadD	Q	Secondary metabolites biosynthesis, transport and catabolism	acyl-CoA synthase
1886250	1888000	14.6876	1887975	1888556	yeaY	-	not classify	predicted lipoprotein
3215625	3218625	14.6563	3215578	3217098	aer	T	Signal transduction mechanism	fused signal transducer for aerotaxis sensory component/methyl accepting chemotaxis component
3215625	3218625	14.6563	3217489	3218895	ygjG	E	Amino acid transport and metabolism	putrescine:2-oxoglutaric acid aminotransferase, PLP-dependent
4205250	4205750	14.6499	4203966	4205555	purH	-	not classify	bifunctional phosphoribosylaminoimidazolecarboxamide formyltransferase/IMP cyclohydrolase
4622000	4623000	14.6265	4621124	4622140	lplA	H	Coenzyme metabolism	lipoate-protein ligase A
4622000	4623000	14.6265	4622168	4622812	ytjB	-	not classify	hypothetical protein
4622000	4623000	14.6265	4622918	4623886	serB	E	Amino acid transport and metabolism	3-phosphoserine phosphatase
2465000	2465500	14.6259	2464567	2465724	intS	L	DNA replication, recombination and repair	CPS-53 (KpLE1) prophage; predicted prophage CPS-53 integrase
2615875	2616625	14.6112	2615600	2615959	yfgD	P	Inorganic ion transport and metabolism	predicted oxidoreductase
2615875	2616625	14.6112	2616097	2616843	hda	L	DNA replication, recombination and repair	DNA replication initiation factor
1223625	1224625	14.6067	1223502	1223768	minE	D	Cell division and chromosome partitioning	cell division topological specificity factor MinE
1223625	1224625	14.6067	1223772	1224584	minD	D	Cell division and chromosome partitioning	membrane ATPase of the MinC-MinD-MinE system
1223625	1224625	14.6067	1224608	1225303	minC	-	not classify	septum formation inhibitor
1555000	1555500	14.603	1554649	1555080	osmC	O	Posttranslational modification, protein turnover, chaperones	osmotically inducible, stress-inducible membrane protein
1555000	1555500	14.603	1555136	1556062	ddpF	P	Inorganic ion transport and metabolism	D-ala-D-ala transporter subunit
478875	479625	14.5958	478591	479142	maa	R	General function prediction only	maltose O-acetyltransferase
478875	479625	14.5958	479314	479532	hha	-	not classify	modulator of gene expression, with H-NS
478875	479625	14.5958	479558	479932	ybaJ	-	not classify	hypothetical protein
15375	15875	14.5657	15445	16557	insL-1	L	DNA replication, recombination and repair	IS186/IS421 transposase
1247500	1249000	14.5449	1246919	1248337	dhaH	S	Function unknown	fused predicted dihydroxyacetone-specific PTS enzymes: HPr component/EI component
1247500	1249000	14.5449	1248348	1248980	dhaL	G	Carbohydrate transport and metabolism	dihydroxyacetone kinase, C-terminal domain
1247500	1249000	14.5449	1248991	1250061	dhaK	G	Carbohydrate transport and metabolism	dihydroxyacetone kinase, N-terminal domain
1024500	1025500	14.5249	1023694	1025748	helD	L	DNA replication, recombination and repair	DNA helicase IV
3149750	3151000	14.5234	3149272	3150006	exbB	U	Intracellular trafficking, secretion,and vesicular transport	membrane spanning protein in TonB-ExbB-ExbD complex
3149750	3151000	14.5234	3150258	3151445	metC	E	Amino acid transport and metabolism	cystathionine beta-lyase
807500	808000	14.4891	807191	808480	bioA	H	Coenzyme metabolism	adenosylmethionine--8-amino-7-oxononanoate transaminase
735250	735750	14.4747	734873	735442	ybfC	-	not classify	hypothetical protein
4392625	4397625	14.4717	4392089	4393636	yjeF	S	Function unknown	predicted carbohydrate kinase
4392625	4397625	14.4717	4393608	4394069	yjeE	R	General function prediction only	ATPase with strong ADP affinity
4392625	4397625	14.4717	4394088	4395425	amiB	M	Cell envelope biogenesis, outer membrane	N-acetylmuramoyl-l-alanine amidase II
4392625	4397625	14.4717	4395435	4397282	mutL	L	DNA replication, recombination and repair	DNA mismatch repair protein
4392625	4397625	14.4717	4397275	4398225	miaA	J	Translation, ribosomal structure and biogenesis	tRNA delta(2)-isopentenylpyrophosphate transferase
269125	273375	14.4477	268513	269406	perR	K	Transcription	CP4-6 prophage; predicted DNA-binding transcriptional regulator
269125	273375	14.4477	269466	269870	insN-1	L	DNA replication, recombination and repair	CP4-6 prophage; partial regulator of insertion element IS911A
269125	273375	14.4477	269827	270978	insI-1	L	DNA replication, recombination and repair	CP4-6 prophage; IS30 transposase
269125	273375	14.4477	271054	271479	insO-1	L	DNA replication, recombination and repair	CP4-6 prophage; partial transposase of insertion element IS911A
269125	273375	14.4477	272071	273216	ykfC	L	DNA replication, recombination and repair	CP4-6 prophage; conserved protein
269125	273375	14.4477	273325	274341	insH-1	L	DNA replication, recombination and repair	CP4-6 prophage; IS5 transposase and trans-activator
4489375	4490625	14.4252	4489229	4490548	idnT	E	Amino acid transport and metabolism	L-idonate and D-gluconate transporter
4489375	4490625	14.4252	4490610	4491374	idnO	R	General function prediction only	gluconate 5-dehydrogenase
3273125	3274125	14.4013	3273304	3274875	garD	-	not classify	(D)-galactarate dehydrogenase
3766375	3767125	14.3801	3766200	3766661	yibG	R	General function prediction only	hypothetical protein
1621500	1622250	14.3359	1620984	1621874	ydeH	-	not classify	hypothetical protein
1621500	1622250	14.3359	1622129	1622521	ydeI	-	not classify	hypothetical protein
1411000	1411500	14.315	1410024	1411259	intR	L	DNA replication, recombination and repair	Rac prophage; integrase
1411000	1411500	14.315	1411261	1411476	ydaQ	-	not classify	Rac prophage; conserved protein
1894500	1895500	14.2845	1894194	1894772	yeaB	-	not classify	predicted NUDIX hydrolase
1894500	1895500	14.2845	1894956	1896320	sdaA	E	Amino acid transport and metabolism	L-serine deaminase I
4521875	4523875	14.2753	4520150	4522117	yjhG	-	not classify	KpLE2 phage-like element; predicted dehydratase
4521875	4523875	14.2753	4522128	4523033	yjhH	M	Cell envelope biogenesis, outer membrane	KpLE2 phage-like element; predicted lyase/synthase
4521875	4523875	14.2753	4523038	4523826	yjhI	K	Transcription	KpLE2 phage-like element; predicted DNA-binding transcriptional regulator
1643375	1644125	14.2661	1643370	1643657	relE	D	Cell division and chromosome partitioning	Qin prophage; toxin of the RelE-RelB toxin-antitoxin system
1643375	1644125	14.2661	1643657	1643896	relB	L	DNA replication, recombination and repair	Qin prophage; bifunctional antitoxin of the RelE-RelB toxin-antitoxin system/ transcriptional repressor
1643375	1644125	14.2661	1643921	1644226	ydfV	-	not classify	Qin prophage; predicted protein
260375	260875	14.2507	259612	260715	proB	E	Amino acid transport and metabolism	gamma-glutamyl kinase
260375	260875	14.2507	260727	261980	proA	E	Amino acid transport and metabolism	gamma-glutamyl phosphate reductase
1221375	1222125	14.2478	1221867	1222142	ymgG	-	not classify	hypothetical protein
3348875	3350875	14.2379	3348711	3351047	arcB	T	Signal transduction mechanism	hybrid sensory histidine kinase in two-component regulatory system with ArcA
3062125	3062875	14.2295	3062015	3062800	ygfG	I	Lipid metabolism	methylmalonyl-CoA decarboxylase, biotin-independent
3062125	3062875	14.2295	3062824	3064302	ygfH	C	Energy production and conversion	propionyl-CoA:succinate-CoA transferase
656625	657875	14.1845	656515	656724	cspE	-	not classify	cold shock protein E
656625	657875	14.1845	656778	657161	ccrB	D	Cell division and chromosome partitioning	camphor resistance protein CrcB
3420250	3420750	14.1376	3419347	3420450	yhdY	E	Amino acid transport and metabolism	predicted amino-acid transporter subunit
3420250	3420750	14.1376	3420458	3421216	yhdZ	E	Amino acid transport and metabolism	predicted amino-acid transporter subunit
661250	662000	14.102	660860	661501	lipB	H	Coenzyme metabolism	lipoyltransferase
661250	662000	14.102	661602	661865	ybeD	-	not classify	hypothetical protein
661250	662000	14.102	661975	663186	dacA	M	Cell envelope biogenesis, outer membrane	D-alanyl-D-alanine carboxypeptidase (penicillin-binding protein 5)
3948375	3950375	14.0915	3948345	3948443	ilvL	-	not classify	ilvG operon leader peptide
3948375	3950375	14.0915	3950224	3950487	ilvM	S	Function unknown	acetolactate synthase II, small subunit
2448875	2449375	14.089	2448609	2449097	yfcQ	-	not classify	predicted fimbrial-like adhesin protein
2448875	2449375	14.089	2449094	2449606	yfcR	-	not classify	predicted fimbrial-like adhesin protein
483000	484750	14.0523	480478	483627	acrB	V	Defense mechanisms	multidrug efflux system protein
483000	484750	14.0523	483650	484843	acrA	M	Cell envelope biogenesis, outer membrane	multidrug efflux system
389625	394875	14.0393	394354	395511	ampH	V	Defense mechanisms	beta-lactamase/D-alanine carboxypeptidase
3426250	3427500	14.0019	3427258	3427812	yrdA	R	General function prediction only	hypothetical protein
1485375	1486125	13.9112	1485259	1486059	ydcF	S	Function unknown	hypothetical protein
3420125	3421875	13.9032	3419347	3420450	yhdY	E	Amino acid transport and metabolism	predicted amino-acid transporter subunit
3420125	3421875	13.9032	3420458	3421216	yhdZ	E	Amino acid transport and metabolism	predicted amino-acid transporter subunit
1243500	1244250	13.8898	1243016	1243750	ycgR	M	Cell envelope biogenesis, outer membrane	protein involved in flagellar function
1243500	1244250	13.8898	1243951	1244205	ymgE	S	Function unknown	predicted inner membrane protein
4281000	4282750	13.8874	4279806	4281098	yjcF	S	Function unknown	hypothetical protein
4281000	4282750	13.8874	4281276	4282925	actP	R	General function prediction only	acetate permease
4047000	4048000	13.8852	4044989	4047775	polA	L	DNA replication, recombination and repair	DNA polymerase I
3651750	3652750	13.882	3652706	3653236	yhiF	K	Transcription	predicted DNA-binding ranscriptional regulator
3830500	3831000	13.8816	3830242	3832560	yicI	G	Carbohydrate transport and metabolism	predicted alpha-glucosidase
149000	150250	13.8345	148807	149601	panB	H	Coenzyme metabolism	3-methyl-2-oxobutanoate hydroxymethyltransferase
149000	150250	13.8345	149715	150953	yadC	-	not classify	predicted fimbrial-like adhesin protein
179000	180000	13.7819	178455	179153	pfs	F	Nucleotide transport and metabolism	5'-methylthioadenosine/S-adenosylhomocysteine nucleosidase
179000	180000	13.7819	179237	180754	dgt	F	Nucleotide transport and metabolism	deoxyguanosinetriphosphate triphosphohydrolase
3602000	3602750	13.7486	3600773	3602266	ftsY	U	Intracellular trafficking, secretion,and vesicular transport	fused Signal Recognition Particle (SRP) receptor: membrane binding protein/conserved protein
3602000	3602750	13.7486	3602416	3603012	yhhF	L	DNA replication, recombination and repair	predicted methyltransferase
4252000	4254250	13.7275	4252066	4254489	plsB	I	Lipid metabolism	glycerol-3-phosphate acyltransferase
2023750	2027750	13.7198	2023535	2024350	yedP	R	General function prediction only	hypothetical protein
2023750	2027750	13.7198	2024347	2026041	yedQ	-	not classify	predicted diguanylate cyclase
2023750	2027750	13.7198	2026212	2026394	yodC	S	Function unknown	hypothetical protein
2023750	2027750	13.7198	2026473	2027390	yedI	S	Function unknown	conserved inner membrane protein
2023750	2027750	13.7198	2027563	2028483	yedA	-	not classify	predicted inner membrane protein
2334000	2338000	13.7155	2332978	2334666	yfaA	S	Function unknown	hypothetical protein
2334000	2338000	13.7155	2334815	2337442	gyrA	L	DNA replication, recombination and repair	DNA gyrase subunit A
2334000	2338000	13.7155	2337589	2338311	ubiG	H	Coenzyme metabolism	3-demethylubiquinone-9 3-methyltransferase
3080000	3080750	13.6911	3079935	3080693	yggG	O	Posttranslational modification, protein turnover, chaperones	predicted peptidase
3562625	3567625	13.6861	3562157	3564604	glgP	G	Carbohydrate transport and metabolism	glycogen phosphorylase
3562625	3567625	13.6861	3564623	3566056	glgA	G	Carbohydrate transport and metabolism	glycogen synthase
3562625	3567625	13.6861	3566056	3567351	glgC	G	Carbohydrate transport and metabolism	glucose-1-phosphate adenylyltransferase
3562625	3567625	13.6861	3567369	3569342	glgX	G	Carbohydrate transport and metabolism	glycogen debranching enzyme
1896125	1899875	13.6626	1894956	1896320	sdaA	E	Amino acid transport and metabolism	L-serine deaminase I
1896125	1899875	13.6626	1896451	1898049	yoaD	-	not classify	predicted phosphodiesterase
1896125	1899875	13.6626	1898053	1899609	yoaE	R	General function prediction only	fused predicted membrane protein/conserved protein
1857500	1858750	13.6527	1856874	1858253	ydjK	-	not classify	predicted transporter
1857500	1858750	13.6527	1858280	1859356	ydjL	R	General function prediction only	predicted oxidoreductase, Zn-dependent and NAD(P)-binding
85875	87375	13.6297	85630	87354	ilvI	H	Coenzyme metabolism	acetolactate synthase III large subunit
85875	87375	13.6297	87357	87848	ilvH	E	Amino acid transport and metabolism	acetolactate synthase small subunit
260000	261750	13.6176	259612	260715	proB	E	Amino acid transport and metabolism	gamma-glutamyl kinase
260000	261750	13.6176	260727	261980	proA	E	Amino acid transport and metabolism	gamma-glutamyl phosphate reductase
3418375	3422125	13.6067	3418156	3419337	yhdX	E	Amino acid transport and metabolism	predicted amino-acid transporter subunit
3418375	3422125	13.6067	3419347	3420450	yhdY	E	Amino acid transport and metabolism	predicted amino-acid transporter subunit
3418375	3422125	13.6067	3420458	3421216	yhdZ	E	Amino acid transport and metabolism	predicted amino-acid transporter subunit
3441125	3442125	13.5961	3440788	3442119	prlA	U	Intracellular trafficking, secretion,and vesicular transport	protein translocase subunit SecY
2209375	2211625	13.5922	2209247	2209708	yehR	-	not classify	hypothetical protein
2209375	2211625	13.5922	2209748	2210218	yehS	-	not classify	hypothetical protein
2209375	2211625	13.5922	2210265	2210984	yehT	T	Signal transduction mechanism	predicted response regulator in two-component system withYehU
2209375	2211625	13.5922	2210981	2212666	yehU	T	Signal transduction mechanism	predicted sensory kinase in two-component system with YehT
4257375	4260125	13.584	4257260	4257469	yjbJ	S	Function unknown	predicted stress response protein
4257375	4260125	13.584	4257511	4258026	zur	P	Inorganic ion transport and metabolism	DNA-binding transcriptional repressor, Zn(II)-binding
4257375	4260125	13.584	4258344	4258598	yjbL	-	not classify	hypothetical protein
4257375	4260125	13.584	4258622	4259329	yjbM	-	not classify	hypothetical protein
4257375	4260125	13.584	4259692	4260729	yjbN	J	Translation, ribosomal structure and biogenesis	tRNA-dihydrouridine synthase A
4392750	4393750	13.5697	4392089	4393636	yjeF	S	Function unknown	predicted carbohydrate kinase
4392750	4393750	13.5697	4393608	4394069	yjeE	R	General function prediction only	ATPase with strong ADP affinity
1032625	1034375	13.5662	1032477	1034270	hyaB	C	Energy production and conversion	hydrogenase 1, large subunit
1032625	1034375	13.5662	1034289	1034996	hyaC	C	Energy production and conversion	hydrogenase 1, b-type cytochrome subunit
842500	843000	13.5269	842478	844703	ybiO	M	Cell envelope biogenesis, outer membrane	predicted mechanosensitive channel
189250	190000	13.4896	188712	189506	map	J	Translation, ribosomal structure and biogenesis	methionine aminopeptidase
189250	190000	13.4896	189874	190599	rpsB	-	not classify	30S ribosomal protein S2
474125	475125	13.4304	473525	474385	tesB	I	Lipid metabolism	acyl-CoA thioesterase II
474125	475125	13.4304	474603	475175	ybaY	S	Function unknown	predicted outer membrane lipoprotein
1986250	1987250	13.4041	1986246	1986569	yecR	-	not classify	hypothetical protein
1986250	1987250	13.4041	1986740	1987237	ftn	P	Inorganic ion transport and metabolism	ferritin iron storage protein (cytoplasmic)
2225000	2226250	13.401	2224531	2225292	yohF	R	General function prediction only	predicted oxidoreductase with NAD(P)-binding Rossmann-fold domain
2225000	2226250	13.401	2225345	2226433	yohG	U	Intracellular trafficking, secretion,and vesicular transport	predicted outer membrane protein
4416750	4417250	13.3907	4416584	4417648	ulaG	R	General function prediction only	predicted L-ascorbate 6-phosphate lactonase
2002125	2003625	13.3759	2001896	2003302	fliD	N	Cell motility and secretion	flagellar capping protein
2002125	2003625	13.3759	2003327	2003737	fliS	O	Posttranslational modification, protein turnover, chaperones	flagellar protein FliS
478875	479875	13.3402	478591	479142	maa	R	General function prediction only	maltose O-acetyltransferase
478875	479875	13.3402	479314	479532	hha	-	not classify	modulator of gene expression, with H-NS
478875	479875	13.3402	479558	479932	ybaJ	-	not classify	hypothetical protein
3693750	3696000	13.339	3693256	3693984	yhjQ	D	Cell division and chromosome partitioning	cell division protein (chromosome partitioning ATPase) (pseudogene)
3693750	3696000	13.339	3694020	3694208	yhjR	-	not classify	hypothetical protein
3693750	3696000	13.339	3694481	3696052	bcsE	-	not classify	hypothetical protein
1609500	1610250	13.3248	1608931	1609878	yneF	-	not classify	predicted diguanylate cyclase
1609500	1610250	13.3248	1609990	1610349	yneG	-	not classify	hypothetical protein
3306250	3306750	13.2963	3306062	3306946	nlpI	R	General function prediction only	hypothetical protein
1062500	1064250	13.2824	1062078	1062998	cbpA	O	Posttranslational modification, protein turnover, chaperones	curved DNA-binding protein, DnaJ homologue that functions as a co-chaperone of DnaK
1062500	1064250	13.2824	1063259	1064515	yccE	-	not classify	hypothetical protein
3120250	3122750	13.2769	3119656	3121827	glcB	C	Energy production and conversion	malate synthase
3120250	3122750	13.2769	3121849	3122253	glcG	R	General function prediction only	hypothetical protein
3120250	3122750	13.2769	3122258	3123481	glcF	C	Energy production and conversion	glycolate oxidase iron-sulfur subunit
1695875	1697875	13.2515	1695297	1696064	hdhA	R	General function prediction only	7-alpha-hydroxysteroid dehydrogenase
1695875	1697875	13.2515	1696176	1697204	malI	K	Transcription	DNA-binding transcriptional repressor
1695875	1697875	13.2515	1697379	1698971	malX	G	Carbohydrate transport and metabolism	fused maltose and glucose-specific PTS enzymes: IIB component -! IIC component
462375	464125	13.2495	461139	463010	ppiD	O	Posttranslational modification, protein turnover, chaperones	peptidyl-prolyl cis-trans isomerase (rotamase D)
462375	464125	13.2495	463161	463532	ybaV	L	DNA replication, recombination and repair	hypothetical protein
462375	464125	13.2495	463626	464024	ybaW	R	General function prediction only	hypothetical protein
462375	464125	13.2495	464076	464771	ybaX	R	General function prediction only	predicted aluminum resistance protein
1161875	1163125	13.2444	1161861	1162502	ycfM	R	General function prediction only	predicted outer membrane lipoprotein
1161875	1163125	13.2444	1162483	1163307	ycfN	M	Cell envelope biogenesis, outer membrane	thiamin kinase
114500	116000	13.2271	115714	117099	hofB	U	Intracellular trafficking, secretion,and vesicular transport	conserved protein with nucleoside triphosphate hydrolase domain
4507000	4508250	13.1927	4506981	4507577	insO-2	L	DNA replication, recombination and repair	KpLE2 phage-like element; partial transposase of insertion element IS911B
4507000	4508250	13.1927	4507743	4508156	yjhV	R	General function prediction only	KpLE2 phage-like element; predicted protein
3376875	3378375	13.1816	3378213	3378611	yhcB	-	not classify	hypothetical protein
573625	574125	13.117	573960	574976	insH-2	L	DNA replication, recombination and repair	DLP12 prophage; IS5 transposase and trans-activator
3581250	3582250	13.1157	3581064	3581477	yrhA	-	not classify	hypothetical protein
3581250	3582250	13.1157	3581506	3581781	insA-6	L	DNA replication, recombination and repair	IS1 repressor protein InsA
3581250	3582250	13.1157	3581700	3582203	insB-6	L	DNA replication, recombination and repair	IS1 transposase InsAB'
3383875	3384375	13.0988	3384243	3386210	aaeB	S	Function unknown	p-hydroxybenzoic acid efflux system component
738375	738875	13.0983	738224	738733	ybgA	S	Function unknown	hypothetical protein
738375	738875	13.0983	738730	740148	phr	L	DNA replication, recombination and repair	deoxyribodipyrimidine photolyase, FAD-binding
2525500	2526250	13.0757	2524968	2525966	yfeH	R	General function prediction only	predicted inner membrane protein
2525500	2526250	13.0757	2525963	2526181	ypeB	S	Function unknown	hypothetical protein
2525500	2526250	13.0757	2526183	2528198	ligA	L	DNA replication, recombination and repair	NAD-dependent DNA ligase LigA
1735750	1738250	13.0731	1737935	1739146	ydhC	-	not classify	predicted transporter
1733750	1734750	13.0659	1733402	1733983	sodB	P	Inorganic ion transport and metabolism	superoxide dismutase, Fe
1733750	1734750	13.0659	1734145	1735314	ydhP	G	Carbohydrate transport and metabolism	predicted transporter
2297875	2301125	13.0597	2297587	2298282	napG	C	Energy production and conversion	quinol dehydrogenase periplasmic component
2297875	2301125	13.0597	2298289	2300775	napA	C	Energy production and conversion	nitrate reductase, periplasmic, large subunit
2297875	2301125	13.0597	2300772	2301035	napD	-	not classify	assembly protein for periplasmic nitrate reductase
2297875	2301125	13.0597	2301025	2301519	napF	C	Energy production and conversion	ferredoxin-type protein, predicted role in electron transfer to periplasmic nitrate reductase (NapA)
1026500	1028000	13.0518	1026334	1026996	yccT	-	not classify	hypothetical protein
1026500	1028000	13.0518	1027169	1027582	yccU	R	General function prediction only	predicted CoA-binding protein with NAD(P)-binding Rossmann-fold domain
1026500	1028000	13.0518	1027627	1027995	yccV	S	Function unknown	DNA-binding protein, hemimethylated
7875	8375	13.0467	6529	7959	yaaJ	E	Amino acid transport and metabolism	predicted transporter
7875	8375	13.0467	8238	9191	talB	-	not classify	transaldolase B
260000	262250	13.0045	259612	260715	proB	E	Amino acid transport and metabolism	gamma-glutamyl kinase
260000	262250	13.0045	260727	261980	proA	E	Amino acid transport and metabolism	gamma-glutamyl phosphate reductase
707750	708750	13.001	707557	708963	ybfM	-	not classify	predicted outer membrane porin
1267125	1268625	12.9725	1266543	1267352	ychA	S	Function unknown	predicted transcriptional regulator
1267125	1268625	12.9725	1267388	1268242	kdsA	M	Cell envelope biogenesis, outer membrane	2-dehydro-3-deoxyphosphooctonate aldolase
1267125	1268625	12.9725	1268391	1268498	ldrA	-	not classify	toxic polypeptide, small
1223625	1224375	12.9497	1223502	1223768	minE	D	Cell division and chromosome partitioning	cell division topological specificity factor MinE
1223625	1224375	12.9497	1223772	1224584	minD	D	Cell division and chromosome partitioning	membrane ATPase of the MinC-MinD-MinE system
998500	1000250	12.9415	998439	1001039	ycbS	U	Intracellular trafficking, secretion,and vesicular transport	predicted outer membrane usher protein
264000	264750	12.9266	263972	264430	yafX	-	not classify	CP4-6 prophage; predicted protein
264000	264750	12.9266	264528	264767	ykfF	-	not classify	CP4-6 prophage; predicted protein
4541375	4546625	12.9171	4541138	4541686	fimA	U	Intracellular trafficking, secretion,and vesicular transport	major type 1 subunit fimbrin (pilin)
4541375	4546625	12.9171	4541751	4542290	fimI	U	Intracellular trafficking, secretion,and vesicular transport	fimbrial protein involved in type 1 pilus biosynthesis
4541375	4546625	12.9171	4542327	4543052	fimC	U	Intracellular trafficking, secretion,and vesicular transport	chaperone, periplasmic
4541375	4546625	12.9171	4543119	4545755	fimD	U	Intracellular trafficking, secretion,and vesicular transport	outer membrane usher protein, type 1 fimbrial synthesis
4541375	4546625	12.9171	4545765	4546295	fimF	U	Intracellular trafficking, secretion,and vesicular transport	minor component of type 1 fimbriae
4541375	4546625	12.9171	4546308	4546811	fimG	U	Intracellular trafficking, secretion,and vesicular transport	minor component of type 1 fimbriae
998375	1002625	12.8955	997713	998414	ycbR	U	Intracellular trafficking, secretion,and vesicular transport	predicted periplasmic pilin chaperone
998375	1002625	12.8955	998439	1001039	ycbS	U	Intracellular trafficking, secretion,and vesicular transport	predicted outer membrane usher protein
998375	1002625	12.8955	1001030	1002100	ycbT	-	not classify	predicted fimbrial-like adhesin protein
998375	1002625	12.8955	1002112	1002654	ycbU	U	Intracellular trafficking, secretion,and vesicular transport	predicted fimbrial-like adhesin protein
1362375	1364875	12.8707	1362256	1363536	puuB	E	Amino acid transport and metabolism	gamma-Glu-putrescine oxidase, FAD/NAD(P)-binding
1362375	1364875	12.8707	1363574	1364839	puuE	E	Amino acid transport and metabolism	GABA aminotransferase, PLP-dependent
1027000	1027750	12.8705	1027627	1027995	yccV	S	Function unknown	DNA-binding protein, hemimethylated
877500	878000	12.8658	877471	877854	yliH	-	not classify	hypothetical protein
877500	878000	12.8658	877965	879080	yliI	G	Carbohydrate transport and metabolism	predicted dehydrogenase
3836375	3837125	12.831	3836271	3837194	yicL	-	not classify	predicted inner membrane protein
1539125	1540375	12.8292	1536874	1540614	narZ	C	Energy production and conversion	nitrate reductase 2 (NRZ), alpha subunit
3029500	3030750	12.8073	3029389	3030837	ygfU	F	Nucleotide transport and metabolism	predicted transporter
2177125	2179125	12.7922	2176843	2178120	yegT	-	not classify	predicted nucleoside transporter
2177125	2179125	12.7922	2178117	2179121	yegU	-	not classify	predicted hydrolase
2177125	2179125	12.7922	2179118	2180083	yegV	G	Carbohydrate transport and metabolism	predicted kinase
201000	201750	12.762	200971	201996	lpxD	M	Cell envelope biogenesis, outer membrane	UDP-3-O-[3-hydroxymyristoyl] glucosamine N-acyltransferase
3749250	3751000	12.7505	3749151	3749891	yiaT	-	not classify	hypothetical protein
3749250	3751000	12.7505	3750015	3750989	yiaU	K	Transcription	predicted DNA-binding transcriptional regulator
3749250	3751000	12.7505	3750986	3752122	yiaV	V	Defense mechanisms	membrane fusion protein (MFP) component of efflux pump, signal anchor
1267250	1268500	12.746	1266543	1267352	ychA	S	Function unknown	predicted transcriptional regulator
1267250	1268500	12.746	1267388	1268242	kdsA	M	Cell envelope biogenesis, outer membrane	2-dehydro-3-deoxyphosphooctonate aldolase
1267250	1268500	12.746	1268391	1268498	ldrA	-	not classify	toxic polypeptide, small
3377000	3378250	12.7451	3376892	3378019	yhcM	R	General function prediction only	conserved protein with nucleoside triphosphate hydrolase domain
3377000	3378250	12.7451	3378213	3378611	yhcB	-	not classify	hypothetical protein
106000	106500	12.7434	105305	106456	ftsZ	D	Cell division and chromosome partitioning	cell division protein FtsZ
1576125	1577625	12.7365	1575681	1577366	yddA	R	General function prediction only	fused predicted multidrug transporter subunits of ABC superfamily: membrane component/ATP-binding component
3328875	3330875	12.735	3328604	3329776	obgE	R	General function prediction only	GTPase involved in cell partioning and DNA repair
3328875	3330875	12.735	3329792	3330757	yhbE	-	not classify	conserved inner membrane protein
4496000	4497500	12.735	4496618	4497523	insD-6	L	DNA replication, recombination and repair	KpLE2 phage-like element; IS2 insertion element transposase InsAB'
537500	539750	12.7124	536857	538311	ybbW	H	Coenzyme metabolism	predicted allantoin transporter
537500	539750	12.7124	538371	539732	allB	F	Nucleotide transport and metabolism	allantoinase
4484000	4484750	12.7099	4484241	4485341	yjgP	-	not classify	conserved inner membrane protein
4126375	4127625	12.6451	4126101	4126418	metJ	-	not classify	transcriptional repressor protein MetJ
4126375	4127625	12.6451	4126695	4127855	metB	E	Amino acid transport and metabolism	cystathionine gamma-synthase
4587000	4587750	12.5556	4586899	4587102	yjiX	-	not classify	hypothetical protein
4587000	4587750	12.5556	4587152	4589302	yjiY	T	Signal transduction mechanism	predicted inner membrane protein
3127625	3129375	12.5532	3127065	3128237	yghO	-	not classify	predicted DNA-binding transcriptional regulator
3127625	3129375	12.5532	3128200	3129216	insH-9	L	DNA replication, recombination and repair	IS5 transposase and trans-activator
3127625	3129375	12.5532	3129363	3130430	yghQ	R	General function prediction only	predicted inner membrane protein
1651000	1651750	12.5407	1650920	1651939	rspB	R	General function prediction only	predicted oxidoreductase, Zn-dependent and NAD(P)-binding
2470875	2471625	12.5392	2470409	2470903	yfdN	-	not classify	CPS-53 (KpLE1) prophage; predicted protein
2470875	2471625	12.5392	2470900	2471268	yfdO	-	not classify	CPS-53 (KpLE1) prophage; predicted defective phage replication protein O
2470875	2471625	12.5392	2471542	2471988	yfdP	-	not classify	CPS-53 (KpLE1) prophage; predicted protein
899750	901000	12.5369	899067	899798	artJ	T	Signal transduction mechanism	arginine transporter subunit
899750	901000	12.5369	900089	900757	artM	E	Amino acid transport and metabolism	arginine transporter subunit
899750	901000	12.5369	900757	901473	artQ	E	Amino acid transport and metabolism	arginine transporter subunit
4526875	4528125	12.5352	4526134	4526940	sgcQ	R	General function prediction only	KpLE2 phage-like element; predicted nucleoside triphosphatase
4526875	4528125	12.5352	4526953	4528266	sgcC	G	Carbohydrate transport and metabolism	KpLE2 phage-like element; predicted phosphotransferase enzyme IIC component
3299375	3299875	12.5322	3299507	3300502	yhbU	-	not classify	predicted peptidase (collagenase-like)
2686250	2686750	12.5299	2685491	2686825	yfhA	T	Signal transduction mechanism	predicted DNA-binding response regulator in two-component system
2981750	2982500	12.5285	2981310	2982146	kduI	G	Carbohydrate transport and metabolism	5-keto-4-deoxyuronate isomerase
2981750	2982500	12.5285	2982433	2983614	yqeF	I	Lipid metabolism	acetyl-CoA acetyltransferase
3332250	3333000	12.5195	3331732	3332703	ispB	H	Coenzyme metabolism	octaprenyl diphosphate synthase
3332250	3333000	12.5195	3332931	3333209	sfsB	K	Transcription	DNA-binding transcriptional activator of maltose metabolism
2480750	2481750	12.4899	2480198	2481361	emrK	V	Defense mechanisms	EmrKY-TolC multidrug resistance efflux pump, membrane fusion protein component
2431625	2432375	12.4619	2431034	2431948	accD	I	Lipid metabolism	acetyl-CoA carboxylase subunit beta
2431625	2432375	12.4619	2432104	2432763	dedA	S	Function unknown	conserved inner membrane protein
9000	9750	12.4584	8238	9191	talB	-	not classify	transaldolase B
9000	9750	12.4584	9306	9893	mogA	-	not classify	molybdenum cofactor biosynthesis protein
2181000	2182750	12.4492	2180855	2181673	yegX	M	Cell envelope biogenesis, outer membrane	predicted hydrolase
2181000	2182750	12.4492	2181738	2182538	thiD	H	Coenzyme metabolism	phosphomethylpyrimidine kinase
2181000	2182750	12.4492	2182535	2183323	thiM	H	Coenzyme metabolism	hydroxyethylthiazole kinase
1334000	1335500	12.4477	1333855	1336530	acnA	C	Energy production and conversion	aconitate hydratase
4518750	4520250	12.4374	4518694	4520043	yjhF	E	Amino acid transport and metabolism	KpLE2 phage-like element; predicted transporter
4518750	4520250	12.4374	4520150	4522117	yjhG	-	not classify	KpLE2 phage-like element; predicted dehydratase
3840500	3842250	12.4206	3840478	3841812	yicO	R	General function prediction only	predicted xanthine/uracil permase
3840500	3842250	12.4206	3841987	3843753	ade	F	Nucleotide transport and metabolism	cryptic adenine deaminase
3397875	3399625	12.4055	3396897	3398000	mreC	M	Cell envelope biogenesis, outer membrane	cell wall structural complex MreBCD transmembrane component MreC
3397875	3399625	12.4055	3398066	3399109	mreB	D	Cell division and chromosome partitioning	cell wall structural complex MreBCD, actin-like component MreB
3397875	3399625	12.4055	3399414	3401354	yhdA	-	not classify	conserved inner membrane protein
456750	458000	12.3938	456650	457924	clpX	O	Posttranslational modification, protein turnover, chaperones	ATP-dependent protease ATP-binding subunit
456875	457875	12.3938	456650	457924	clpX	O	Posttranslational modification, protein turnover, chaperones	ATP-dependent protease ATP-binding subunit
4190375	4190875	12.3809	4189888	4190658	thiG	H	Coenzyme metabolism	thiazole synthase
4190375	4190875	12.3809	4190660	4190860	thiS	H	Coenzyme metabolism	sulfur carrier protein ThiS
4190375	4190875	12.3809	4190844	4191599	thiF	H	Coenzyme metabolism	thiamine biosynthesis protein ThiF
3418375	3430125	12.3564	3418156	3419337	yhdX	E	Amino acid transport and metabolism	predicted amino-acid transporter subunit
3418375	3430125	12.3564	3419347	3420450	yhdY	E	Amino acid transport and metabolism	predicted amino-acid transporter subunit
3418375	3430125	12.3564	3420458	3421216	yhdZ	E	Amino acid transport and metabolism	predicted amino-acid transporter subunit
3418375	3430125	12.3564	3427258	3427812	yrdA	R	General function prediction only	hypothetical protein
3418375	3430125	12.3564	3427788	3428045	yrdB	-	not classify	hypothetical protein
3418375	3430125	12.3564	3428042	3428860	aroE	E	Amino acid transport and metabolism	dehydroshikimate reductase, NAD(P)-binding
3418375	3430125	12.3564	3428865	3429437	yrdC	J	Translation, ribosomal structure and biogenesis	predicted ribosome maturation factor
3418375	3430125	12.3564	3429442	3429984	yrdD	L	DNA replication, recombination and repair	predicted DNA topoisomerase
3418375	3430125	12.3564	3430013	3430486	smg	-	not classify	hypothetical protein
4489000	4491250	12.3535	4488164	4489162	idnR	K	Transcription	DNA-binding transcriptional repressor, 5-gluconate-binding
4489000	4491250	12.3535	4489229	4490548	idnT	E	Amino acid transport and metabolism	L-idonate and D-gluconate transporter
4489000	4491250	12.3535	4490610	4491374	idnO	R	General function prediction only	gluconate 5-dehydrogenase
892375	892875	12.3474	892180	892656	ybjN	-	not classify	predicted oxidoreductase
1580750	1581250	12.3179	1580950	1581711	ydeO	-	not classify	predicted DNA-binding transcriptional acfivator
255375	257125	12.2999	254259	255716	pepD	E	Amino acid transport and metabolism	aminoacyl-histidine dipeptidase (peptidase D)
255375	257125	12.2999	255977	256435	gpt	F	Nucleotide transport and metabolism	xanthine phosphoribosyltransferase
255375	257125	12.2999	256527	257771	yafA	-	not classify	fermentation/respiration switch protein
3825500	3826500	12.2868	3825483	3826688	gltS	E	Amino acid transport and metabolism	glutamate transporter
239875	240625	12.2831	239419	240189	yafV	R	General function prediction only	predicted C-N hydrolase family amidase, NAD(P)-binding
239875	240625	12.2831	240343	240816	ivy	-	not classify	inhibitor of vertebrate C-lysozyme
1935375	1937125	12.2754	1934676	1935545	yebK	K	Transcription	predicted DNA-binding transcriptional regulator
1935375	1937125	12.2754	1935673	1937115	pykA	-	not classify	pyruvate kinase
3769250	3771500	12.2714	3768266	3769402	yibH	V	Defense mechanisms	hypothetical protein
3769250	3771500	12.2714	3769405	3769767	yibI	-	not classify	predicted inner membrane protein
3769250	3771500	12.2714	3770304	3772217	mtlA	G	Carbohydrate transport and metabolism	fused mannitol-specific PTS enzymes: IIA components/IIB components/IIC components
443750	445250	12.2671	444526	445890	yajR	-	not classify	predicted transporter
3103500	3104250	12.261	3102455	3103534	mltC	M	Cell envelope biogenesis, outer membrane	membrane-bound lytic murein transglycosylase C
3103500	3104250	12.261	3103736	3104992	nupG	-	not classify	nucleoside transporter
185500	186750	12.2327	185123	185947	dapD	E	Amino acid transport and metabolism	2,3,4,5-tetrahydropyridine-2-carboxylate N-succinyltransferase
185500	186750	12.2327	185978	188650	glnD	O	Posttranslational modification, protein turnover, chaperones	PII uridylyl-transferase
235750	237000	12.2313	235535	236002	rnhA	L	DNA replication, recombination and repair	ribonuclease H
235750	237000	12.2313	236067	236798	dnaQ	L	DNA replication, recombination and repair	DNA polymerase III subunit epsilon
3335375	3336375	12.2293	3335278	3335913	yrbC	Q	Secondary metabolites biosynthesis, transport and catabolism	predicted ABC-type organic solvent transporter
3335375	3336375	12.2293	3335932	3336483	yrbD	Q	Secondary metabolites biosynthesis, transport and catabolism	predicted ABC-type organic solvent transporter
184250	188000	12.2228	185978	188650	glnD	O	Posttranslational modification, protein turnover, chaperones	PII uridylyl-transferase
3098000	3102500	12.2153	3097704	3098750	ansB	-	not classify	periplasmic L-asparaginase II
3098000	3102500	12.2153	3098926	3099645	yggN	-	not classify	hypothetical protein
3098000	3102500	12.2153	3099829	3100155	yggL	-	not classify	hypothetical protein
3098000	3102500	12.2153	3100155	3100874	yggH	R	General function prediction only	tRNA(m7G46)-methyltransferase
3098000	3102500	12.2153	3101035	3102087	mutY	L	DNA replication, recombination and repair	adenine DNA glycosylase
3098000	3102500	12.2153	3102115	3102390	yggX	-	not classify	hypothetical protein
3098000	3102500	12.2153	3102455	3103534	mltC	M	Cell envelope biogenesis, outer membrane	membrane-bound lytic murein transglycosylase C
2203875	2205625	12.1937	2203717	2205996	yehM	-	not classify	hypothetical protein
1397250	1398250	12.1919	1396798	1397550	fnr	T	Signal transduction mechanism	DNA-binding transcriptional dual regulator, global regulator of anaerobic growth
1397250	1398250	12.1919	1397745	1398260	ogt	L	DNA replication, recombination and repair	O-6-alkylguanine-DNA:cysteine-protein methyltransferase
863250	864750	12.1794	862865	863527	fsaA	-	not classify	fructose-6-phosphate aldolase 1
863250	864750	12.1794	863603	864352	moeB	H	Coenzyme metabolism	molybdopterin biosynthesis protein MoeB
863250	864750	12.1794	864352	865587	moeA	H	Coenzyme metabolism	molybdopterin biosynthesis protein
2682875	2684125	12.1718	2682276	2683529	glyA	E	Amino acid transport and metabolism	serine hydroxymethyltransferase
2682875	2684125	12.1718	2683857	2685047	hmp	C	Energy production and conversion	fused nitric oxide dioxygenase/dihydropteridine reductase 2
3749375	3750875	12.1635	3749151	3749891	yiaT	-	not classify	hypothetical protein
3749375	3750875	12.1635	3750015	3750989	yiaU	K	Transcription	predicted DNA-binding transcriptional regulator
970000	971750	12.1624	969896	970078	ycaR	-	not classify	hypothetical protein
970000	971750	12.1624	970075	970821	kdsB	M	Cell envelope biogenesis, outer membrane	3-deoxy-manno-octulosonate cytidylyltransferase
970000	971750	12.1624	970975	971868	ycbJ	-	not classify	hypothetical protein
4094000	4095500	12.1538	4092746	4094005	rhaA	-	not classify	L-rhamnose isomerase
4094000	4095500	12.1538	4094002	4095471	rhaB	G	Carbohydrate transport and metabolism	rhamnulokinase
4348125	4353125	12.1277	4348054	4349685	dcuS	T	Signal transduction mechanism	sensory histidine kinase in two-component regulatory system with DcuR, regulator of anaerobic fumarate respiration
4348125	4353125	12.1277	4349866	4350096	yjdI	S	Function unknown	hypothetical protein
4348125	4353125	12.1277	4350108	4350380	yjdJ	R	General function prediction only	predicted acyltransferase with acyl-CoA N-acyltransferase domain
4348125	4353125	12.1277	4350607	4350903	yjdK	-	not classify	hypothetical protein
4348125	4353125	12.1277	4350931	4351104	yjdO	-	not classify	hypothetical protein
4348125	4353125	12.1277	4351223	4352740	lysU	J	Translation, ribosomal structure and biogenesis	lysine tRNA synthetase, inducible
4348125	4353125	12.1277	4352977	4354434	yjdL	E	Amino acid transport and metabolism	predicted transporter
4049000	4051000	12.1217	4050068	4051441	hemN	H	Coenzyme metabolism	coproporphyrinogen III oxidase
1244750	1245500	12.0873	1244383	1244823	ycgY	-	not classify	hypothetical protein
1244750	1245500	12.0873	1244902	1246599	treA	G	Carbohydrate transport and metabolism	periplasmic trehalase
1066875	1067375	12.0699	1066335	1066931	wrbA	R	General function prediction only	TrpR binding protein WrbA
1066875	1067375	12.0699	1067304	1067477	ymdF	-	not classify	hypothetical protein
1714000	1714500	12.0573	1713972	1715246	tyrS	J	Translation, ribosomal structure and biogenesis	tyrosyl-tRNA synthetase
2178000	2178500	12.0075	2176843	2178120	yegT	-	not classify	predicted nucleoside transporter
2178000	2178500	12.0075	2178117	2179121	yegU	-	not classify	predicted hydrolase
1199125	1201625	11.9832	1198902	1200029	intE	-	not classify	e14 prophage; predicted integrase
1199125	1201625	11.9832	1200010	1200255	ymfG	-	not classify	e14 prophage; predicted excisionase
1199125	1201625	11.9832	1200292	1200603	ymfH	-	not classify	e14 prophage; predicted protein
1199125	1201625	11.9832	1200720	1201061	ymfI	-	not classify	e14 prophage; predicted protein
1199125	1201625	11.9832	1200999	1201307	ymfJ	-	not classify	e14 prophage; predicted protein
1199125	1201625	11.9832	1201482	1202156	ymfK	T	Signal transduction mechanism	e14 prophage; repressor protein phage e14
2097875	2102125	11.9664	2101415	2102533	wbbK	M	Cell envelope biogenesis, outer membrane	lipopolysaccharide biosynthesis protein
577000	577500	11.9078	576836	577333	ybcS	R	General function prediction only	DLP12 prophage; predicted lysozyme
577000	577500	11.9078	577330	577791	rzpD	-	not classify	DLP12 prophage; predicted murein endopeptidase
1735875	1738125	11.9051	1735868	1736893	purR	K	Transcription	DNA-binding transcriptional repressor, hypoxanthine-binding
1735875	1738125	11.9051	1736890	1737822	ydhB	K	Transcription	predicted DNA-binding transcriptional regulator
1735875	1738125	11.9051	1737935	1739146	ydhC	-	not classify	predicted transporter
1814250	1817250	11.8935	1816629	1817471	chbR	-	not classify	DNA-binding transcriptional dual regulator
911000	911750	11.8749	910405	911373	hcr	C	Energy production and conversion	HCP oxidoreductase, NADH-dependent
911000	911750	11.8749	911385	913037	hcp	-	not classify	hydroxylamine reductase
1744625	1745375	11.8596	1745155	1746759	ydhS	S	Function unknown	conserved protein with FAD/NAD(P)-binding domain
4129875	4131625	11.853	4127858	4130290	metL	E	Amino acid transport and metabolism	bifunctional aspartate kinase II/homoserine dehydrogenase II
4129875	4131625	11.853	4130639	4131529	metF	E	Amino acid transport and metabolism	5,10-methylenetetrahydrofolate reductase
2362125	2362625	11.8466	2361755	2362297	yfaZ	-	not classify	predicted outer membrane porin protein
2362125	2362625	11.8466	2362576	2363001	yfaO	-	not classify	predicted NUDIX hydrolase
3505875	3507875	11.8325	3505734	3506612	php	R	General function prediction only	predicted hydrolase
3505875	3507875	11.8325	3506609	3507835	yhfW	G	Carbohydrate transport and metabolism	predicted mutase
3505875	3507875	11.8325	3507835	3508998	yhfX	E	Amino acid transport and metabolism	predicted amino acid racemase
1957500	1959750	11.8283	1957304	1957870	yecM	-	not classify	predicted metal-binding enzyme
1957500	1959750	11.8283	1958086	1959819	argS	J	Translation, ribosomal structure and biogenesis	arginyl-tRNA synthetase
4343875	4347375	11.8226	4343703	4345349	fumB	C	Energy production and conversion	anaerobic class I fumarate hydratase (fumarase B)
4343875	4347375	11.8226	4345427	4346767	dcuB	R	General function prediction only	C4-dicarboxylate antiporter
4343875	4347375	11.8226	4347338	4348057	dcuR	T	Signal transduction mechanism	DNA-binding response regulator in two-component regulatory system with DcuS
3491250	3495000	11.7492	3490590	3491771	yhfC	-	not classify	hypothetical protein
3491250	3495000	11.7492	3492033	3494576	nirB	C	Energy production and conversion	nitrite reductase, large subunit, NAD(P)H-binding
3491250	3495000	11.7492	3494573	3494899	nirD	R	General function prediction only	nitrite reductase small subunit
2490625	2492625	11.7416	2490026	2491276	yfdW	C	Energy production and conversion	formyl-coenzyme A transferase
2490625	2492625	11.7416	2491789	2492424	yfdX	-	not classify	hypothetical protein
1390375	1390875	11.7055	1390015	1390914	ycjZ	K	Transcription	predicted DNA-binding transcriptional regulator
1327625	1328125	11.6992	1327356	1328405	sohB	U	Intracellular trafficking, secretion,and vesicular transport	predicted inner membrane peptidase
533750	535750	11.6969	533140	534921	gcl	R	General function prediction only	glyoxylate carboligase
533750	535750	11.6969	534934	535710	hyi	G	Carbohydrate transport and metabolism	hydroxypyruvate isomerase
118250	119500	11.6929	117752	118645	nadC	H	Coenzyme metabolism	nicotinate-nucleotide pyrophosphorylase
118250	119500	11.6929	118733	119284	ampD	V	Defense mechanisms	N-acetyl-anhydromuranmyl-L-alanine amidase
118250	119500	11.6929	119281	120135	ampE	V	Defense mechanisms	predicted inner membrane protein
2801250	2802250	11.6907	2799370	2801514	nrdE	F	Nucleotide transport and metabolism	ribonucleotide-diphosphate reductase alpha subunit
2801250	2802250	11.6907	2801524	2802483	nrdF	F	Nucleotide transport and metabolism	ribonucleotide-diphosphate reductase beta subunit
2701250	2702000	11.6829	2700503	2701408	era	R	General function prediction only	GTP-binding protein Era
2701250	2702000	11.6829	2701405	2702085	rncS	K	Transcription	ribonuclease III
2994875	2995375	11.6645	2994394	2995299	insD-4	L	DNA replication, recombination and repair	IS2 insertion element transposase InsAB'
2994875	2995375	11.6645	2995257	2995667	insC-4	L	DNA replication, recombination and repair	IS2 insertion element repressor InsA
1499750	1500250	11.6569	1499586	1500179	tehB	R	General function prediction only	predicted S-adenosyl-L-methionine-dependent methyltransferase
1098750	1099750	11.6563	1098102	1098839	ycdX	R	General function prediction only	hypothetical protein
1098750	1099750	11.6563	1098863	1099417	ycdY	R	General function prediction only	hypothetical protein
1098750	1099750	11.6563	1099519	1100010	ycdZ	-	not classify	predicted inner membrane protein
3159750	3162250	11.6443	3159279	3160691	sufI	Q	Secondary metabolites biosynthesis, transport and catabolism	repressor protein for FtsI
3159750	3162250	11.6443	3160766	3161503	plsC	I	Lipid metabolism	1-acyl-sn-glycerol-3-phosphate acyltransferase
3159750	3162250	11.6443	3161737	3163995	parC	L	DNA replication, recombination and repair	DNA topoisomerase IV subunit A
1965500	1968000	11.6427	1965476	1966525	cheB	T	Signal transduction mechanism	chemotaxis-specific methylesterase
1965500	1968000	11.6427	1966528	1967388	cheR	T	Signal transduction mechanism	chemotaxis regulator, protein-glutamate methyltransferase
1965500	1968000	11.6427	1967407	1969008	tap	T	Signal transduction mechanism	methyl-accepting protein IV
3195250	3197250	11.6393	3194823	3197663	glnE	T	Signal transduction mechanism	fused deadenylyltransferase/adenylyltransferase for glutamine synthetase
3033625	3034875	11.6183	3033206	3034304	prfB	J	Translation, ribosomal structure and biogenesis	peptide chain release factor 2
3033625	3034875	11.6183	3034395	3036128	recJ	L	DNA replication, recombination and repair	ssDNA exonuclease, 5' --> 3'-specific
2252875	2253375	11.6003	2252267	2253208	rihB	F	Nucleotide transport and metabolism	ribonucleoside hydrolase 2
956000	956750	11.5975	955985	956677	ycaP	-	not classify	conserved inner membrane protein
4598500	4599250	11.5965	4598261	4598998	dnaC	L	DNA replication, recombination and repair	DNA biosynthesis protein
4598500	4599250	11.5965	4599001	4599540	dnaT	-	not classify	primosomal protein I
2326125	2326625	11.587	2325389	2326165	yfaP	S	Function unknown	hypothetical protein
2326125	2326625	11.587	2326170	2327819	yfaQ	S	Function unknown	hypothetical protein
1727250	1727750	11.5715	1727111	1731727	lhr	R	General function prediction only	predicted ATP-dependent helicase
1257625	1258125	11.5659	1257152	1257736	pth	-	not classify	peptidyl-tRNA hydrolase
1257625	1258125	11.5659	1258014	1258292	ychH	-	not classify	predicted inner membrane protein
474000	475750	11.5603	473525	474385	tesB	I	Lipid metabolism	acyl-CoA thioesterase II
474000	475750	11.5603	474603	475175	ybaY	S	Function unknown	predicted outer membrane lipoprotein
474000	475750	11.5603	475206	475595	ybaZ	L	DNA replication, recombination and repair	predicted methyltransferase
1757750	1760250	11.5546	1757327	1758547	sufS	E	Amino acid transport and metabolism	selenocysteine lyase
1757750	1760250	11.5546	1758544	1759815	sufD	-	not classify	component of SufBCD complex
1757750	1760250	11.5546	1759790	1760536	sufC	O	Posttranslational modification, protein turnover, chaperones	cysteine desulfurase ATPase component
3654875	3659625	11.5394	3658437	3661550	mdtF	V	Defense mechanisms	multidrug transporter, RpoS-dependent
4550125	4551125	11.5364	4549659	4550843	uxuA	G	Carbohydrate transport and metabolism	mannonate dehydratase
4550125	4551125	11.5364	4550924	4552384	uxuB	-	not classify	D-mannonate oxidoreductase, NAD-binding
4233500	4235250	11.5342	4234920	4235657	yjbG	-	not classify	hypothetical protein
783625	784625	11.5297	783105	784046	ybgR	P	Inorganic ion transport and metabolism	zinc transporter ZitB
783625	784625	11.5297	784160	784540	ybgS	-	not classify	hypothetical protein
1388500	1389500	11.5284	1387894	1388682	mpaA	E	Amino acid transport and metabolism	murein peptide amidase A
1388500	1389500	11.5284	1388957	1389889	ycjY	R	General function prediction only	predicted hydrolase
1199375	1201625	11.5173	1198902	1200029	intE	-	not classify	e14 prophage; predicted integrase
1199375	1201625	11.5173	1200010	1200255	ymfG	-	not classify	e14 prophage; predicted excisionase
1199375	1201625	11.5173	1200292	1200603	ymfH	-	not classify	e14 prophage; predicted protein
1199375	1201625	11.5173	1200720	1201061	ymfI	-	not classify	e14 prophage; predicted protein
1199375	1201625	11.5173	1200999	1201307	ymfJ	-	not classify	e14 prophage; predicted protein
1199375	1201625	11.5173	1201482	1202156	ymfK	T	Signal transduction mechanism	e14 prophage; repressor protein phage e14
1103375	1104625	11.4971	1103174	1103629	csgB	-	not classify	curlin nucleator protein, minor subunit in curli complex
1103375	1104625	11.4971	1103670	1104125	csgA	-	not classify	cryptic curlin major subunit
1103375	1104625	11.4971	1104184	1104516	csgC	-	not classify	predicted curli production protein
2088250	2089250	11.4928	2088216	2089115	hisG	E	Amino acid transport and metabolism	ATP phosphoribosyltransferase
2088250	2089250	11.4928	2089121	2090425	hisD	-	not classify	histidinol dehydrogenase
1454750	1455250	11.4867	1454454	1455524	paaE	C	Energy production and conversion	predicted multicomponent oxygenase/reductase subunit for phenylacetic acid degradation
3311875	3313875	11.4858	3311364	3314036	infB	J	Translation, ribosomal structure and biogenesis	translation initiation factor IF-2
1628625	1629125	11.4798	1627477	1628937	ydfI	-	not classify	predicted mannonate dehydrogenase
1628625	1629125	11.4798	1629026	1630309	ydfJ	-	not classify	predicted transporter
1717375	1718125	11.45	1716517	1717626	ydhH	O	Posttranslational modification, protein turnover, chaperones	anhydro-N-acetylmuramic acid kinase
1717375	1718125	11.45	1717900	1718367	slyB	M	Cell envelope biogenesis, outer membrane	outer membrane lipoprotein
2929625	2930875	11.4349	2928987	2929832	xni	L	DNA replication, recombination and repair	exonuclease IX
2929625	2930875	11.4349	2929887	2931038	fucO	C	Energy production and conversion	L-1,2-propanediol oxidoreductase
1049125	1050375	11.4347	1049056	1049331	insA-4	L	DNA replication, recombination and repair	IS1 repressor protein InsA
1049125	1050375	11.4347	1049250	1049753	insB-4	L	DNA replication, recombination and repair	IS1 transposase InsAB'
1049125	1050375	11.4347	1050186	1050398	cspH	-	not classify	stress protein, member of the CspA-family
2480750	2482000	11.4258	2480198	2481361	emrK	V	Defense mechanisms	EmrKY-TolC multidrug resistance efflux pump, membrane fusion protein component
2480750	2482000	11.4258	2481777	2482391	evgA	K	Transcription	DNA-binding response regulator in two-component regulatory system with EvgS
2464750	2465750	11.4048	2464567	2465724	intS	L	DNA replication, recombination and repair	CPS-53 (KpLE1) prophage; predicted prophage CPS-53 integrase
2129500	2132000	11.4001	2128877	2130094	wcaC	M	Cell envelope biogenesis, outer membrane	predicted glycosyl transferase
2129500	2132000	11.4001	2130091	2130579	wcaB	E	Amino acid transport and metabolism	predicted acyl transferase
2129500	2132000	11.4001	2130582	2131421	wcaA	M	Cell envelope biogenesis, outer membrane	predicted glycosyl transferase
2129500	2132000	11.4001	2131514	2133676	wzc	M	Cell envelope biogenesis, outer membrane	protein-tyrosine kinase
3003750	3004500	11.3957	3002030	3003808	ygeV	T	Signal transduction mechanism	predicted DNA-binding transcriptional regulator
3003750	3004500	11.3957	3004284	3005474	ygeW	E	Amino acid transport and metabolism	hypothetical protein
4059625	4060125	11.3818	4059188	4060168	yihM	G	Carbohydrate transport and metabolism	predicted sugar phosphate isomerase
257500	258500	11.3812	256527	257771	yafA	-	not classify	fermentation/respiration switch protein
257500	258500	11.3812	257829	258230	crl	-	not classify	DNA-binding transcriptional regulator
257500	258500	11.3812	258269	259324	phoE	M	Cell envelope biogenesis, outer membrane	outer membrane phosphoporin protein E
4214875	4216375	11.3702	4213501	4215102	aceB	C	Energy production and conversion	malate synthase
4214875	4216375	11.3702	4215132	4216436	aceA	C	Energy production and conversion	isocitrate lyase
4174375	4175125	11.3409	4173967	4175151	tufB	J	Translation, ribosomal structure and biogenesis	protein chain elongation factor EF-Tu (duplicate of tufA)
2181000	2182250	11.3401	2180855	2181673	yegX	M	Cell envelope biogenesis, outer membrane	predicted hydrolase
2181000	2182250	11.3401	2181738	2182538	thiD	H	Coenzyme metabolism	phosphomethylpyrimidine kinase
[truncated: 37,026 more rows]

## Sheet: 654_0
Clone Start	Clone Stop	Fitness	ln(Fitness)	Gene Start	Gene Stop	Gene	COG	COG Name	Function
[truncated: 39,804 more rows]
